# Supplementary material for: Are luminescent Ru2+ chelated complexes selective coordinative sensors for the detection of heavy cations?
Source: Royal Society of Chemistry journal article supplement (doi:10.1039/d1cp04442g), 2021-12-17
Supplement: d1cp04442g3.pdf [file d1cp04442g3.pdf]

Electronic Supplementary Informations

Are luminescent Ru<sup>2+</sup> chelated complexes selective coordinative sensors for the  
detection of heavy cations ?

C. Gourlaouen, B. Schweitzer and C. Daniel

|                                                                                                                |    |
|----------------------------------------------------------------------------------------------------------------|----|
| Scheme S1: Definition of E <sub>abs</sub> , E <sub>em</sub> , E <sub>def</sub> and E <sub>stab</sub> energies. |    |
| Figure S1 : spectra of <b>1</b> , in black without SOC, in red with SOC                                        | 3  |
| Figure S2: spectra of <b>1-Ca</b>                                                                              | 3  |
| Figure S3: spectra of <b>1-Mn</b>                                                                              | 4  |
| Figure S4: spectra of <b>1-Fe</b>                                                                              | 4  |
| Figure S5 : spectra of <b>1-Co</b>                                                                             | 5  |
| Figure S6: spectra of <b>1-Ni</b>                                                                              | 5  |
| Figure S7: spectra of <b>1-Zn</b>                                                                              | 6  |
| Figure S8: spectra of <b>1-Rh</b>                                                                              | 6  |
| Figure S9: spectra of <b>1-Pd</b> , in black without SOC and in red with SOC                                   | 7  |
| Figure S10: spectra of <b>1-Cd</b>                                                                             | 7  |
| Figure S11: spectra of <b>1-Pt</b> , in black without SOC and in red with SOC                                  | 8  |
| Figure S12: spectra of <b>1-Au(I)</b>                                                                          | 8  |
| Figure S13: spectra of <b>1-Au(III)</b>                                                                        | 9  |
| Figure S14: spectra of <b>1-Hg</b>                                                                             | 9  |
| Figure S15: spectra of <b>1-Pb</b>                                                                             | 10 |
| Figure S16: Character of the low-lying triplet states (T <sub>1</sub> -T <sub>15</sub> ) of <b>1</b>           | 10 |
| Figure S17: Character of the low-lying triplet states (T <sub>1</sub> -T <sub>30</sub> ) of <b>1-Pd</b>        | 10 |
| Figure S18: : Character of the low-lying singlet states of <b>1-Fe</b>                                         | 10 |
| Figure S19: Character of the low-lying singlet states of <b>1-Rh</b> .                                         | 11 |
| Figure S20 : Character of the low-lying singlet states of <b>1-Au(I)</b>                                       | 11 |
| Figure S21 : Character of the low-lying singlet states of <b>1-Au(III)</b>                                     | 11 |
| Figure S22 : Character of the low-lying singlet states of <b>1-Hg</b>                                          | 11 |
| <i>Table S1: Energy (in Ev), oscillator strength and nature of the singlet states of <b>1</b></i>              | 12 |
| <i>Table S2: Energy (in Ev), oscillator strength and nature of the singlet states of <b>1-Ca</b></i>           | 12 |
| <i>Table S3: Energy (in Ev), oscillator strength and nature of the singlet states of <b>1-Mn</b></i>           | 13 |
| <i>Table S4: Energy (in Ev), oscillator strength and nature of the singlet states of <b>1-Fe</b></i>           | 15 |
| <i>Table S5: Energy (in Ev), oscillator strength and nature of the singlet states of <b>1-Co</b></i>           | 16 |
| <i>Table S6: Energy (in Ev), oscillator strength and nature of the singlet states of <b>1-Ni</b></i>           | 18 |
| <i>Table S7: Energy (in Ev), oscillator strength and nature of the singlet states of <b>1-Zn</b></i>           | 19 |
| <i>Table S8: Energy (in Ev), oscillator strength and nature of the singlet states of <b>1-Rh</b></i>           | 20 |
| <i>Table S9: Energy (in Ev), oscillator strength and nature of the singlet states of <b>1-Pd</b></i>           | 21 |
| <i>Table S10: Energy (in Ev), oscillator strength and nature of the singlet states of <b>1-Cd</b></i>          | 22 |
| <i>Table S11: Energy (in Ev), oscillator strength and nature of the singlet states of <b>1-Pt</b></i>          | 23 |
| <i>Table S12: Energy (in Ev), oscillator strength and nature of the singlet states of <b>1-Au(I)</b></i>       | 24 |
| <i>Table S13: Energy (in Ev), oscillator strength and nature of the singlet states of <b>1-Au(III)</b></i>     | 25 |
| <i>Table S14: Energy (in Ev), oscillator strength and nature of the singlet states of <b>1-Hg</b></i>          | 26 |
| <i>Table S15: Energy (in Ev), oscillator strength and nature of the singlet states of <b>1-Pb</b></i>          | 27 |

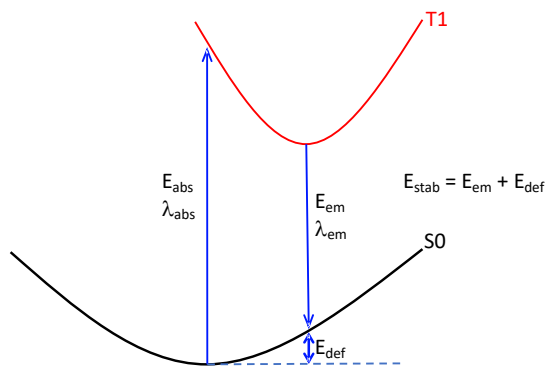

Scheme S1: Definition of  $E_{abs}$ ,  $E_{em}$ ,  $E_{def}$  and  $E_{stab}$  energies.

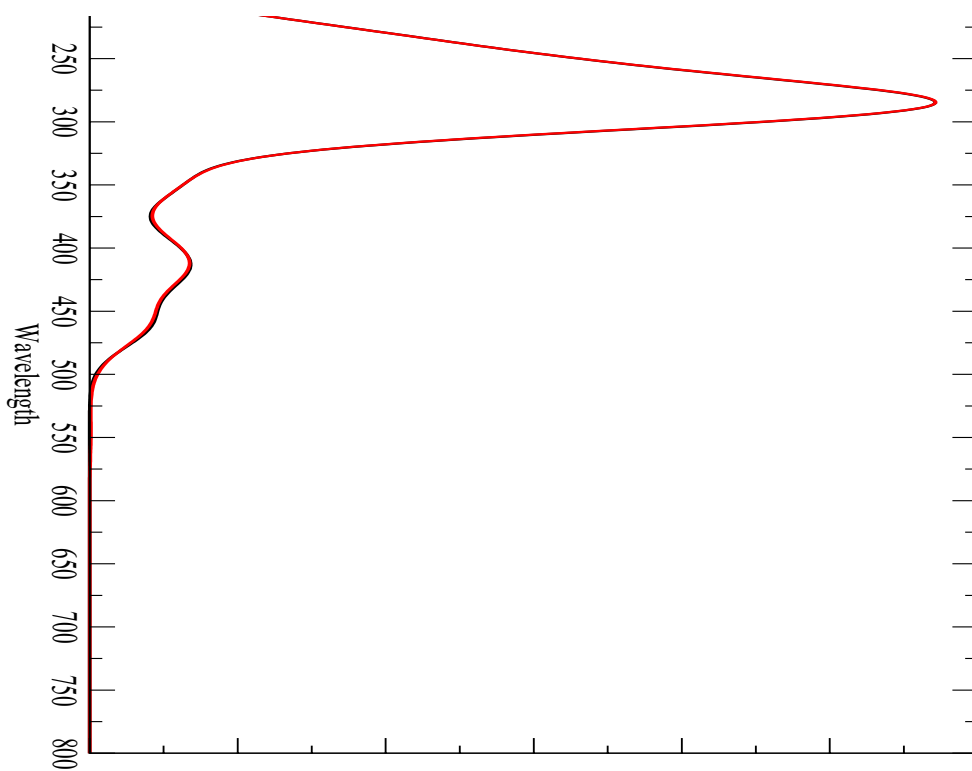

Figure S1 : spectra of **1**, in black without SOC, in red with SOC

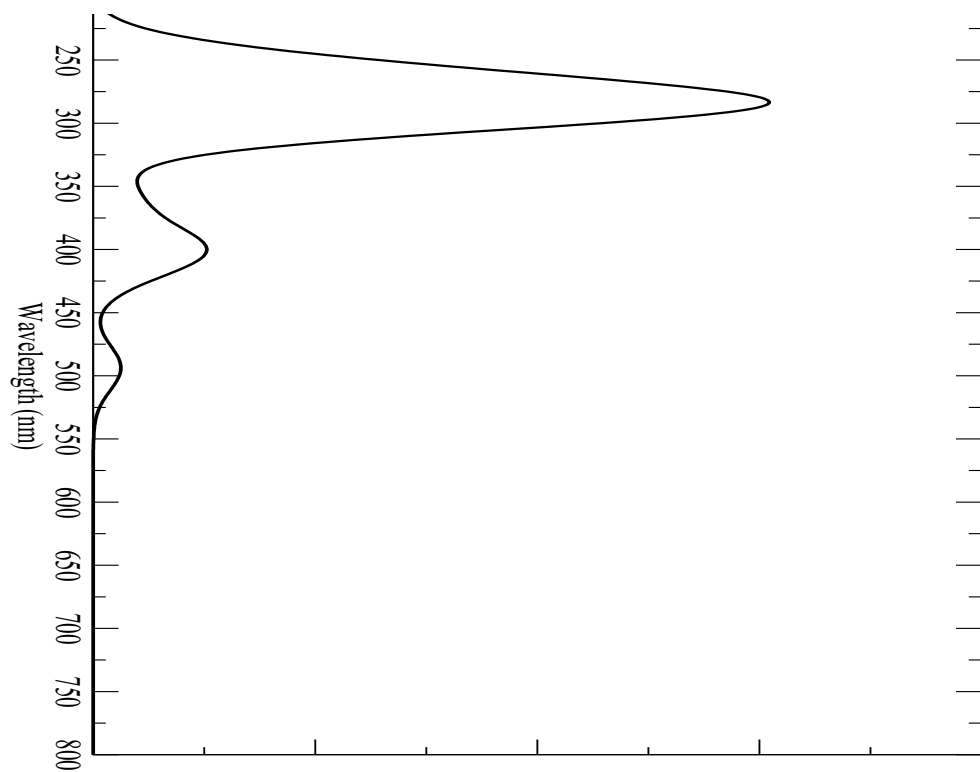

Figure S2: spectra of **1-Ca**

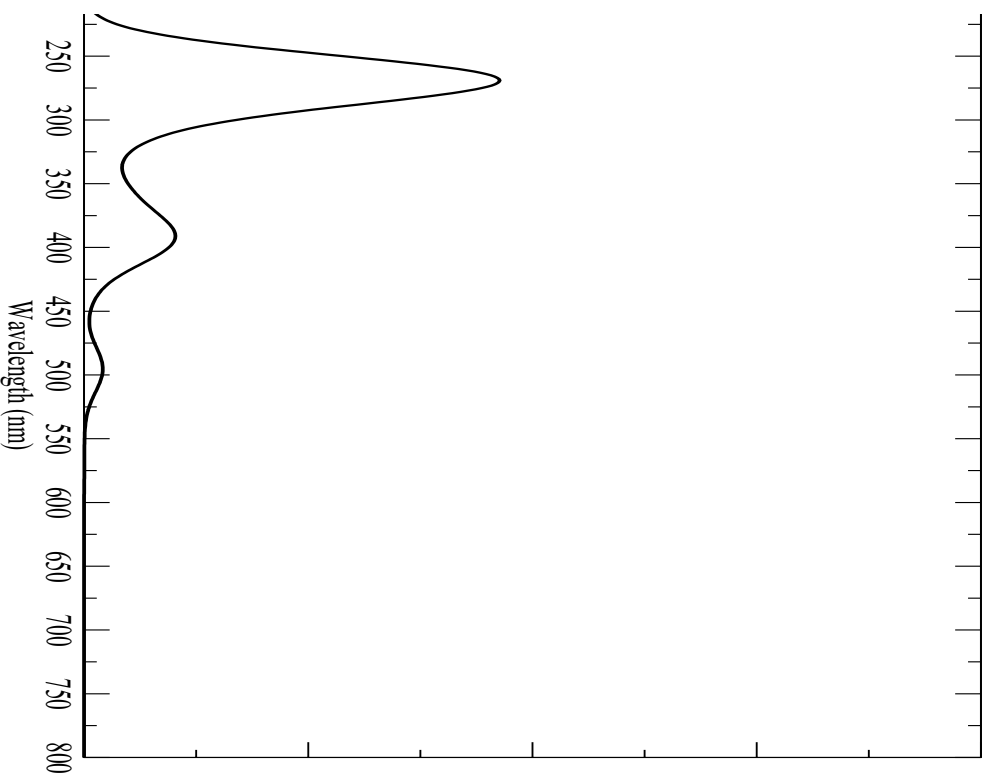

Figure S3: spectra of **1-Mn**

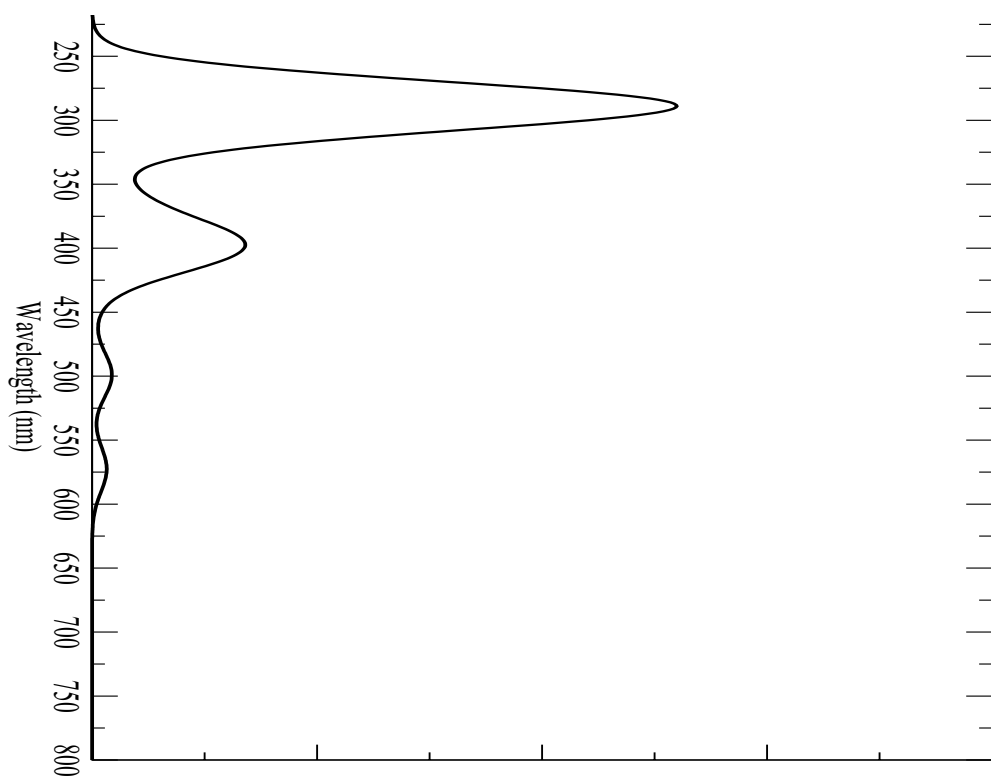

Figure S4: spectra of **1-Fe**

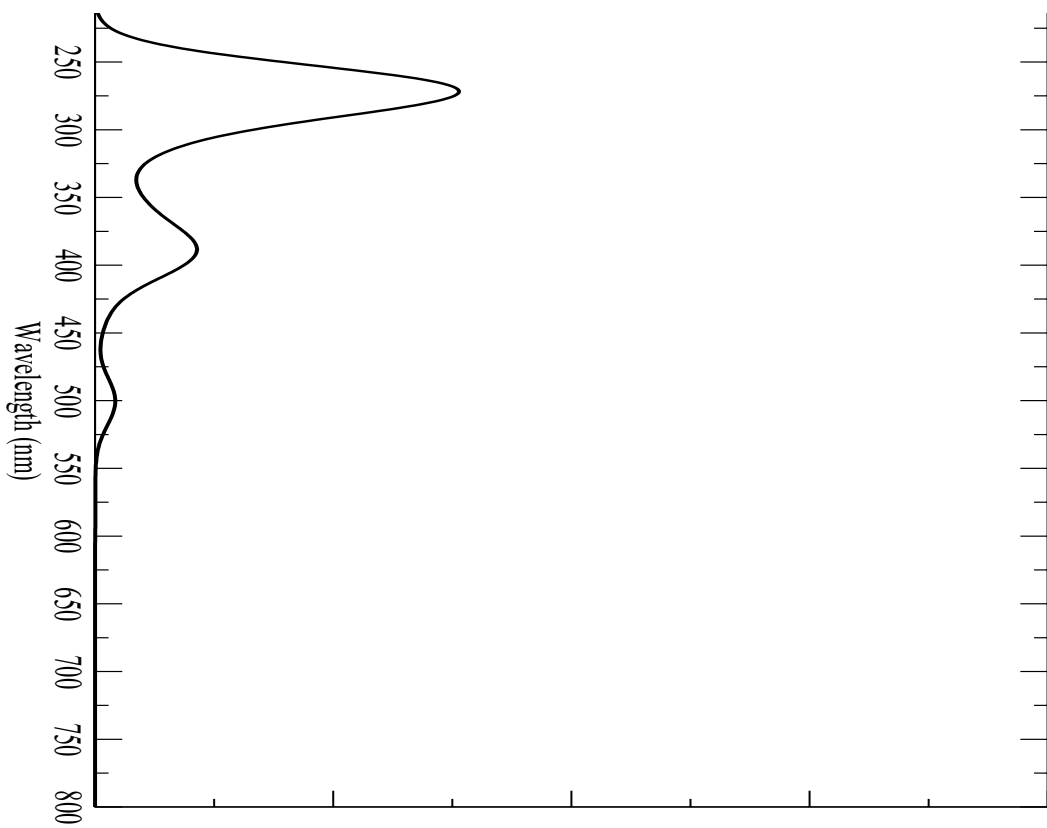

Figure S5 : spectra of 1-Co

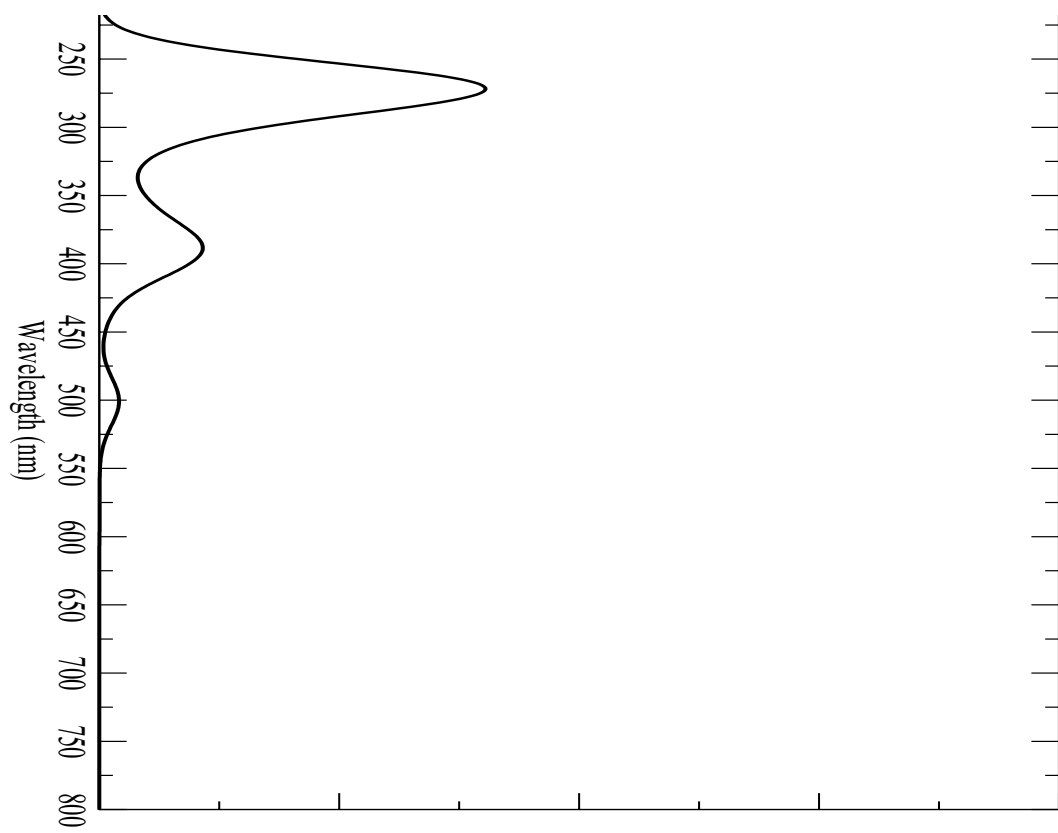

Figure S6: spectra of **1-Ni**



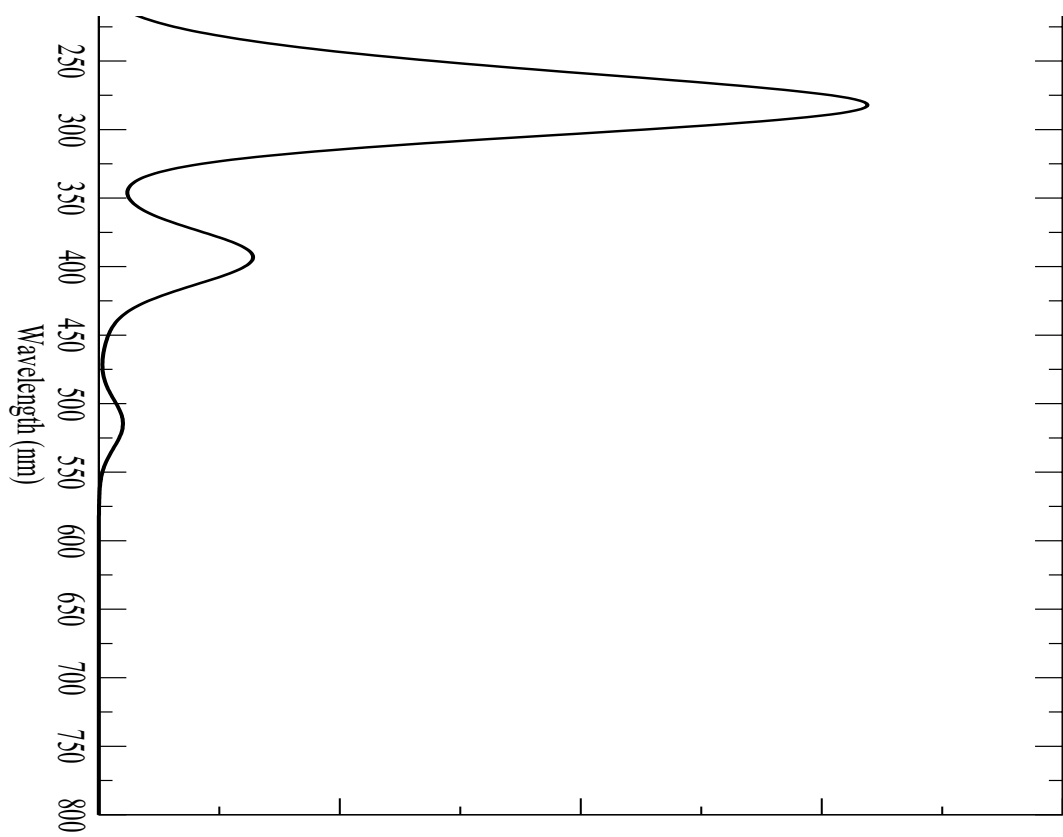

Figure S7: spectra of 1-Zn

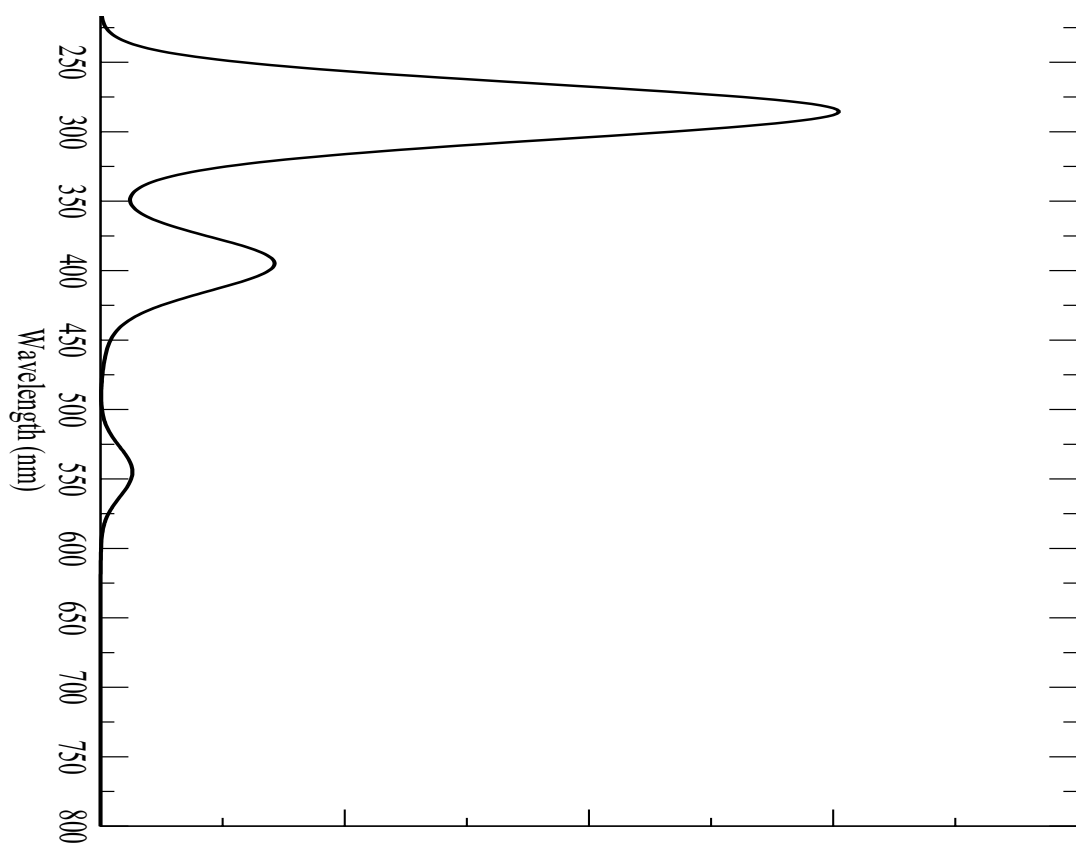

Figure S8: spectra of **1-Rh**

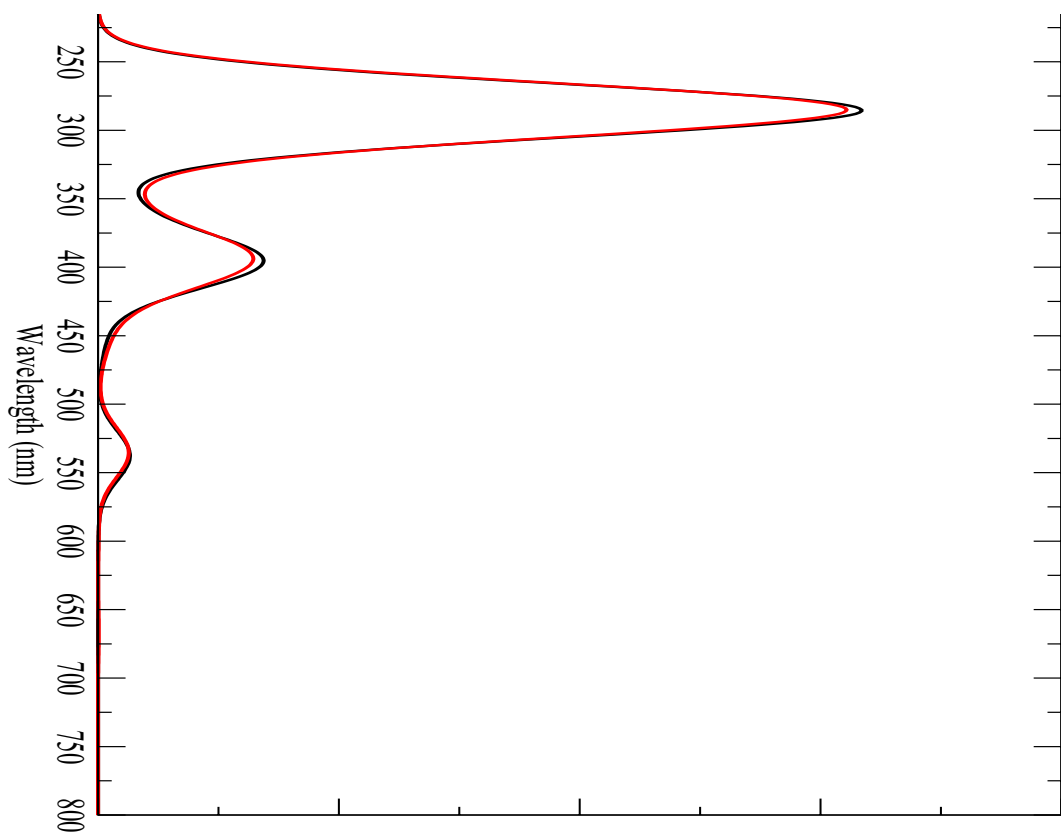

Figure S9: spectra of **1-Pd**, in black without SOC and in red with SOC

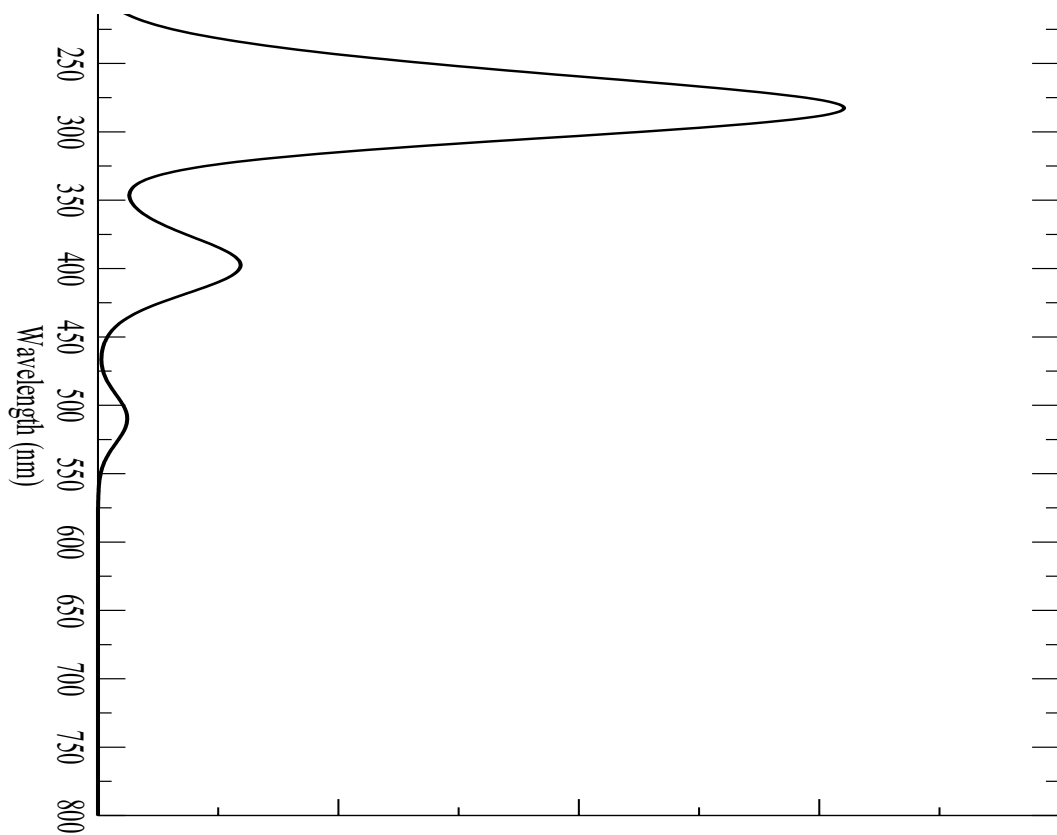

Figure S10: spectra of **1-Cd**

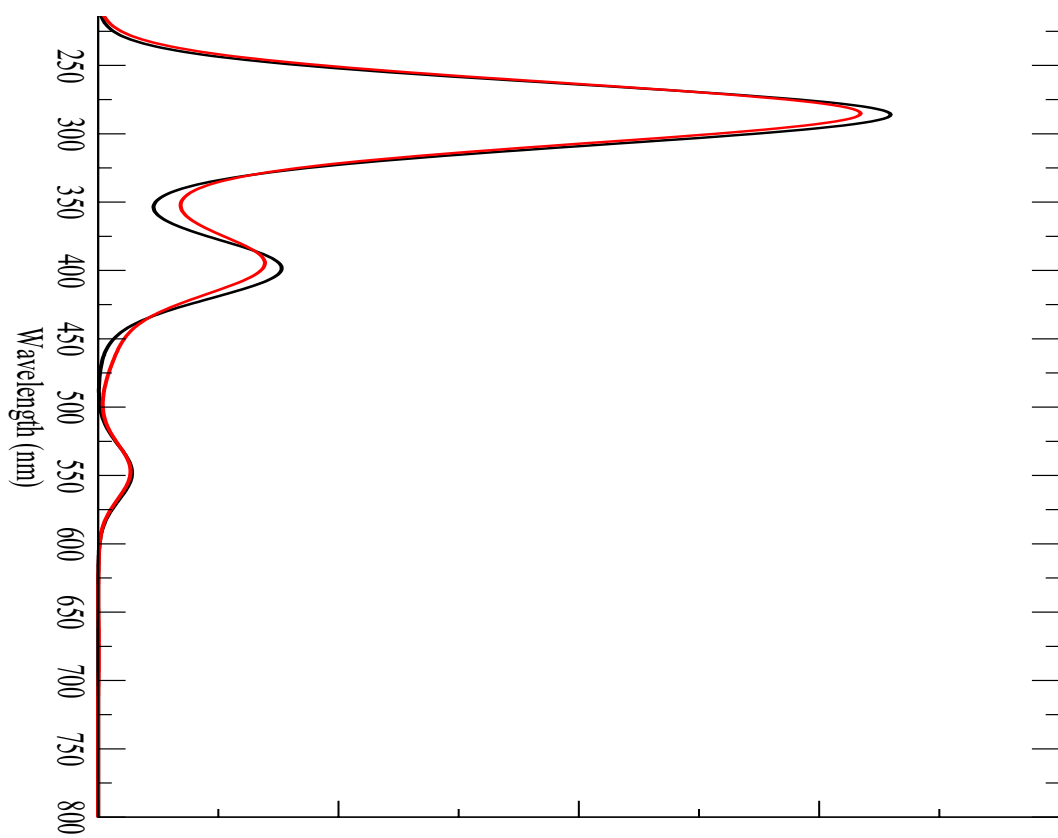

Figure S11: spectra of **1-Pt**, in black without SOC and in red with SOC

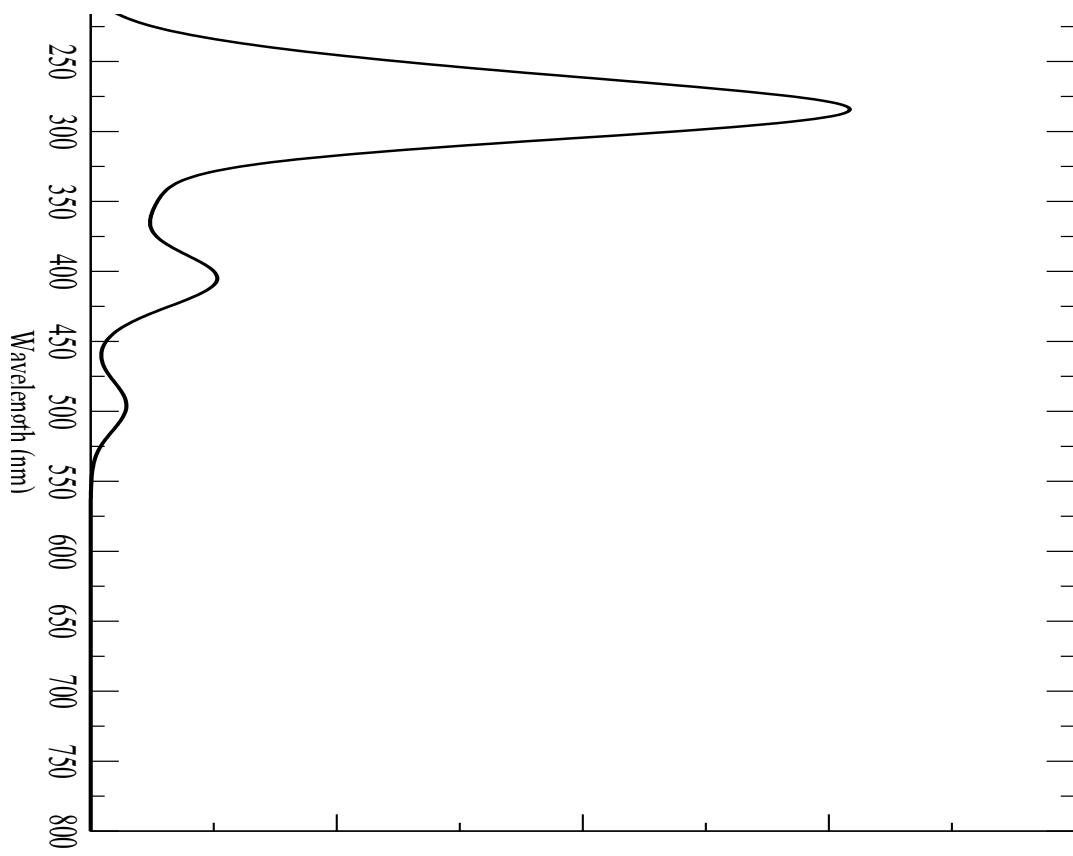

Figure S12: spectra of **1-Au(I)**

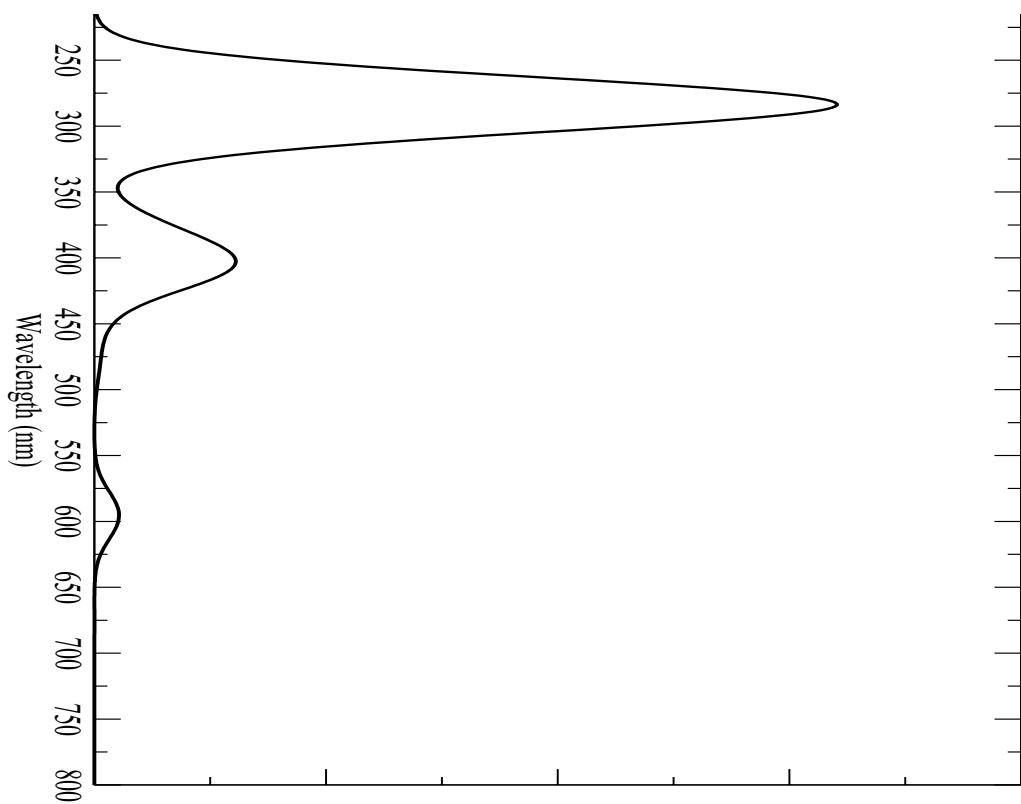

Figure S13: spectra of 1-Au(III)

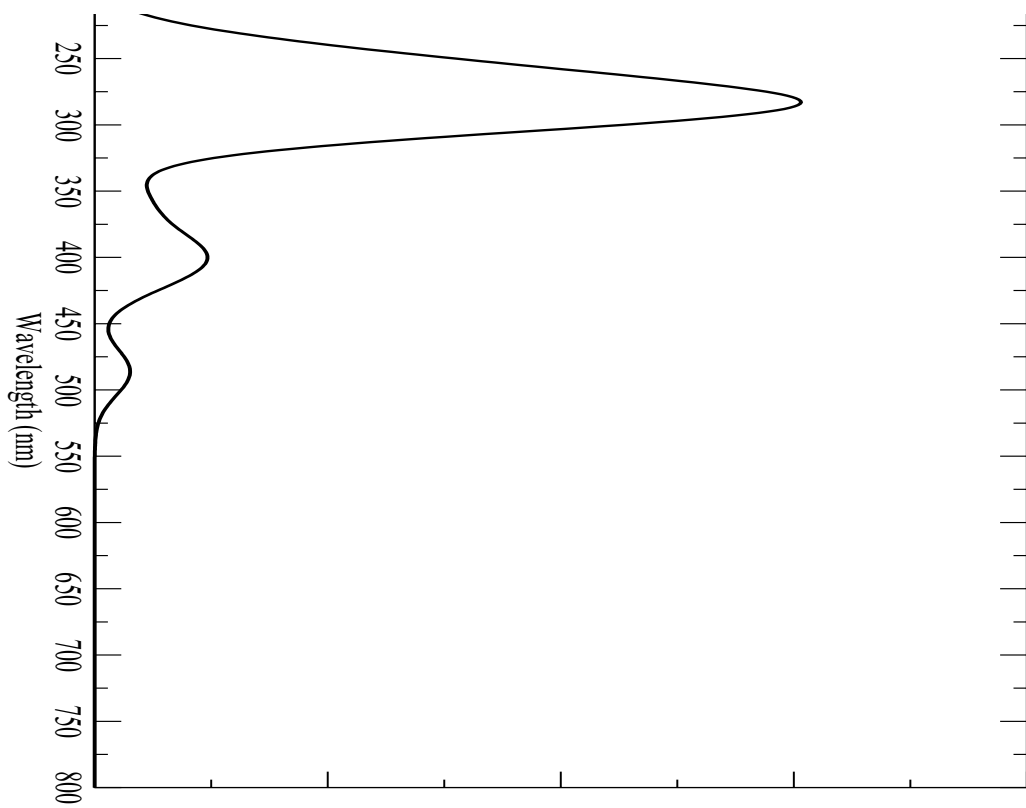

Figure S14: spectra of **1-Hg**



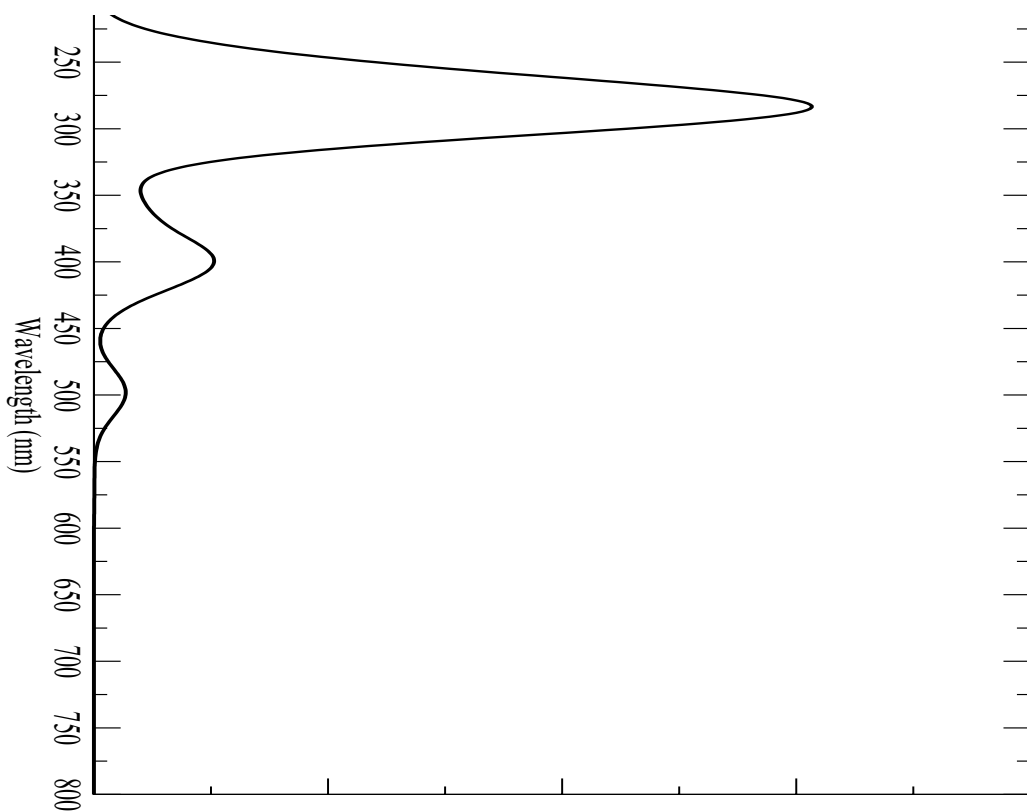

Figure S15: spectra of **1-Pb**

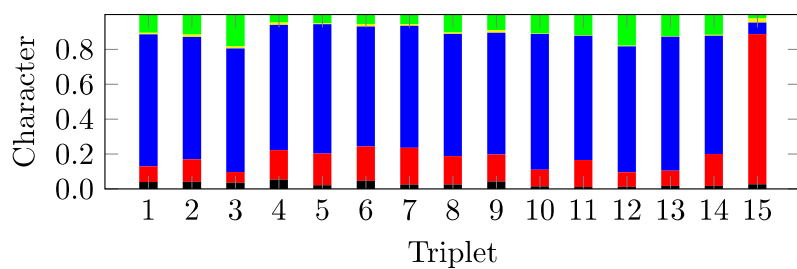

Figure S16: Character of the low-lying triplet states ( $T_1$ - $T_{15}$ ) of **1**

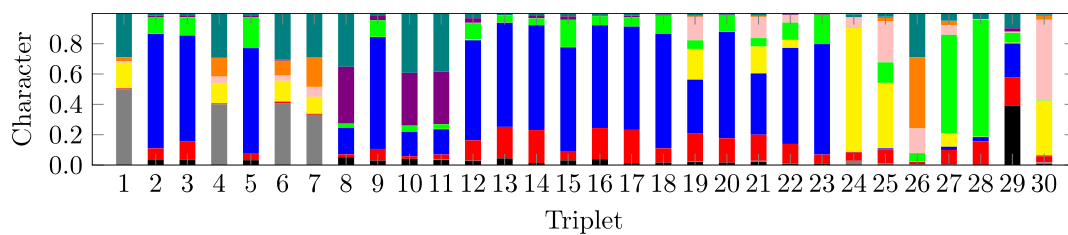

Figure S17: Character of the low-lying triplet states ( $T_1$ - $T_{30}$ ) of **1-Pd**

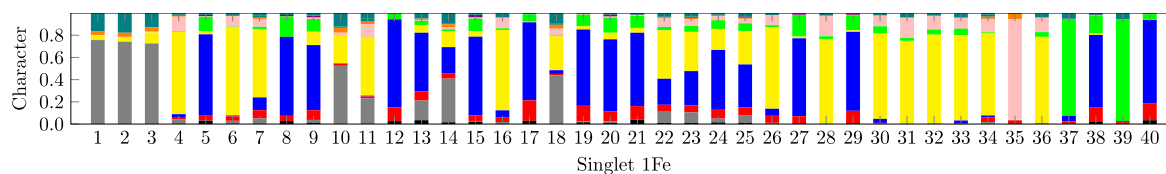

Figure S18: Character of the low-lying singlet states of **1-Fe**

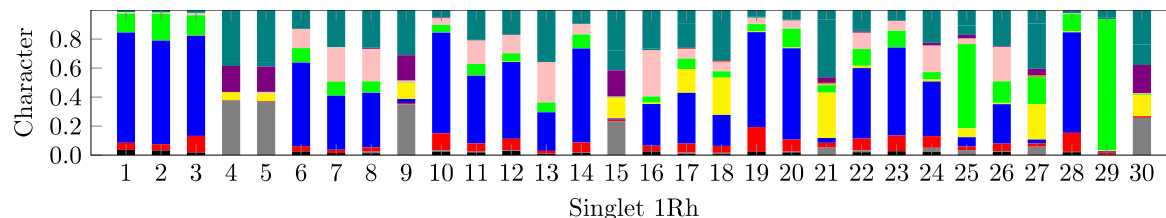

Figure S19: Character of the low-lying singlet states of **1-Rh**

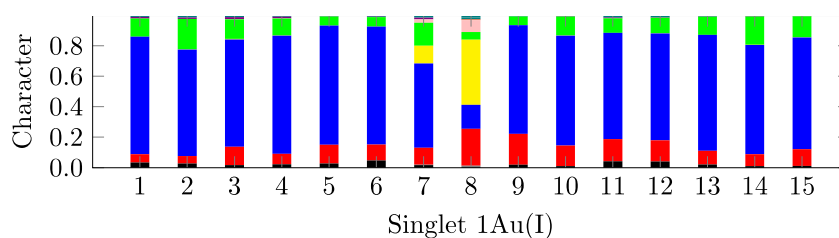

Figure S20: Character of the low-lying singlet states of **1-Au(I)**

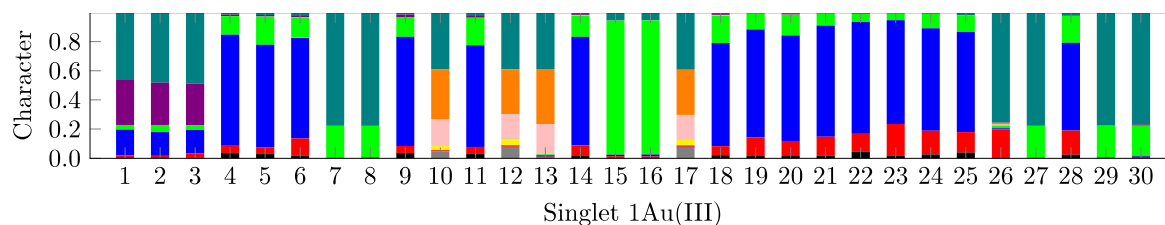

Figure S21: Character of the low-lying singlet states of **1-Au(III)**

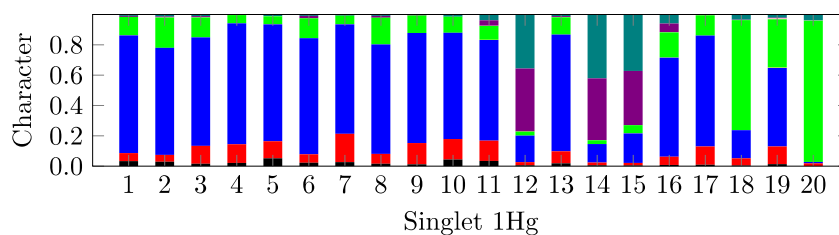

Figure S22: Character of the low-lying singlet states of **1-Hg**

The color code for figures S16 and S17: blue for  $M_{Ru}LCT$ ; green for  $LLCT$ ; red for  $LC$ ; black and grey for  $MC$  (Ru or Pd); pink for  $XLCT$ ; yellow for  $M_{Pd}LCT$ ; orange for  $XM_{Pd}CT$ ; violet for  $M_{Ru}M_{Pd}CT$ ; teal for other transitions.

Table S1: Energy (in Ev), oscillator strength and nature of the singlet states of 1

| State | Energy | Oscillator | M <sub>0</sub> C | LC     | M <sub>0</sub> LCT | LLCT   | Other  |
|-------|--------|------------|------------------|--------|--------------------|--------|--------|
| 1     | 2.391  | 0.00E+00   | 3.27%            | 5.75%  | 78.43%             | 11.85% | 0.70%  |
| 2     | 2.550  | 3.00E-03   | 2.79%            | 5.19%  | 71.81%             | 19.30% | 0.91%  |
| 3     | 2.686  | 1.76E-01   | 1.62%            | 12.24% | 72.90%             | 12.66% | 0.58%  |
| 4     | 2.733  | 3.00E-03   | 2.29%            | 11.96% | 79.23%             | 6.03%  | 0.50%  |
| 5     | 2.765  | 5.00E-03   | 5.09%            | 11.24% | 76.66%             | 5.91%  | 1.10%  |
| 6     | 2.880  | 7.50E-02   | 2.74%            | 18.21% | 72.24%             | 5.93%  | 0.87%  |
| 7     | 2.940  | 3.00E-03   | 2.93%            | 14.73% | 71.39%             | 9.98%  | 0.97%  |
| 8     | 2.979  | 2.01E-01   | 4.19%            | 14.51% | 70.48%             | 9.50%  | 1.33%  |
| 9     | 3.104  | 3.40E-02   | 1.48%            | 6.74%  | 78.88%             | 12.56% | 0.34%  |
| 10    | 3.164  | 1.18E-01   | 2.36%            | 16.20% | 72.28%             | 8.28%  | 0.88%  |
| 11    | 3.252  | 1.10E-02   | 1.40%            | 6.80%  | 72.12%             | 19.21% | 0.47%  |
| 12    | 3.318  | 3.00E-03   | 1.65%            | 9.05%  | 76.47%             | 12.34% | 0.49%  |
| 13    | 3.451  | 0.00E+00   | 1.02%            | 6.88%  | 73.98%             | 17.72% | 0.39%  |
| 14    | 3.540  | 1.04E-01   | 0.99%            | 11.97% | 73.47%             | 13.23% | 0.35%  |
| 15    | 3.567  | 1.41E-01   | 1.01%            | 10.66% | 74.68%             | 13.13% | 0.53%  |
| 16    | 3.664  | 4.00E-03   | 1.39%            | 14.00% | 77.63%             | 6.61%  | 0.37%  |
| 17    | 3.816  | 4.80E-02   | 1.71%            | 19.53% | 72.17%             | 6.11%  | 0.49%  |
| 18    | 3.838  | 1.00E-03   | 2.46%            | 13.96% | 75.66%             | 7.35%  | 0.57%  |
| 19    | 3.875  | 3.30E-02   | 2.46%            | 17.07% | 69.33%             | 10.40% | 0.75%  |
| 20    | 3.904  | 1.00E-03   | 0.05%            | 3.99%  | 3.24%              | 89.90% | 2.82%  |
| 21    | 3.943  | 4.00E-03   | 13.30%           | 12.43% | 65.71%             | 5.87%  | 2.69%  |
| 22    | 3.950  | 1.20E-02   | 0.69%            | 4.82%  | 2.43%              | 89.28% | 2.78%  |
| 23    | 3.956  | 4.00E-03   | 43.71%           | 5.59%  | 37.44%             | 4.53%  | 8.73%  |
| 24    | 3.964  | 6.40E-02   | 6.12%            | 11.44% | 75.20%             | 5.97%  | 1.28%  |
| 25    | 3.973  | 0.00E+00   | 40.51%           | 6.66%  | 40.72%             | 3.92%  | 8.20%  |
| 26    | 4.003  | 4.00E-03   | 0.92%            | 22.01% | 70.75%             | 5.79%  | 0.53%  |
| 27    | 4.010  | 1.12E-01   | 4.01%            | 16.26% | 66.25%             | 12.13% | 1.35%  |
| 28    | 4.072  | 2.00E-02   | 11.21%           | 11.48% | 64.59%             | 9.73%  | 2.99%  |
| 29    | 4.087  | 1.00E-03   | 36.54%           | 8.06%  | 41.10%             | 4.88%  | 9.41%  |
| 30    | 4.102  | 1.60E-02   | 8.04%            | 27.97% | 56.32%             | 4.94%  | 2.74%  |
| 31    | 4.104  | 7.00E-03   | 1.40%            | 25.28% | 62.77%             | 9.53%  | 1.03%  |
| 32    | 4.161  | 1.00E-03   | 0.06%            | 90.90% | 2.05%              | 4.16%  | 2.84%  |
| 33    | 4.234  | 2.83E-01   | 0.51%            | 81.80% | 11.74%             | 3.71%  | 2.23%  |
| 34    | 4.279  | 4.57E-01   | 0.18%            | 87.51% | 6.35%              | 3.37%  | 2.58%  |
| 35    | 4.302  | 1.29E+00   | 0.53%            | 81.95% | 10.66%             | 1.97%  | 4.89%  |
| 36    | 4.332  | 2.86E-01   | 0.24%            | 86.41% | 6.04%              | 2.10%  | 5.22%  |
| 37    | 4.475  | 2.20E-02   | 5.69%            | 15.50% | 61.25%             | 14.40% | 3.17%  |
| 38    | 4.543  | 1.70E-02   | 2.95%            | 11.68% | 4.88%              | 77.39% | 3.10%  |
| 39    | 4.562  | 7.00E-03   | 18.27%           | 56.68% | 11.84%             | 6.80%  | 6.41%  |
| 40    | 4.566  | 1.00E-03   | 46.67%           | 5.95%  | 29.20%             | 6.31%  | 11.86% |
| 41    | 4.581  | 2.80E-02   | 1.82%            | 21.34% | 1.76%              | 72.23% | 2.84%  |
| 42    | 4.591  | 1.00E-02   | 29.04%           | 29.48% | 18.43%             | 14.74% | 8.30%  |
| 43    | 4.697  | 0.00E+00   | 44.83%           | 6.69%  | 30.51%             | 4.75%  | 13.22% |
| 44    | 4.760  | 1.01E+00   | 0.09%            | 87.34% | 1.55%              | 8.02%  | 2.99%  |
| 45    | 4.798  | 0.00E+00   | 0.21%            | 88.52% | 2.48%              | 6.66%  | 2.13%  |
| 46    | 4.800  | 6.00E-03   | 0.01%            | 3.74%  | 0.38%              | 94.66% | 1.22%  |
| 47    | 4.846  | 4.00E-03   | 0.02%            | 3.27%  | 1.00%              | 94.51% | 1.20%  |
| 48    | 4.927  | 1.60E-02   | 0.06%            | 92.96% | 1.72%              | 3.75%  | 1.51%  |
| 49    | 4.986  | 4.00E-03   | 1.57%            | 8.46%  | 73.22%             | 15.88% | 0.86%  |
| 50    | 5.020  | 6.20E-02   | 0.03%            | 8.85%  | 0.67%              | 87.70% | 2.75%  |
| 51    | 5.050  | 1.10E-02   | 0.18%            | 72.63% | 8.75%              | 17.22% | 1.23%  |
| 52    | 5.057  | 1.00E-03   | 0.87%            | 32.00% | 53.38%             | 13.07% | 0.68%  |
| 53    | 5.063  | 1.10E-02   | 0.12%            | 18.42% | 3.18%              | 75.59% | 2.70%  |
| 54    | 5.076  | 2.50E-02   | 0.88%            | 9.47%  | 45.59%             | 41.97% | 2.09%  |
| 55    | 5.096  | 1.60E-02   | 0.57%            | 13.72% | 20.11%             | 61.82% | 3.78%  |
| 56    | 5.107  | 5.80E-02   | 0.01%            | 83.05% | 3.69%              | 11.80% | 1.44%  |
| 57    | 5.128  | 2.00E-03   | 0.14%            | 17.67% | 2.79%              | 74.43% | 4.97%  |
| 58    | 5.202  | 4.30E-02   | 0.12%            | 65.80% | 22.25%             | 10.71% | 1.12%  |
| 59    | 5.203  | 0.00E+00   | 1.19%            | 51.35% | 38.94%             | 7.27%  | 1.25%  |
| 60    | 5.227  | 9.00E-03   | 0.49%            | 56.33% | 19.54%             | 21.76% | 1.88%  |
| 61    | 5.258  | 4.20E-02   | 0.03%            | 90.26% | 4.46%              | 2.92%  | 2.34%  |
| 62    | 5.259  | 0.00E+00   | 0.05%            | 23.08% | 1.49%              | 72.94% | 2.44%  |
| 63    | 5.279  | 3.00E-03   | 0.67%            | 39.88% | 30.67%             | 27.47% | 1.31%  |
| 64    | 5.297  | 0.00E+00   | 0.22%            | 68.34% | 14.98%             | 14.26% | 2.21%  |
| 65    | 5.325  | 2.30E-02   | 0.29%            | 32.54% | 15.47%             | 49.19% | 2.52%  |
| 66    | 5.333  | 7.90E-02   | 0.06%            | 15.17% | 4.01%              | 78.18% | 2.58%  |
| 67    | 5.341  | 3.60E-02   | 0.29%            | 30.02% | 57.70%             | 11.31% | 0.69%  |
| 68    | 5.374  | 2.80E-02   | 0.76%            | 37.39% | 51.91%             | 8.65%  | 1.30%  |
| 69    | 5.395  | 2.80E-02   | 0.68%            | 32.40% | 53.67%             | 12.48% | 0.77%  |
| 70    | 5.400  | 1.00E-03   | 0.02%            | 96.15% | 1.10%              | 1.58%  | 1.15%  |
| 71    | 5.429  | 2.50E-02   | 0.11%            | 78.97% | 12.92%             | 6.96%  | 1.04%  |
| 72    | 5.452  | 5.40E-02   | 0.11%            | 15.44% | 5.91%              | 75.73% | 2.81%  |
| 73    | 5.459  | 2.00E-03   | 0.16%            | 24.18% | 31.14%             | 43.31% | 1.21%  |
| 74    | 5.469  | 7.00E-03   | 0.15%            | 21.21% | 36.18%             | 41.48% | 0.99%  |
| 75    | 5.485  | 1.12E-01   | 0.23%            | 41.77% | 17.80%             | 38.29% | 1.90%  |
| 76    | 5.500  | 0.00E+00   | 2.37%            | 19.58% | 49.67%             | 27.11% | 1.27%  |
| 77    | 5.530  | 2.00E-03   | 10.75%           | 14.87% | 18.87%             | 49.73% | 5.78%  |
| 78    | 5.542  | 0.00E+00   | 15.46%           | 10.35% | 29.70%             | 38.35% | 6.15%  |
| 79    | 5.544  | 3.00E-03   | 0.23%            | 82.15% | 1.86%              | 12.66% | 3.10%  |
| 80    | 5.575  | 1.38E-01   | 0.85%            | 35.60% | 7.86%              | 52.91% | 2.78%  |

Table S2: Energy (in Ev), oscillator strength and nature of the singlet states of 1-Ca

| State | Energy | Oscillator | M <sub>0</sub> C | M <sub>0</sub> C | LC     | M <sub>0</sub> LCT | M <sub>0</sub> LCT | LLCT   | XLCT  | XMCT  | M <sub>0</sub> M <sub>0</sub> CT | M <sub>0</sub> M <sub>0</sub> CT | Other |
|-------|--------|------------|------------------|------------------|--------|--------------------|--------------------|--------|-------|-------|----------------------------------|----------------------------------|-------|
| 1     | 2.170  | 0.00E+00   | 3.36%            | 0.00%            | 5.37%  | 77.67%             | 0.03%              | 12.26% | 0.01% | 0.00% | 0.36%                            | 0.00%                            | 0.95% |
| 2     | 2.335  | 2.00E-03   | 2.83%            | 0.00%            | 4.92%  | 71.57%             | 0.02%              | 19.08% | 0.01% | 0.00% | 0.39%                            | 0.00%                            | 1.19% |
| 3     | 2.503  | 1.24E-01   | 1.53%            | 0.00%            | 11.56% | 71.55%             | 0.01%              | 13.76% | 0.05% | 0.01% | 0.53%                            | 0.00%                            | 1.00% |
| 4     | 2.823  | 4.00E-03   | 2.80%            | 0.00%            | 12.39% | 78.83%             | 0.02%              | 5.35%  | 0.01% | 0.00% | 0.01%                            | 0.00%                            | 0.60% |
| 5     | 2.843  | 3.00E-03   | 5.02%            | 0.00%            | 11.36% | 77.15%             | 0.02%              | 5.40%  | 0.01% | 0.00% | 0.01%                            | 0.00%                            | 1.04% |

|    |       |          |        |       |        |        |       |        |        |       |       |       |        |
|----|-------|----------|--------|-------|--------|--------|-------|--------|--------|-------|-------|-------|--------|
| 6  | 2.891 | 2.40E-02 | 2.10%  | 0.00% | 5.67%  | 77.57% | 0.03% | 12.83% | 0.01%  | 0.00% | 0.87% | 0.00% | 0.94%  |
| 7  | 2.972 | 5.90E-02 | 3.15%  | 0.00% | 17.43% | 72.11% | 0.01% | 6.27%  | 0.01%  | 0.00% | 0.02% | 0.00% | 1.01%  |
| 8  | 3.016 | 6.00E-03 | 1.95%  | 0.00% | 14.29% | 72.86% | 0.01% | 10.17% | 0.01%  | 0.00% | 0.06% | 0.00% | 0.64%  |
| 9  | 3.033 | 5.70E-02 | 1.34%  | 0.00% | 8.52%  | 73.10% | 0.01% | 15.55% | 0.01%  | 0.00% | 0.64% | 0.00% | 0.84%  |
| 10 | 3.078 | 1.95E-01 | 4.32%  | 0.00% | 12.75% | 70.12% | 0.01% | 11.15% | 0.01%  | 0.00% | 0.16% | 0.00% | 1.48%  |
| 11 | 3.105 | 1.62E-01 | 2.99%  | 0.00% | 14.45% | 70.67% | 0.01% | 10.11% | 0.01%  | 0.00% | 0.47% | 0.00% | 1.28%  |
| 12 | 3.155 | 2.80E-02 | 1.80%  | 0.00% | 7.24%  | 77.78% | 0.02% | 12.43% | 0.01%  | 0.00% | 0.14% | 0.00% | 0.59%  |
| 13 | 3.304 | 3.70E-02 | 1.06%  | 0.00% | 6.92%  | 73.66% | 0.02% | 17.80% | 0.01%  | 0.00% | 0.11% | 0.00% | 0.43%  |
| 14 | 3.368 | 9.00E-02 | 0.90%  | 0.00% | 11.84% | 72.72% | 0.01% | 13.98% | 0.01%  | 0.00% | 0.13% | 0.00% | 0.42%  |
| 15 | 3.527 | 8.00E-02 | 1.75%  | 0.00% | 13.20% | 68.57% | 0.01% | 15.06% | 0.01%  | 0.00% | 0.11% | 0.00% | 1.29%  |
| 16 | 3.588 | 5.00E-03 | 0.14%  | 0.00% | 2.85%  | 3.79%  | 0.00% | 89.74% | 0.01%  | 0.00% | 0.00% | 0.00% | 3.47%  |
| 17 | 3.632 | 6.00E-03 | 0.06%  | 0.00% | 2.33%  | 1.14%  | 0.00% | 92.88% | 0.04%  | 0.00% | 0.00% | 0.00% | 3.54%  |
| 18 | 3.733 | 7.00E-03 | 1.36%  | 0.00% | 15.35% | 76.89% | 0.02% | 5.82%  | 0.01%  | 0.00% | 0.07% | 0.00% | 0.48%  |
| 19 | 3.891 | 3.60E-02 | 5.26%  | 0.00% | 18.45% | 69.94% | 0.01% | 5.07%  | 0.01%  | 0.00% | 0.07% | 0.00% | 1.19%  |
| 20 | 3.913 | 2.00E-03 | 11.33% | 0.00% | 12.16% | 66.64% | 0.01% | 7.45%  | 0.03%  | 0.00% | 0.06% | 0.00% | 2.32%  |
| 21 | 3.931 | 1.00E-02 | 47.13% | 0.00% | 5.48%  | 33.97% | 0.01% | 3.37%  | 0.05%  | 0.00% | 0.14% | 0.01% | 9.84%  |
| 22 | 3.945 | 4.00E-03 | 2.04%  | 0.00% | 21.65% | 68.51% | 0.02% | 6.81%  | 0.03%  | 0.00% | 0.06% | 0.00% | 0.89%  |
| 23 | 3.954 | 6.00E-03 | 0.03%  | 0.01% | 1.31%  | 0.05%  | 1.14% | 0.12%  | 93.96% | 3.08% | 0.00% | 0.03% | 0.27%  |
| 24 | 3.968 | 0.00E+00 | 0.01%  | 0.01% | 1.21%  | 0.04%  | 1.05% | 0.07%  | 94.25% | 3.08% | 0.00% | 0.03% | 0.26%  |
| 25 | 3.984 | 3.00E-03 | 41.78% | 0.00% | 6.62%  | 39.20% | 0.01% | 3.93%  | 0.02%  | 0.00% | 0.06% | 0.00% | 8.39%  |
| 26 | 4.013 | 2.00E-03 | 0.00%  | 0.01% | 0.71%  | 0.09%  | 1.37% | 0.05%  | 94.39% | 3.10% | 0.00% | 0.03% | 0.25%  |
| 27 | 4.014 | 8.00E-03 | 0.01%  | 0.01% | 0.77%  | 0.34%  | 1.51% | 0.09%  | 93.91% | 3.08% | 0.00% | 0.04% | 0.24%  |
| 28 | 4.042 | 3.00E-03 | 2.17%  | 0.00% | 15.33% | 75.61% | 0.02% | 5.86%  | 0.40%  | 0.01% | 0.03% | 0.00% | 0.58%  |
| 29 | 4.055 | 2.70E-02 | 11.79% | 0.00% | 11.82% | 67.26% | 0.01% | 6.03%  | 0.01%  | 0.00% | 0.04% | 0.00% | 3.04%  |
| 30 | 4.075 | 9.90E-02 | 24.97% | 0.00% | 9.70%  | 53.33% | 0.01% | 5.48%  | 0.01%  | 0.00% | 0.05% | 0.00% | 6.45%  |
| 31 | 4.094 | 5.00E-03 | 2.68%  | 0.00% | 25.52% | 65.69% | 0.01% | 5.13%  | 0.01%  | 0.00% | 0.04% | 0.00% | 0.92%  |
| 32 | 4.099 | 6.40E-02 | 14.99% | 0.00% | 23.34% | 48.98% | 0.01% | 8.14%  | 0.01%  | 0.00% | 0.07% | 0.00% | 4.47%  |
| 33 | 4.166 | 7.70E-02 | 1.37%  | 0.00% | 37.18% | 43.97% | 0.01% | 16.50% | 0.02%  | 0.00% | 0.02% | 0.00% | 0.95%  |
| 34 | 4.168 | 8.00E-03 | 5.41%  | 0.00% | 16.78% | 65.58% | 0.01% | 10.72% | 0.02%  | 0.00% | 0.01% | 0.00% | 1.46%  |
| 35 | 4.172 | 1.55E-01 | 2.16%  | 0.00% | 36.16% | 53.99% | 0.01% | 6.47%  | 0.01%  | 0.00% | 0.02% | 0.00% | 1.17%  |
| 36 | 4.179 | 3.00E-03 | 0.00%  | 0.03% | 0.14%  | 0.03%  | 3.92% | 0.03%  | 92.44% | 3.06% | 0.00% | 0.10% | 0.23%  |
| 37 | 4.232 | 1.40E-02 | 0.62%  | 0.00% | 17.88% | 24.87% | 0.01% | 54.25% | 0.01%  | 0.00% | 0.00% | 0.00% | 2.35%  |
| 38 | 4.262 | 6.00E-02 | 0.13%  | 0.00% | 44.64% | 7.73%  | 0.00% | 45.29% | 0.03%  | 0.00% | 0.01% | 0.00% | 2.16%  |
| 39 | 4.274 | 9.50E-02 | 0.42%  | 0.00% | 59.99% | 7.41%  | 0.00% | 27.01% | 0.01%  | 0.00% | 0.00% | 0.00% | 5.16%  |
| 40 | 4.296 | 1.29E-01 | 0.24%  | 0.00% | 58.79% | 4.53%  | 0.00% | 31.13% | 0.02%  | 0.00% | 0.01% | 0.00% | 5.29%  |
| 41 | 4.337 | 9.69E-01 | 0.62%  | 0.00% | 64.62% | 20.68% | 0.01% | 10.02% | 0.03%  | 0.00% | 0.01% | 0.00% | 4.01%  |
| 42 | 4.340 | 9.11E-01 | 0.56%  | 0.00% | 64.92% | 19.23% | 0.01% | 11.11% | 0.04%  | 0.00% | 0.01% | 0.00% | 4.14%  |
| 43 | 4.505 | 1.60E-02 | 7.11%  | 0.00% | 15.17% | 62.01% | 0.02% | 12.18% | 0.10%  | 0.01% | 0.21% | 0.00% | 3.19%  |
| 44 | 4.520 | 1.60E-02 | 0.01%  | 0.00% | 2.45%  | 0.40%  | 0.00% | 95.66% | 0.03%  | 0.00% | 0.00% | 0.00% | 1.46%  |
| 45 | 4.561 | 3.00E-03 | 10.08% | 0.06% | 5.39%  | 6.85%  | 6.11% | 3.36%  | 62.86% | 2.15% | 0.02% | 0.15% | 2.95%  |
| 46 | 4.562 | 3.00E-03 | 33.40% | 0.02% | 5.62%  | 22.71% | 1.82% | 8.22%  | 18.67% | 0.64% | 0.07% | 0.05% | 8.77%  |
| 47 | 4.565 | 0.00E+00 | 4.93%  | 0.00% | 2.72%  | 4.86%  | 0.01% | 84.82% | 0.09%  | 0.00% | 0.02% | 0.00% | 2.55%  |
| 48 | 4.585 | 2.00E-03 | 47.14% | 0.00% | 4.84%  | 30.33% | 0.13% | 4.14%  | 1.47%  | 0.05% | 0.14% | 0.01% | 11.75% |
| 49 | 4.632 | 6.00E-03 | 0.08%  | 0.01% | 0.81%  | 0.08%  | 1.17% | 0.17%  | 93.72% | 3.64% | 0.00% | 0.03% | 0.28%  |
| 50 | 4.641 | 0.00E+00 | 0.02%  | 0.01% | 0.90%  | 0.04%  | 1.08% | 0.12%  | 93.81% | 3.70% | 0.00% | 0.03% | 0.28%  |
| 51 | 4.683 | 1.10E-02 | 0.34%  | 0.01% | 2.58%  | 0.29%  | 1.29% | 0.33%  | 90.96% | 3.73% | 0.00% | 0.04% | 0.42%  |
| 52 | 4.689 | 9.00E-03 | 4.89%  | 0.01% | 2.00%  | 3.55%  | 1.36% | 0.75%  | 82.44% | 3.23% | 0.02% | 0.04% | 1.71%  |
| 53 | 4.691 | 1.40E-02 | 33.22% | 0.00% | 12.93% | 23.84% | 0.47% | 6.14%  | 12.48% | 0.45% | 0.11% | 0.02% | 10.36% |
| 54 | 4.702 | 8.74E-01 | 1.71%  | 0.01% | 81.33% | 2.01%  | 0.21% | 8.61%  | 2.02%  | 0.06% | 0.01% | 0.01% | 4.04%  |
| 55 | 4.721 | 6.20E-02 | 3.61%  | 0.02% | 69.57% | 5.25%  | 2.63% | 13.47% | 1.26%  | 0.04% | 0.02% | 0.07% | 4.07%  |
| 56 | 4.842 | 0.00E+00 | 0.00%  | 0.00% | 0.09%  | 0.08%  | 1.20% | 0.79%  | 94.43% | 3.33% | 0.00% | 0.04% | 0.04%  |
| 57 | 4.852 | 2.00E-03 | 0.04%  | 0.04% | 0.25%  | 1.31%  | 3.79% | 0.34%  | 90.17% | 3.68% | 0.01% | 0.11% | 0.26%  |
| 58 | 4.856 | 0.00E+00 | 1.41%  | 0.00% | 5.31%  | 54.65% | 0.30% | 15.30% | 20.55% | 0.71% | 0.52% | 0.01% | 1.25%  |
| 59 | 4.856 | 0.00E+00 | 0.38%  | 0.00% | 1.34%  | 13.33% | 0.95% | 4.10%  | 76.67% | 2.73% | 0.13% | 0.03% | 0.33%  |
| 60 | 4.869 | 0.00E+00 | 0.00%  | 0.00% | 0.43%  | 0.10%  | 1.24% | 0.55%  | 93.65% | 3.92% | 0.00% | 0.05% | 0.05%  |
| 61 | 4.881 | 0.00E+00 | 0.00%  | 0.00% | 0.19%  | 0.02%  | 1.20% | 0.55%  | 94.05% | 3.90% | 0.00% | 0.05% | 0.04%  |
| 62 | 4.895 | 1.00E-03 | 0.01%  | 0.00% | 0.51%  | 0.51%  | 1.34% | 0.62%  | 94.71% | 2.15% | 0.00% | 0.03% | 0.06%  |
| 63 | 4.903 | 1.00E-03 | 0.00%  | 0.00% | 0.49%  | 0.07%  | 1.20% | 0.46%  | 95.44% | 2.26% | 0.00% | 0.03% | 0.05%  |
| 64 | 4.933 | 5.00E-03 | 0.01%  | 0.00% | 0.68%  | 0.75%  | 1.36% | 0.64%  | 93.26% | 3.18% | 0.01% | 0.05% | 0.07%  |
| 65 | 4.936 | 5.40E-02 | 0.70%  | 0.00% | 17.89% | 49.74% | 0.27% | 11.42% | 17.83% | 0.57% | 0.40% | 0.01% | 1.17%  |
| 66 | 4.937 | 7.00E-03 | 0.10%  | 0.00% | 2.76%  | 6.94%  | 1.16% | 2.14%  | 83.88% | 2.71% | 0.06% | 0.04% | 0.21%  |
| 67 | 4.939 | 0.00E+00 | 0.07%  | 0.00% | 1.88%  | 4.35%  | 1.35% | 1.53%  | 87.70% | 2.90% | 0.03% | 0.04% | 0.14%  |
| 68 | 4.946 | 0.00E+00 | 0.01%  | 0.00% | 0.30%  | 0.45%  | 1.16% | 0.89%  | 93.96% | 3.15% | 0.00% | 0.04% | 0.04%  |
| 69 | 4.961 | 2.30E-02 | 1.45%  | 0.00% | 10.24% | 58.66% | 0.10% | 24.47% | 2.91%  | 0.14% | 0.42% | 0.01% | 1.60%  |
| 70 | 4.962 | 3.00E-03 | 0.28%  | 0.00% | 6.58%  | 9.40%  | 0.03% | 80.14% | 0.34%  | 0.02% | 0.07% | 0.00% | 3.14%  |
| 71 | 4.979 | 2.00E-03 | 0.00%  | 0.00% | 0.29%  | 0.12%  | 1.49% | 0.74%  | 94.38% | 2.89% | 0.00% | 0.05% | 0.04%  |
| 72 | 4.981 | 1.00E-03 | 0.01%  | 0.00% | 0.30%  | 0.34%  | 1.36% | 1.10%  | 93.93% | 2.87% | 0.00% | 0.04% | 0.06%  |
| 73 | 5.009 | 5.70E-02 | 0.08%  | 0.00% | 10.62% | 3.45%  | 0.18% | 81.64% | 0.60%  | 0.03% | 0.04% | 0.01% | 3.36%  |
| 74 | 5.042 | 3.90E-02 | 0.05%  | 0.00% | 88.75% | 2.03%  | 0.01% | 7.79%  | 0.10%  | 0.00% | 0.00% | 0.00% | 1.26%  |
| 75 | 5.069 | 0.00E+00 | 0.06%  | 0.00% | 4.49%  | 1.65%  | 2.69% | 25.47% | 62.25% | 2.13% | 0.01% | 0.09% | 1.16%  |
| 76 | 5.071 | 1.00E-03 | 0.15%  | 0.00% | 10.36% | 3.93%  | 1.41% | 50.14% | 30.62% | 1.09% | 0.02% | 0.05% | 2.24%  |
| 77 | 5.087 | 6.90E-02 | 0.01%  | 0.00% | 90.75% | 2.60%  | 0.13% | 4.68%  | 0.65%  | 0.03% | 0.00% | 0.00% | 1.15%  |
| 78 | 5.101 | 0.00E+00 | 0.00%  | 0.01% | 1.22%  | 0.18%  | 3.71% | 3.75%  | 87.49% | 3.30% | 0.00% | 0.13% | 0.20%  |
| 79 | 5.103 | 1.80E-02 | 0.11%  | 0.00% | 14.05% | 3.81%  | 0.27% | 73.53% | 4.76%  | 0.20% | 0.03% | 0.01% | 3.24%  |
| 80 | 5.143 | 1.00E-03 | 0.00%  | 0.00% | 0.11%  | 0.01%  | 3.96% | 0.11%  | 93.17% | 2.51% | 0.00% | 0.10% | 0.02%  |

Table S3: Energy (in Ev), oscillator strength and nature of the singlet states of 1-Mn

| State | Energy | Oscillator | M <sub>00</sub> C | M <sub>0</sub> C | LC | M <sub>00</sub> LCT | M <sub>0</sub> LCT | LLCT | XLCT | XMCT | M <sub>00</sub> M <sub>0</sub> CT | M <sub>0</sub> M <sub>0</sub> CT | Other |
|-------|--------|------------|-------------------|------------------|----|---------------------|--------------------|------|------|------|-----------------------------------|----------------------------------|-------|
| 1     | 2.076  | 6.24E-06   |                   |                  |    |                     |                    |      |      |      |                                   |                                  |       |
| 2     | 2.155  | 3.34E-05   |                   |                  |    |                     |                    |      |      |      |                                   |                                  |       |
| 3     | 2.161  | 1.46E-03   |                   |                  |    |                     |                    |      |      |      |                                   |                                  |       |
| 4     | 2.238  | 4.50E-05   |                   |                  |    |                     |                    |      |      |      |                                   |                                  |       |
| 5     | 2.304  | 6.70E-04   |                   |                  |    |                     |                    |      |      |      |                                   |                                  |       |
| 6     | 2.395  | 2.24E-03   |                   |                  |    |                     |                    |      |      |      |                                   |                                  |       |
| 7     | 2.504  | 8.25E-02   |                   |                  |    |                     |                    |      |      |      |                                   |                                  |       |
| 8     | 2.719  | 1.63E-04   |                   |                  |    |                     |                    |      |      |      |                                   |                                  |       |
| 9     | 2.721  | 1.37E-05   |                   |                  |    |                     |                    |      |      |      |                                   |                                  |       |
| 10    | 2.780  | 5.64E-04   |                   |                  |    |                     |                    |      |      |      |                                   |                                  |       |
| 11    | 2.785  | 7.24E-04   |                   |                  |    |                     |                    |      |      |      |                                   |                                  |       |
| 12    | 2.786  | 5.71E-04   |                   |                  |    |                     |                    |      |      |      |                                   |                                  |       |
| 13    | 2.827  | 9.16E-03   |                   |                  |    |                     |                    |      |      |      |                                   |                                  |       |

|     |       |          |  |  |  |  |  |  |  |  |  |  |  |
|-----|-------|----------|--|--|--|--|--|--|--|--|--|--|--|
| 14  | 2.838 | 9.29E-04 |  |  |  |  |  |  |  |  |  |  |  |
| 15  | 2.860 | 1.15E-03 |  |  |  |  |  |  |  |  |  |  |  |
| 16  | 2.872 | 4.21E-05 |  |  |  |  |  |  |  |  |  |  |  |
| 17  | 2.879 | 1.19E-02 |  |  |  |  |  |  |  |  |  |  |  |
| 18  | 2.934 | 4.18E-04 |  |  |  |  |  |  |  |  |  |  |  |
| 19  | 2.938 | 4.13E-04 |  |  |  |  |  |  |  |  |  |  |  |
| 20  | 2.956 | 7.96E-04 |  |  |  |  |  |  |  |  |  |  |  |
| 21  | 2.991 | 1.63E-02 |  |  |  |  |  |  |  |  |  |  |  |
| 22  | 3.020 | 1.56E-02 |  |  |  |  |  |  |  |  |  |  |  |
| 23  | 3.025 | 4.71E-03 |  |  |  |  |  |  |  |  |  |  |  |
| 24  | 3.083 | 7.63E-03 |  |  |  |  |  |  |  |  |  |  |  |
| 25  | 3.101 | 1.71E-03 |  |  |  |  |  |  |  |  |  |  |  |
| 26  | 3.117 | 1.77E-02 |  |  |  |  |  |  |  |  |  |  |  |
| 27  | 3.127 | 1.73E-01 |  |  |  |  |  |  |  |  |  |  |  |
| 28  | 3.151 | 1.04E-01 |  |  |  |  |  |  |  |  |  |  |  |
| 29  | 3.196 | 5.07E-04 |  |  |  |  |  |  |  |  |  |  |  |
| 30  | 3.228 | 7.68E-04 |  |  |  |  |  |  |  |  |  |  |  |
| 31  | 3.275 | 5.48E-02 |  |  |  |  |  |  |  |  |  |  |  |
| 32  | 3.325 | 3.83E-03 |  |  |  |  |  |  |  |  |  |  |  |
| 33  | 3.358 | 6.56E-02 |  |  |  |  |  |  |  |  |  |  |  |
| 34  | 3.372 | 5.34E-03 |  |  |  |  |  |  |  |  |  |  |  |
| 35  | 3.373 | 1.70E-02 |  |  |  |  |  |  |  |  |  |  |  |
| 36  | 3.396 | 2.17E-03 |  |  |  |  |  |  |  |  |  |  |  |
| 37  | 3.434 | 8.36E-04 |  |  |  |  |  |  |  |  |  |  |  |
| 38  | 3.458 | 9.05E-06 |  |  |  |  |  |  |  |  |  |  |  |
| 39  | 3.492 | 6.98E-03 |  |  |  |  |  |  |  |  |  |  |  |
| 40  | 3.524 | 6.53E-04 |  |  |  |  |  |  |  |  |  |  |  |
| 41  | 3.535 | 2.29E-02 |  |  |  |  |  |  |  |  |  |  |  |
| 42  | 3.535 | 2.01E-03 |  |  |  |  |  |  |  |  |  |  |  |
| 43  | 3.541 | 1.33E-02 |  |  |  |  |  |  |  |  |  |  |  |
| 44  | 3.565 | 2.99E-02 |  |  |  |  |  |  |  |  |  |  |  |
| 45  | 3.584 | 8.13E-03 |  |  |  |  |  |  |  |  |  |  |  |
| 46  | 3.589 | 5.59E-03 |  |  |  |  |  |  |  |  |  |  |  |
| 47  | 3.607 | 2.07E-03 |  |  |  |  |  |  |  |  |  |  |  |
| 48  | 3.612 | 6.96E-06 |  |  |  |  |  |  |  |  |  |  |  |
| 49  | 3.652 | 8.64E-04 |  |  |  |  |  |  |  |  |  |  |  |
| 50  | 3.677 | 4.84E-03 |  |  |  |  |  |  |  |  |  |  |  |
| 51  | 3.711 | 7.78E-06 |  |  |  |  |  |  |  |  |  |  |  |
| 52  | 3.738 | 1.41E-04 |  |  |  |  |  |  |  |  |  |  |  |
| 53  | 3.742 | 2.68E-05 |  |  |  |  |  |  |  |  |  |  |  |
| 54  | 3.747 | 1.66E-03 |  |  |  |  |  |  |  |  |  |  |  |
| 55  | 3.756 | 4.00E-04 |  |  |  |  |  |  |  |  |  |  |  |
| 56  | 3.761 | 2.10E-04 |  |  |  |  |  |  |  |  |  |  |  |
| 57  | 3.793 | 1.16E-03 |  |  |  |  |  |  |  |  |  |  |  |
| 58  | 3.853 | 3.02E-03 |  |  |  |  |  |  |  |  |  |  |  |
| 59  | 3.891 | 1.97E-03 |  |  |  |  |  |  |  |  |  |  |  |
| 60  | 3.901 | 1.50E-02 |  |  |  |  |  |  |  |  |  |  |  |
| 61  | 3.903 | 4.17E-04 |  |  |  |  |  |  |  |  |  |  |  |
| 62  | 3.913 | 2.85E-06 |  |  |  |  |  |  |  |  |  |  |  |
| 63  | 3.920 | 1.68E-03 |  |  |  |  |  |  |  |  |  |  |  |
| 64  | 3.923 | 1.31E-03 |  |  |  |  |  |  |  |  |  |  |  |
| 65  | 3.927 | 1.38E-02 |  |  |  |  |  |  |  |  |  |  |  |
| 66  | 3.932 | 2.23E-02 |  |  |  |  |  |  |  |  |  |  |  |
| 67  | 3.950 | 2.27E-05 |  |  |  |  |  |  |  |  |  |  |  |
| 68  | 3.953 | 4.11E-03 |  |  |  |  |  |  |  |  |  |  |  |
| 69  | 3.975 | 6.75E-03 |  |  |  |  |  |  |  |  |  |  |  |
| 70  | 3.978 | 1.55E-03 |  |  |  |  |  |  |  |  |  |  |  |
| 71  | 3.979 | 9.37E-04 |  |  |  |  |  |  |  |  |  |  |  |
| 72  | 3.984 | 2.80E-03 |  |  |  |  |  |  |  |  |  |  |  |
| 73  | 3.986 | 1.54E-03 |  |  |  |  |  |  |  |  |  |  |  |
| 74  | 4.013 | 1.53E-04 |  |  |  |  |  |  |  |  |  |  |  |
| 75  | 4.026 | 4.37E-06 |  |  |  |  |  |  |  |  |  |  |  |
| 76  | 4.039 | 6.68E-05 |  |  |  |  |  |  |  |  |  |  |  |
| 77  | 4.051 | 3.03E-03 |  |  |  |  |  |  |  |  |  |  |  |
| 78  | 4.065 | 3.91E-03 |  |  |  |  |  |  |  |  |  |  |  |
| 79  | 4.070 | 8.16E-04 |  |  |  |  |  |  |  |  |  |  |  |
| 80  | 4.087 | 2.19E-02 |  |  |  |  |  |  |  |  |  |  |  |
| 81  | 4.100 | 1.12E-03 |  |  |  |  |  |  |  |  |  |  |  |
| 82  | 4.123 | 1.93E-03 |  |  |  |  |  |  |  |  |  |  |  |
| 83  | 4.125 | 8.85E-02 |  |  |  |  |  |  |  |  |  |  |  |
| 84  | 4.142 | 7.87E-03 |  |  |  |  |  |  |  |  |  |  |  |
| 85  | 4.167 | 3.37E-03 |  |  |  |  |  |  |  |  |  |  |  |
| 86  | 4.174 | 1.26E-02 |  |  |  |  |  |  |  |  |  |  |  |
| 87  | 4.178 | 1.06E-02 |  |  |  |  |  |  |  |  |  |  |  |
| 88  | 4.182 | 2.91E-03 |  |  |  |  |  |  |  |  |  |  |  |
| 89  | 4.189 | 2.12E-02 |  |  |  |  |  |  |  |  |  |  |  |
| 90  | 4.214 | 6.32E-04 |  |  |  |  |  |  |  |  |  |  |  |
| 91  | 4.227 | 1.78E-03 |  |  |  |  |  |  |  |  |  |  |  |
| 92  | 4.235 | 2.52E-04 |  |  |  |  |  |  |  |  |  |  |  |
| 93  | 4.242 | 2.58E-03 |  |  |  |  |  |  |  |  |  |  |  |
| 94  | 4.255 | 6.53E-04 |  |  |  |  |  |  |  |  |  |  |  |
| 95  | 4.279 | 5.75E-04 |  |  |  |  |  |  |  |  |  |  |  |
| 96  | 4.280 | 7.35E-03 |  |  |  |  |  |  |  |  |  |  |  |
| 97  | 4.285 | 5.58E-05 |  |  |  |  |  |  |  |  |  |  |  |
| 98  | 4.289 | 4.02E-03 |  |  |  |  |  |  |  |  |  |  |  |
| 99  | 4.334 | 3.29E-06 |  |  |  |  |  |  |  |  |  |  |  |
| 100 | 4.337 | 3.00E-03 |  |  |  |  |  |  |  |  |  |  |  |
| 101 | 4.350 | 2.03E-03 |  |  |  |  |  |  |  |  |  |  |  |
| 102 | 4.383 | 2.14E-03 |  |  |  |  |  |  |  |  |  |  |  |
| 103 | 4.390 | 6.53E-03 |  |  |  |  |  |  |  |  |  |  |  |
| 104 | 4.420 | 2.11E-03 |  |  |  |  |  |  |  |  |  |  |  |
| 105 | 4.423 | 3.53E-03 |  |  |  |  |  |  |  |  |  |  |  |
| 106 | 4.439 | 4.29E-03 |  |  |  |  |  |  |  |  |  |  |  |
| 107 | 4.445 | 5.67E-04 |  |  |  |  |  |  |  |  |  |  |  |
| 108 | 4.459 | 2.08E-02 |  |  |  |  |  |  |  |  |  |  |  |
| 109 | 4.461 | 1.23E-03 |  |  |  |  |  |  |  |  |  |  |  |
| 110 | 4.469 | 4.44E-03 |  |  |  |  |  |  |  |  |  |  |  |



|    |       |          |        |       |        |        |        |        |        |       |        |       |        |
|----|-------|----------|--------|-------|--------|--------|--------|--------|--------|-------|--------|-------|--------|
| 39 | 3.739 | 6.00E-03 | 3.75%  | 0.00% | 15.24% | 74.62% | 0.18%  | 5.02%  | 0.07%  | 0.00% | 0.16%  | 0.01% | 0.95%  |
| 40 | 3.845 | 0.00E+00 | 0.11%  | 0.02% | 2.25%  | 0.22%  | 0.57%  | 0.57%  | 90.47% | 4.78% | 0.01%  | 0.01% | 1.00%  |
| 41 | 3.853 | 0.00E+00 | 0.03%  | 0.03% | 1.78%  | 0.05%  | 0.60%  | 0.08%  | 91.71% | 4.80% | 0.00%  | 0.02% | 0.91%  |
| 42 | 3.858 | 1.00E-03 | 46.61% | 0.00% | 4.69%  | 34.01% | 0.04%  | 3.31%  | 0.33%  | 0.02% | 0.98%  | 0.04% | 9.96%  |
| 43 | 3.894 | 2.00E-03 | 21.12% | 0.01% | 9.09%  | 55.48% | 2.91%  | 6.25%  | 0.73%  | 0.02% | 0.19%  | 0.05% | 4.15%  |
| 44 | 3.918 | 4.00E-02 | 4.52%  | 0.00% | 19.49% | 69.52% | 0.39%  | 4.60%  | 0.18%  | 0.00% | 0.14%  | 0.01% | 1.16%  |
| 45 | 3.950 | 3.00E-03 | 1.40%  | 0.01% | 20.56% | 66.39% | 3.76%  | 5.98%  | 0.97%  | 0.02% | 0.08%  | 0.05% | 0.78%  |
| 46 | 3.966 | 4.00E-03 | 32.33% | 0.01% | 6.71%  | 41.55% | 5.99%  | 4.85%  | 1.52%  | 0.03% | 0.27%  | 0.08% | 6.66%  |
| 47 | 3.992 | 9.00E-03 | 0.02%  | 0.21% | 3.88%  | 0.10%  | 51.91% | 2.31%  | 38.81% | 1.95% | 0.00%  | 0.32% | 0.49%  |
| 48 | 4.007 | 3.20E-02 | 0.66%  | 0.10% | 6.39%  | 0.69%  | 33.72% | 1.81%  | 52.41% | 2.13% | 0.01%  | 0.93% | 1.15%  |
| 49 | 4.023 | 5.00E-03 | 43.62% | 0.00% | 5.18%  | 33.59% | 0.93%  | 4.21%  | 0.93%  | 0.05% | 0.54%  | 0.04% | 10.92% |
| 50 | 4.037 | 2.70E-02 | 0.33%  | 0.20% | 6.45%  | 4.08%  | 29.36% | 2.63%  | 52.83% | 2.31% | 0.00%  | 0.76% | 1.04%  |
| 51 | 4.042 | 1.70E-02 | 1.27%  | 0.28% | 8.73%  | 25.54% | 30.70% | 4.08%  | 26.82% | 1.54% | 0.02%  | 0.19% | 0.84%  |
| 52 | 4.063 | 0.00E+00 | 1.58%  | 0.10% | 12.84% | 58.04% | 12.24% | 5.08%  | 8.86%  | 0.50% | 0.05%  | 0.09% | 0.61%  |
| 53 | 4.068 | 8.40E-02 | 4.21%  | 0.00% | 13.30% | 75.21% | 0.62%  | 5.34%  | 0.19%  | 0.01% | 0.05%  | 0.01% | 1.08%  |
| 54 | 4.087 | 8.60E-02 | 4.31%  | 0.02% | 19.26% | 54.15% | 9.26%  | 8.86%  | 2.26%  | 0.04% | 0.11%  | 0.15% | 1.60%  |
| 55 | 4.111 | 7.00E-03 | 2.07%  | 0.00% | 26.39% | 65.26% | 0.42%  | 4.69%  | 0.21%  | 0.01% | 0.06%  | 0.01% | 0.90%  |
| 56 | 4.160 | 4.00E-03 | 0.02%  | 0.09% | 1.43%  | 1.04%  | 73.97% | 3.90%  | 17.96% | 0.30% | 0.00%  | 1.12% | 0.17%  |
| 57 | 4.164 | 1.80E-02 | 5.74%  | 0.00% | 12.58% | 65.77% | 3.55%  | 9.76%  | 0.87%  | 0.03% | 0.12%  | 0.10% | 1.48%  |
| 58 | 4.171 | 1.86E-01 | 0.42%  | 0.03% | 41.62% | 32.61% | 14.67% | 5.24%  | 3.77%  | 0.07% | 0.01%  | 0.23% | 1.34%  |
| 59 | 4.172 | 7.70E-02 | 1.23%  | 0.01% | 36.22% | 46.24% | 4.31%  | 9.73%  | 1.01%  | 0.02% | 0.03%  | 0.06% | 1.14%  |
| 60 | 4.209 | 2.60E-02 | 0.36%  | 0.05% | 7.50%  | 26.46% | 46.26% | 5.76%  | 12.48% | 0.20% | 0.02%  | 0.67% | 0.23%  |
| 61 | 4.251 | 7.90E-02 | 0.68%  | 0.00% | 47.90% | 22.08% | 1.96%  | 24.74% | 0.48%  | 0.00% | 0.01%  | 0.01% | 2.13%  |
| 62 | 4.271 | 0.00E+00 | 0.02%  | 0.05% | 0.24%  | 0.39%  | 90.15% | 2.78%  | 5.09%  | 0.07% | 0.00%  | 1.14% | 0.08%  |
| 63 | 4.273 | 1.70E-02 | 0.02%  | 0.00% | 80.79% | 3.53%  | 0.17%  | 12.19% | 0.09%  | 0.00% | 0.01%  | 0.00% | 3.20%  |
| 64 | 4.294 | 1.20E-02 | 0.10%  | 0.00% | 34.66% | 1.49%  | 0.11%  | 56.46% | 0.05%  | 0.00% | 0.01%  | 0.00% | 7.13%  |
| 65 | 4.311 | 5.39E-01 | 0.54%  | 0.00% | 33.09% | 16.89% | 1.14%  | 43.17% | 0.43%  | 0.02% | 0.02%  | 0.03% | 4.67%  |
| 66 | 4.330 | 3.77E-01 | 0.47%  | 0.00% | 58.98% | 11.89% | 12.05% | 9.43%  | 3.06%  | 0.04% | 0.01%  | 0.13% | 3.95%  |
| 67 | 4.334 | 3.30E-02 | 0.03%  | 0.00% | 3.81%  | 0.82%  | 71.42% | 3.90%  | 17.40% | 0.45% | 0.01%  | 1.83% | 0.33%  |
| 68 | 4.341 | 6.39E-01 | 0.23%  | 0.00% | 25.70% | 10.76% | 26.01% | 26.98% | 6.39%  | 0.04% | 0.01%  | 0.15% | 3.74%  |
| 69 | 4.344 | 3.26E-01 | 0.14%  | 0.00% | 12.92% | 6.48%  | 52.53% | 13.28% | 12.63% | 0.08% | 0.01%  | 0.31% | 1.63%  |
| 70 | 4.370 | 4.00E-02 | 0.90%  | 0.01% | 1.99%  | 4.47%  | 66.75% | 6.11%  | 17.16% | 0.43% | 0.03%  | 1.70% | 0.45%  |
| 71 | 4.382 | 5.40E-02 | 0.80%  | 0.00% | 7.43%  | 8.94%  | 59.68% | 5.98%  | 16.16% | 0.07% | 0.03%  | 0.33% | 0.58%  |
| 72 | 4.401 | 7.00E-03 | 0.05%  | 0.33% | 0.97%  | 0.54%  | 9.80%  | 0.32%  | 82.27% | 4.46% | 0.04%  | 0.21% | 1.01%  |
| 73 | 4.435 | 0.00E+00 | 0.02%  | 0.10% | 0.13%  | 0.23%  | 90.06% | 2.80%  | 5.09%  | 0.08% | 0.00%  | 1.37% | 0.11%  |
| 74 | 4.481 | 2.30E-02 | 0.04%  | 0.00% | 2.47%  | 0.42%  | 0.02%  | 94.07% | 0.05%  | 0.00% | 0.01%  | 0.00% | 2.92%  |
| 75 | 4.492 | 2.00E-03 | 28.00% | 0.01% | 7.54%  | 36.18% | 1.61%  | 14.95% | 0.84%  | 0.05% | 1.94%  | 0.05% | 8.83%  |
| 76 | 4.512 | 6.00E-03 | 12.66% | 0.01% | 4.38%  | 16.35% | 0.34%  | 34.83% | 0.36%  | 0.03% | 16.47% | 0.03% | 14.54% |
| 77 | 4.526 | 4.00E-03 | 2.12%  | 0.01% | 4.71%  | 15.68% | 0.79%  | 52.14% | 0.63%  | 0.04% | 13.23% | 0.02% | 10.64% |
| 78 | 4.529 | 2.00E-03 | 43.23% | 0.00% | 4.91%  | 29.86% | 0.45%  | 3.98%  | 0.16%  | 0.03% | 4.20%  | 0.05% | 13.15% |
| 79 | 4.557 | 3.00E-03 | 12.55% | 0.01% | 5.36%  | 23.88% | 1.98%  | 3.63%  | 0.36%  | 0.04% | 30.22% | 0.07% | 21.92% |
| 80 | 4.609 | 2.00E-03 | 0.44%  | 0.00% | 0.56%  | 1.44%  | 86.83% | 2.88%  | 4.93%  | 0.13% | 0.20%  | 2.25% | 0.35%  |

Table S5: Energy (in Ev), oscillator strength and nature of the singlet states of 1-Co

| State | Energy | Oscillator | M <sub>0</sub> C | M <sub>1</sub> C | LC | M <sub>0</sub> LCT | M <sub>1</sub> LCT | LLCT | XLCT | XMCT | M <sub>0</sub> M <sub>1</sub> CT | M <sub>1</sub> M <sub>0</sub> CT | Other |
|-------|--------|------------|------------------|------------------|----|--------------------|--------------------|------|------|------|----------------------------------|----------------------------------|-------|
| 1     | 0.247  | 2.89E-09   |                  |                  |    |                    |                    |      |      |      |                                  |                                  |       |
| 2     | 0.268  | 6.43E-06   |                  |                  |    |                    |                    |      |      |      |                                  |                                  |       |
| 3     | 1.467  | 8.94E-06   |                  |                  |    |                    |                    |      |      |      |                                  |                                  |       |
| 4     | 1.476  | 8.58E-07   |                  |                  |    |                    |                    |      |      |      |                                  |                                  |       |
| 5     | 2.035  | 1.91E-05   |                  |                  |    |                    |                    |      |      |      |                                  |                                  |       |
| 6     | 2.115  | 4.95E-06   |                  |                  |    |                    |                    |      |      |      |                                  |                                  |       |
| 7     | 2.127  | 1.70E-03   |                  |                  |    |                    |                    |      |      |      |                                  |                                  |       |
| 8     | 2.211  | 4.09E-05   |                  |                  |    |                    |                    |      |      |      |                                  |                                  |       |
| 9     | 2.281  | 7.95E-04   |                  |                  |    |                    |                    |      |      |      |                                  |                                  |       |
| 10    | 2.380  | 1.52E-06   |                  |                  |    |                    |                    |      |      |      |                                  |                                  |       |
| 11    | 2.397  | 1.22E-05   |                  |                  |    |                    |                    |      |      |      |                                  |                                  |       |
| 12    | 2.478  | 8.51E-02   |                  |                  |    |                    |                    |      |      |      |                                  |                                  |       |
| 13    | 2.725  | 4.45E-05   |                  |                  |    |                    |                    |      |      |      |                                  |                                  |       |
| 14    | 2.729  | 2.77E-04   |                  |                  |    |                    |                    |      |      |      |                                  |                                  |       |
| 15    | 2.783  | 4.42E-03   |                  |                  |    |                    |                    |      |      |      |                                  |                                  |       |
| 16    | 2.796  | 2.13E-04   |                  |                  |    |                    |                    |      |      |      |                                  |                                  |       |
| 17    | 2.797  | 3.99E-04   |                  |                  |    |                    |                    |      |      |      |                                  |                                  |       |
| 18    | 2.801  | 4.05E-03   |                  |                  |    |                    |                    |      |      |      |                                  |                                  |       |
| 19    | 2.815  | 4.09E-03   |                  |                  |    |                    |                    |      |      |      |                                  |                                  |       |
| 20    | 2.848  | 5.24E-03   |                  |                  |    |                    |                    |      |      |      |                                  |                                  |       |
| 21    | 2.853  | 2.51E-03   |                  |                  |    |                    |                    |      |      |      |                                  |                                  |       |
| 22    | 2.867  | 2.06E-03   |                  |                  |    |                    |                    |      |      |      |                                  |                                  |       |
| 23    | 2.881  | 3.06E-03   |                  |                  |    |                    |                    |      |      |      |                                  |                                  |       |
| 24    | 2.891  | 1.09E-02   |                  |                  |    |                    |                    |      |      |      |                                  |                                  |       |
| 25    | 2.954  | 1.36E-03   |                  |                  |    |                    |                    |      |      |      |                                  |                                  |       |
| 26    | 2.961  | 1.08E-04   |                  |                  |    |                    |                    |      |      |      |                                  |                                  |       |
| 27    | 2.962  | 1.15E-03   |                  |                  |    |                    |                    |      |      |      |                                  |                                  |       |
| 28    | 2.977  | 2.07E-04   |                  |                  |    |                    |                    |      |      |      |                                  |                                  |       |
| 29    | 3.008  | 1.12E-02   |                  |                  |    |                    |                    |      |      |      |                                  |                                  |       |
| 30    | 3.048  | 3.46E-03   |                  |                  |    |                    |                    |      |      |      |                                  |                                  |       |
| 31    | 3.048  | 1.02E-02   |                  |                  |    |                    |                    |      |      |      |                                  |                                  |       |
| 32    | 3.066  | 2.99E-04   |                  |                  |    |                    |                    |      |      |      |                                  |                                  |       |
| 33    | 3.087  | 6.17E-05   |                  |                  |    |                    |                    |      |      |      |                                  |                                  |       |
| 34    | 3.107  | 5.09E-05   |                  |                  |    |                    |                    |      |      |      |                                  |                                  |       |
| 35    | 3.110  | 3.58E-05   |                  |                  |    |                    |                    |      |      |      |                                  |                                  |       |
| 36    | 3.145  | 1.82E-01   |                  |                  |    |                    |                    |      |      |      |                                  |                                  |       |
| 37    | 3.155  | 1.19E-01   |                  |                  |    |                    |                    |      |      |      |                                  |                                  |       |
| 38    | 3.179  | 1.16E-03   |                  |                  |    |                    |                    |      |      |      |                                  |                                  |       |
| 39    | 3.222  | 5.35E-04   |                  |                  |    |                    |                    |      |      |      |                                  |                                  |       |
| 40    | 3.277  | 7.59E-02   |                  |                  |    |                    |                    |      |      |      |                                  |                                  |       |
| 41    | 3.340  | 5.59E-02   |                  |                  |    |                    |                    |      |      |      |                                  |                                  |       |
| 42    | 3.354  | 4.71E-03   |                  |                  |    |                    |                    |      |      |      |                                  |                                  |       |
| 43    | 3.364  | 4.29E-03   |                  |                  |    |                    |                    |      |      |      |                                  |                                  |       |
| 44    | 3.375  | 1.74E-02   |                  |                  |    |                    |                    |      |      |      |                                  |                                  |       |
| 45    | 3.448  | 8.81E-06   |                  |                  |    |                    |                    |      |      |      |                                  |                                  |       |
| 46    | 3.490  | 2.64E-04   |                  |                  |    |                    |                    |      |      |      |                                  |                                  |       |

|     |       |          |  |  |  |  |  |  |  |  |  |  |  |  |
|-----|-------|----------|--|--|--|--|--|--|--|--|--|--|--|--|
| 47  | 3.506 | 5.93E-04 |  |  |  |  |  |  |  |  |  |  |  |  |
| 48  | 3.511 | 4.49E-05 |  |  |  |  |  |  |  |  |  |  |  |  |
| 49  | 3.524 | 3.44E-03 |  |  |  |  |  |  |  |  |  |  |  |  |
| 50  | 3.527 | 6.32E-03 |  |  |  |  |  |  |  |  |  |  |  |  |
| 51  | 3.529 | 9.43E-03 |  |  |  |  |  |  |  |  |  |  |  |  |
| 52  | 3.541 | 3.00E-05 |  |  |  |  |  |  |  |  |  |  |  |  |
| 53  | 3.552 | 5.85E-03 |  |  |  |  |  |  |  |  |  |  |  |  |
| 54  | 3.555 | 4.63E-03 |  |  |  |  |  |  |  |  |  |  |  |  |
| 55  | 3.556 | 2.66E-02 |  |  |  |  |  |  |  |  |  |  |  |  |
| 56  | 3.560 | 4.12E-02 |  |  |  |  |  |  |  |  |  |  |  |  |
| 57  | 3.580 | 2.16E-06 |  |  |  |  |  |  |  |  |  |  |  |  |
| 58  | 3.606 | 2.03E-03 |  |  |  |  |  |  |  |  |  |  |  |  |
| 59  | 3.679 | 3.31E-05 |  |  |  |  |  |  |  |  |  |  |  |  |
| 60  | 3.691 | 4.44E-03 |  |  |  |  |  |  |  |  |  |  |  |  |
| 61  | 3.698 | 9.70E-04 |  |  |  |  |  |  |  |  |  |  |  |  |
| 62  | 3.723 | 2.70E-04 |  |  |  |  |  |  |  |  |  |  |  |  |
| 63  | 3.729 | 1.41E-05 |  |  |  |  |  |  |  |  |  |  |  |  |
| 64  | 3.735 | 2.84E-04 |  |  |  |  |  |  |  |  |  |  |  |  |
| 65  | 3.737 | 7.71E-04 |  |  |  |  |  |  |  |  |  |  |  |  |
| 66  | 3.739 | 2.62E-04 |  |  |  |  |  |  |  |  |  |  |  |  |
| 67  | 3.741 | 3.26E-05 |  |  |  |  |  |  |  |  |  |  |  |  |
| 68  | 3.741 | 1.25E-06 |  |  |  |  |  |  |  |  |  |  |  |  |
| 69  | 3.758 | 1.08E-03 |  |  |  |  |  |  |  |  |  |  |  |  |
| 70  | 3.770 | 7.84E-05 |  |  |  |  |  |  |  |  |  |  |  |  |
| 71  | 3.774 | 2.28E-03 |  |  |  |  |  |  |  |  |  |  |  |  |
| 72  | 3.780 | 1.82E-04 |  |  |  |  |  |  |  |  |  |  |  |  |
| 73  | 3.812 | 1.01E-03 |  |  |  |  |  |  |  |  |  |  |  |  |
| 74  | 3.828 | 2.51E-04 |  |  |  |  |  |  |  |  |  |  |  |  |
| 75  | 3.831 | 6.04E-06 |  |  |  |  |  |  |  |  |  |  |  |  |
| 76  | 3.840 | 3.21E-05 |  |  |  |  |  |  |  |  |  |  |  |  |
| 77  | 3.853 | 9.27E-05 |  |  |  |  |  |  |  |  |  |  |  |  |
| 78  | 3.871 | 3.15E-03 |  |  |  |  |  |  |  |  |  |  |  |  |
| 79  | 3.908 | 3.30E-04 |  |  |  |  |  |  |  |  |  |  |  |  |
| 80  | 3.915 | 1.31E-04 |  |  |  |  |  |  |  |  |  |  |  |  |
| 81  | 3.918 | 6.97E-04 |  |  |  |  |  |  |  |  |  |  |  |  |
| 82  | 3.921 | 4.81E-05 |  |  |  |  |  |  |  |  |  |  |  |  |
| 83  | 3.936 | 7.37E-03 |  |  |  |  |  |  |  |  |  |  |  |  |
| 84  | 3.939 | 2.65E-02 |  |  |  |  |  |  |  |  |  |  |  |  |
| 85  | 3.942 | 4.87E-04 |  |  |  |  |  |  |  |  |  |  |  |  |
| 86  | 3.949 | 2.31E-02 |  |  |  |  |  |  |  |  |  |  |  |  |
| 87  | 3.960 | 1.08E-04 |  |  |  |  |  |  |  |  |  |  |  |  |
| 88  | 3.967 | 8.33E-05 |  |  |  |  |  |  |  |  |  |  |  |  |
| 89  | 3.968 | 1.88E-03 |  |  |  |  |  |  |  |  |  |  |  |  |
| 90  | 3.970 | 2.26E-04 |  |  |  |  |  |  |  |  |  |  |  |  |
| 91  | 3.988 | 6.89E-03 |  |  |  |  |  |  |  |  |  |  |  |  |
| 92  | 3.997 | 2.13E-05 |  |  |  |  |  |  |  |  |  |  |  |  |
| 93  | 4.000 | 1.63E-03 |  |  |  |  |  |  |  |  |  |  |  |  |
| 94  | 4.015 | 6.25E-04 |  |  |  |  |  |  |  |  |  |  |  |  |
| 95  | 4.038 | 1.06E-04 |  |  |  |  |  |  |  |  |  |  |  |  |
| 96  | 4.039 | 9.11E-03 |  |  |  |  |  |  |  |  |  |  |  |  |
| 97  | 4.073 | 2.56E-03 |  |  |  |  |  |  |  |  |  |  |  |  |
| 98  | 4.080 | 4.34E-03 |  |  |  |  |  |  |  |  |  |  |  |  |
| 99  | 4.081 | 1.05E-03 |  |  |  |  |  |  |  |  |  |  |  |  |
| 100 | 4.086 | 7.05E-04 |  |  |  |  |  |  |  |  |  |  |  |  |
| 101 | 4.105 | 3.28E-02 |  |  |  |  |  |  |  |  |  |  |  |  |
| 102 | 4.124 | 2.27E-03 |  |  |  |  |  |  |  |  |  |  |  |  |
| 103 | 4.128 | 9.31E-07 |  |  |  |  |  |  |  |  |  |  |  |  |
| 104 | 4.134 | 1.58E-03 |  |  |  |  |  |  |  |  |  |  |  |  |
| 105 | 4.143 | 8.49E-02 |  |  |  |  |  |  |  |  |  |  |  |  |
| 106 | 4.159 | 6.96E-04 |  |  |  |  |  |  |  |  |  |  |  |  |
| 107 | 4.168 | 3.31E-03 |  |  |  |  |  |  |  |  |  |  |  |  |
| 108 | 4.172 | 6.78E-07 |  |  |  |  |  |  |  |  |  |  |  |  |
| 109 | 4.183 | 3.16E-03 |  |  |  |  |  |  |  |  |  |  |  |  |
| 110 | 4.184 | 5.27E-03 |  |  |  |  |  |  |  |  |  |  |  |  |
| 111 | 4.190 | 9.43E-03 |  |  |  |  |  |  |  |  |  |  |  |  |
| 112 | 4.193 | 1.50E-03 |  |  |  |  |  |  |  |  |  |  |  |  |
| 113 | 4.203 | 1.17E-04 |  |  |  |  |  |  |  |  |  |  |  |  |
| 114 | 4.206 | 2.60E-02 |  |  |  |  |  |  |  |  |  |  |  |  |
| 115 | 4.225 | 6.95E-03 |  |  |  |  |  |  |  |  |  |  |  |  |
| 116 | 4.230 | 1.42E-02 |  |  |  |  |  |  |  |  |  |  |  |  |
| 117 | 4.236 | 3.68E-03 |  |  |  |  |  |  |  |  |  |  |  |  |
| 118 | 4.236 | 1.55E-03 |  |  |  |  |  |  |  |  |  |  |  |  |
| 119 | 4.237 | 7.09E-05 |  |  |  |  |  |  |  |  |  |  |  |  |
| 120 | 4.243 | 4.85E-03 |  |  |  |  |  |  |  |  |  |  |  |  |
| 121 | 4.267 | 3.20E-03 |  |  |  |  |  |  |  |  |  |  |  |  |
| 122 | 4.273 | 6.94E-05 |  |  |  |  |  |  |  |  |  |  |  |  |
| 123 | 4.276 | 3.33E-03 |  |  |  |  |  |  |  |  |  |  |  |  |
| 124 | 4.279 | 8.98E-05 |  |  |  |  |  |  |  |  |  |  |  |  |
| 125 | 4.282 | 5.23E-03 |  |  |  |  |  |  |  |  |  |  |  |  |
| 126 | 4.330 | 1.43E-04 |  |  |  |  |  |  |  |  |  |  |  |  |
| 127 | 4.337 | 1.88E-03 |  |  |  |  |  |  |  |  |  |  |  |  |
| 128 | 4.344 | 1.79E-03 |  |  |  |  |  |  |  |  |  |  |  |  |
| 129 | 4.371 | 1.46E-03 |  |  |  |  |  |  |  |  |  |  |  |  |
| 130 | 4.408 | 2.70E-04 |  |  |  |  |  |  |  |  |  |  |  |  |
| 131 | 4.414 | 6.63E-04 |  |  |  |  |  |  |  |  |  |  |  |  |
| 132 | 4.426 | 7.78E-03 |  |  |  |  |  |  |  |  |  |  |  |  |
| 133 | 4.431 | 5.28E-03 |  |  |  |  |  |  |  |  |  |  |  |  |
| 134 | 4.441 | 2.02E-03 |  |  |  |  |  |  |  |  |  |  |  |  |
| 135 | 4.445 | 4.01E-06 |  |  |  |  |  |  |  |  |  |  |  |  |
| 136 | 4.454 | 5.14E-04 |  |  |  |  |  |  |  |  |  |  |  |  |
| 137 | 4.457 | 6.79E-06 |  |  |  |  |  |  |  |  |  |  |  |  |
| 138 | 4.464 | 3.80E-03 |  |  |  |  |  |  |  |  |  |  |  |  |
| 139 | 4.466 | 1.09E-03 |  |  |  |  |  |  |  |  |  |  |  |  |
| 140 | 4.471 | 3.63E-02 |  |  |  |  |  |  |  |  |  |  |  |  |
| 141 | 4.478 | 1.89E-03 |  |  |  |  |  |  |  |  |  |  |  |  |
| 142 | 4.502 | 1.96E-02 |  |  |  |  |  |  |  |  |  |  |  |  |
| 143 | 4.522 | 2.85E-02 |  |  |  |  |  |  |  |  |  |  |  |  |



|     |       |          |  |  |  |  |  |  |  |  |  |  |  |
|-----|-------|----------|--|--|--|--|--|--|--|--|--|--|--|
| 144 | 4.533 | 1.53E-01 |  |  |  |  |  |  |  |  |  |  |  |
| 145 | 4.540 | 2.33E-04 |  |  |  |  |  |  |  |  |  |  |  |
| 146 | 4.545 | 6.87E-03 |  |  |  |  |  |  |  |  |  |  |  |
| 147 | 4.551 | 1.10E-01 |  |  |  |  |  |  |  |  |  |  |  |
| 148 | 4.556 | 2.08E-05 |  |  |  |  |  |  |  |  |  |  |  |
| 149 | 4.567 | 2.78E-03 |  |  |  |  |  |  |  |  |  |  |  |
| 150 | 4.571 | 6.56E-02 |  |  |  |  |  |  |  |  |  |  |  |
| 151 | 4.591 | 1.61E-02 |  |  |  |  |  |  |  |  |  |  |  |
| 152 | 4.598 | 6.20E-02 |  |  |  |  |  |  |  |  |  |  |  |
| 153 | 4.609 | 4.59E-05 |  |  |  |  |  |  |  |  |  |  |  |
| 154 | 4.615 | 9.01E-01 |  |  |  |  |  |  |  |  |  |  |  |
| 155 | 4.632 | 1.10E-04 |  |  |  |  |  |  |  |  |  |  |  |
| 156 | 4.659 | 1.28E-03 |  |  |  |  |  |  |  |  |  |  |  |
| 157 | 4.674 | 2.43E-03 |  |  |  |  |  |  |  |  |  |  |  |
| 158 | 4.678 | 2.79E-02 |  |  |  |  |  |  |  |  |  |  |  |
| 159 | 4.714 | 1.20E-03 |  |  |  |  |  |  |  |  |  |  |  |
| 160 | 4.731 | 7.74E-05 |  |  |  |  |  |  |  |  |  |  |  |

Table S6: Energy (in Ev), oscillator strength and nature of the singlet states of 1-Ni

| State | Energy | Oscillator | M <sub>av</sub> C | M <sub>vc</sub> C | LC | M <sub>av</sub> LCT | M <sub>vc</sub> LCT | LLCT | XLCT | XMCT | M <sub>av</sub> M <sub>vc</sub> CT | M <sub>vc</sub> M <sub>av</sub> CT | Other |
|-------|--------|------------|-------------------|-------------------|----|---------------------|---------------------|------|------|------|------------------------------------|------------------------------------|-------|
| 1     | 1.740  | 9.20E-09   |                   |                   |    |                     |                     |      |      |      |                                    |                                    |       |
| 2     | 1.768  | 1.50E-07   |                   |                   |    |                     |                     |      |      |      |                                    |                                    |       |
| 3     | 1.958  | 2.10E-05   |                   |                   |    |                     |                     |      |      |      |                                    |                                    |       |
| 4     | 2.035  | 1.44E-05   |                   |                   |    |                     |                     |      |      |      |                                    |                                    |       |
| 5     | 2.115  | 6.49E-06   |                   |                   |    |                     |                     |      |      |      |                                    |                                    |       |
| 6     | 2.123  | 1.75E-03   |                   |                   |    |                     |                     |      |      |      |                                    |                                    |       |
| 7     | 2.208  | 4.00E-05   |                   |                   |    |                     |                     |      |      |      |                                    |                                    |       |
| 8     | 2.279  | 8.72E-04   |                   |                   |    |                     |                     |      |      |      |                                    |                                    |       |
| 9     | 2.476  | 8.24E-02   |                   |                   |    |                     |                     |      |      |      |                                    |                                    |       |
| 10    | 2.521  | 2.82E-05   |                   |                   |    |                     |                     |      |      |      |                                    |                                    |       |
| 11    | 2.530  | 7.33E-05   |                   |                   |    |                     |                     |      |      |      |                                    |                                    |       |
| 12    | 2.564  | 3.43E-06   |                   |                   |    |                     |                     |      |      |      |                                    |                                    |       |
| 13    | 2.731  | 2.79E-04   |                   |                   |    |                     |                     |      |      |      |                                    |                                    |       |
| 14    | 2.732  | 8.82E-05   |                   |                   |    |                     |                     |      |      |      |                                    |                                    |       |
| 15    | 2.802  | 4.94E-03   |                   |                   |    |                     |                     |      |      |      |                                    |                                    |       |
| 16    | 2.802  | 4.31E-05   |                   |                   |    |                     |                     |      |      |      |                                    |                                    |       |
| 17    | 2.850  | 6.80E-03   |                   |                   |    |                     |                     |      |      |      |                                    |                                    |       |
| 18    | 2.857  | 9.92E-04   |                   |                   |    |                     |                     |      |      |      |                                    |                                    |       |
| 19    | 2.874  | 2.82E-03   |                   |                   |    |                     |                     |      |      |      |                                    |                                    |       |
| 20    | 2.885  | 2.80E-03   |                   |                   |    |                     |                     |      |      |      |                                    |                                    |       |
| 21    | 2.893  | 1.05E-02   |                   |                   |    |                     |                     |      |      |      |                                    |                                    |       |
| 22    | 2.953  | 1.22E-03   |                   |                   |    |                     |                     |      |      |      |                                    |                                    |       |
| 23    | 2.963  | 2.04E-03   |                   |                   |    |                     |                     |      |      |      |                                    |                                    |       |
| 24    | 2.978  | 4.86E-04   |                   |                   |    |                     |                     |      |      |      |                                    |                                    |       |
| 25    | 3.010  | 1.06E-02   |                   |                   |    |                     |                     |      |      |      |                                    |                                    |       |
| 26    | 3.026  | 5.86E-03   |                   |                   |    |                     |                     |      |      |      |                                    |                                    |       |
| 27    | 3.048  | 3.02E-03   |                   |                   |    |                     |                     |      |      |      |                                    |                                    |       |
| 28    | 3.051  | 9.79E-03   |                   |                   |    |                     |                     |      |      |      |                                    |                                    |       |
| 29    | 3.067  | 4.37E-04   |                   |                   |    |                     |                     |      |      |      |                                    |                                    |       |
| 30    | 3.110  | 3.71E-04   |                   |                   |    |                     |                     |      |      |      |                                    |                                    |       |
| 31    | 3.148  | 1.84E-01   |                   |                   |    |                     |                     |      |      |      |                                    |                                    |       |
| 32    | 3.155  | 1.15E-01   |                   |                   |    |                     |                     |      |      |      |                                    |                                    |       |
| 33    | 3.178  | 1.19E-03   |                   |                   |    |                     |                     |      |      |      |                                    |                                    |       |
| 34    | 3.221  | 9.98E-04   |                   |                   |    |                     |                     |      |      |      |                                    |                                    |       |
| 35    | 3.279  | 7.75E-02   |                   |                   |    |                     |                     |      |      |      |                                    |                                    |       |
| 36    | 3.338  | 5.55E-02   |                   |                   |    |                     |                     |      |      |      |                                    |                                    |       |
| 37    | 3.349  | 2.91E-03   |                   |                   |    |                     |                     |      |      |      |                                    |                                    |       |
| 38    | 3.363  | 4.48E-03   |                   |                   |    |                     |                     |      |      |      |                                    |                                    |       |
| 39    | 3.373  | 2.05E-02   |                   |                   |    |                     |                     |      |      |      |                                    |                                    |       |
| 40    | 3.395  | 7.92E-04   |                   |                   |    |                     |                     |      |      |      |                                    |                                    |       |
| 41    | 3.404  | 2.04E-04   |                   |                   |    |                     |                     |      |      |      |                                    |                                    |       |
| 42    | 3.442  | 1.55E-05   |                   |                   |    |                     |                     |      |      |      |                                    |                                    |       |
| 43    | 3.494  | 3.94E-04   |                   |                   |    |                     |                     |      |      |      |                                    |                                    |       |
| 44    | 3.496  | 6.65E-05   |                   |                   |    |                     |                     |      |      |      |                                    |                                    |       |
| 45    | 3.524  | 5.62E-03   |                   |                   |    |                     |                     |      |      |      |                                    |                                    |       |
| 46    | 3.534  | 4.22E-03   |                   |                   |    |                     |                     |      |      |      |                                    |                                    |       |
| 47    | 3.548  | 4.99E-03   |                   |                   |    |                     |                     |      |      |      |                                    |                                    |       |
| 48    | 3.558  | 6.43E-02   |                   |                   |    |                     |                     |      |      |      |                                    |                                    |       |
| 49    | 3.572  | 3.73E-06   |                   |                   |    |                     |                     |      |      |      |                                    |                                    |       |
| 50    | 3.587  | 8.46E-04   |                   |                   |    |                     |                     |      |      |      |                                    |                                    |       |
| 51    | 3.600  | 6.10E-03   |                   |                   |    |                     |                     |      |      |      |                                    |                                    |       |
| 52    | 3.608  | 1.33E-04   |                   |                   |    |                     |                     |      |      |      |                                    |                                    |       |
| 53    | 3.627  | 2.31E-03   |                   |                   |    |                     |                     |      |      |      |                                    |                                    |       |
| 54    | 3.669  | 4.11E-05   |                   |                   |    |                     |                     |      |      |      |                                    |                                    |       |
| 55    | 3.692  | 5.34E-03   |                   |                   |    |                     |                     |      |      |      |                                    |                                    |       |
| 56    | 3.702  | 2.97E-04   |                   |                   |    |                     |                     |      |      |      |                                    |                                    |       |
| 57    | 3.717  | 7.43E-04   |                   |                   |    |                     |                     |      |      |      |                                    |                                    |       |
| 58    | 3.743  | 2.74E-05   |                   |                   |    |                     |                     |      |      |      |                                    |                                    |       |
| 59    | 3.745  | 1.52E-04   |                   |                   |    |                     |                     |      |      |      |                                    |                                    |       |
| 60    | 3.758  | 5.25E-05   |                   |                   |    |                     |                     |      |      |      |                                    |                                    |       |
| 61    | 3.761  | 1.70E-03   |                   |                   |    |                     |                     |      |      |      |                                    |                                    |       |
| 62    | 3.765  | 1.43E-04   |                   |                   |    |                     |                     |      |      |      |                                    |                                    |       |
| 63    | 3.766  | 2.72E-03   |                   |                   |    |                     |                     |      |      |      |                                    |                                    |       |
| 64    | 3.785  | 3.27E-04   |                   |                   |    |                     |                     |      |      |      |                                    |                                    |       |
| 65    | 3.796  | 9.58E-05   |                   |                   |    |                     |                     |      |      |      |                                    |                                    |       |
| 66    | 3.814  | 1.06E-03   |                   |                   |    |                     |                     |      |      |      |                                    |                                    |       |
| 67    | 3.839  | 2.25E-04   |                   |                   |    |                     |                     |      |      |      |                                    |                                    |       |
| 68    | 3.872  | 3.01E-03   |                   |                   |    |                     |                     |      |      |      |                                    |                                    |       |
| 69    | 3.882  | 2.63E-07   |                   |                   |    |                     |                     |      |      |      |                                    |                                    |       |
| 70    | 3.917  | 4.21E-04   |                   |                   |    |                     |                     |      |      |      |                                    |                                    |       |
| 71    | 3.922  | 1.43E-04   |                   |                   |    |                     |                     |      |      |      |                                    |                                    |       |

|     |       |          |  |  |  |  |  |  |  |  |  |  |  |
|-----|-------|----------|--|--|--|--|--|--|--|--|--|--|--|
| 72  | 3.940 | 2.71E-02 |  |  |  |  |  |  |  |  |  |  |  |
| 73  | 3.949 | 2.28E-02 |  |  |  |  |  |  |  |  |  |  |  |
| 74  | 3.960 | 1.67E-05 |  |  |  |  |  |  |  |  |  |  |  |
| 75  | 3.966 | 6.36E-05 |  |  |  |  |  |  |  |  |  |  |  |
| 76  | 3.968 | 1.24E-03 |  |  |  |  |  |  |  |  |  |  |  |
| 77  | 3.986 | 6.14E-03 |  |  |  |  |  |  |  |  |  |  |  |
| 78  | 3.996 | 2.82E-04 |  |  |  |  |  |  |  |  |  |  |  |
| 79  | 4.001 | 2.20E-03 |  |  |  |  |  |  |  |  |  |  |  |
| 80  | 4.043 | 2.58E-05 |  |  |  |  |  |  |  |  |  |  |  |
| 81  | 4.057 | 5.77E-04 |  |  |  |  |  |  |  |  |  |  |  |
| 82  | 4.075 | 2.75E-03 |  |  |  |  |  |  |  |  |  |  |  |
| 83  | 4.085 | 2.07E-03 |  |  |  |  |  |  |  |  |  |  |  |
| 84  | 4.103 | 2.73E-02 |  |  |  |  |  |  |  |  |  |  |  |
| 85  | 4.114 | 8.15E-04 |  |  |  |  |  |  |  |  |  |  |  |
| 86  | 4.117 | 5.05E-05 |  |  |  |  |  |  |  |  |  |  |  |
| 87  | 4.124 | 5.61E-03 |  |  |  |  |  |  |  |  |  |  |  |
| 88  | 4.133 | 9.45E-04 |  |  |  |  |  |  |  |  |  |  |  |
| 89  | 4.138 | 7.31E-05 |  |  |  |  |  |  |  |  |  |  |  |
| 90  | 4.142 | 9.72E-02 |  |  |  |  |  |  |  |  |  |  |  |
| 91  | 4.147 | 5.08E-03 |  |  |  |  |  |  |  |  |  |  |  |
| 92  | 4.158 | 1.20E-03 |  |  |  |  |  |  |  |  |  |  |  |
| 93  | 4.169 | 3.22E-03 |  |  |  |  |  |  |  |  |  |  |  |
| 94  | 4.172 | 5.41E-03 |  |  |  |  |  |  |  |  |  |  |  |
| 95  | 4.182 | 3.60E-03 |  |  |  |  |  |  |  |  |  |  |  |
| 96  | 4.184 | 4.69E-03 |  |  |  |  |  |  |  |  |  |  |  |
| 97  | 4.191 | 1.36E-03 |  |  |  |  |  |  |  |  |  |  |  |
| 98  | 4.202 | 2.15E-05 |  |  |  |  |  |  |  |  |  |  |  |
| 99  | 4.206 | 1.76E-02 |  |  |  |  |  |  |  |  |  |  |  |
| 100 | 4.214 | 1.49E-05 |  |  |  |  |  |  |  |  |  |  |  |
| 101 | 4.222 | 1.16E-02 |  |  |  |  |  |  |  |  |  |  |  |
| 102 | 4.225 | 6.41E-03 |  |  |  |  |  |  |  |  |  |  |  |
| 103 | 4.237 | 3.77E-03 |  |  |  |  |  |  |  |  |  |  |  |
| 104 | 4.276 | 1.53E-04 |  |  |  |  |  |  |  |  |  |  |  |
| 105 | 4.279 | 4.75E-03 |  |  |  |  |  |  |  |  |  |  |  |
| 106 | 4.281 | 1.45E-05 |  |  |  |  |  |  |  |  |  |  |  |
| 107 | 4.285 | 4.86E-03 |  |  |  |  |  |  |  |  |  |  |  |
| 108 | 4.295 | 1.23E-04 |  |  |  |  |  |  |  |  |  |  |  |
| 109 | 4.315 | 1.64E-03 |  |  |  |  |  |  |  |  |  |  |  |
| 110 | 4.332 | 2.51E-03 |  |  |  |  |  |  |  |  |  |  |  |
| 111 | 4.337 | 5.80E-05 |  |  |  |  |  |  |  |  |  |  |  |
| 112 | 4.342 | 2.39E-04 |  |  |  |  |  |  |  |  |  |  |  |
| 113 | 4.344 | 3.84E-03 |  |  |  |  |  |  |  |  |  |  |  |
| 114 | 4.349 | 1.09E-03 |  |  |  |  |  |  |  |  |  |  |  |
| 115 | 4.367 | 3.03E-04 |  |  |  |  |  |  |  |  |  |  |  |
| 116 | 4.370 | 1.14E-04 |  |  |  |  |  |  |  |  |  |  |  |
| 117 | 4.374 | 2.24E-03 |  |  |  |  |  |  |  |  |  |  |  |
| 118 | 4.379 | 2.08E-02 |  |  |  |  |  |  |  |  |  |  |  |
| 119 | 4.407 | 1.30E-03 |  |  |  |  |  |  |  |  |  |  |  |
| 120 | 4.426 | 4.60E-03 |  |  |  |  |  |  |  |  |  |  |  |
| 121 | 4.431 | 6.25E-03 |  |  |  |  |  |  |  |  |  |  |  |
| 122 | 4.442 | 7.66E-04 |  |  |  |  |  |  |  |  |  |  |  |
| 123 | 4.446 | 1.39E-05 |  |  |  |  |  |  |  |  |  |  |  |
| 124 | 4.459 | 5.22E-03 |  |  |  |  |  |  |  |  |  |  |  |
| 125 | 4.460 | 1.68E-04 |  |  |  |  |  |  |  |  |  |  |  |
| 126 | 4.464 | 6.01E-03 |  |  |  |  |  |  |  |  |  |  |  |
| 127 | 4.466 | 1.93E-03 |  |  |  |  |  |  |  |  |  |  |  |
| 128 | 4.468 | 6.59E-06 |  |  |  |  |  |  |  |  |  |  |  |
| 129 | 4.470 | 3.38E-02 |  |  |  |  |  |  |  |  |  |  |  |
| 130 | 4.501 | 5.97E-04 |  |  |  |  |  |  |  |  |  |  |  |
| 131 | 4.503 | 8.08E-03 |  |  |  |  |  |  |  |  |  |  |  |
| 132 | 4.504 | 1.05E-02 |  |  |  |  |  |  |  |  |  |  |  |
| 133 | 4.517 | 6.44E-04 |  |  |  |  |  |  |  |  |  |  |  |
| 134 | 4.521 | 6.58E-03 |  |  |  |  |  |  |  |  |  |  |  |
| 135 | 4.525 | 6.63E-03 |  |  |  |  |  |  |  |  |  |  |  |
| 136 | 4.531 | 1.62E-01 |  |  |  |  |  |  |  |  |  |  |  |
| 137 | 4.536 | 5.75E-02 |  |  |  |  |  |  |  |  |  |  |  |
| 138 | 4.542 | 7.86E-04 |  |  |  |  |  |  |  |  |  |  |  |
| 139 | 4.549 | 8.79E-02 |  |  |  |  |  |  |  |  |  |  |  |
| 140 | 4.557 | 9.23E-04 |  |  |  |  |  |  |  |  |  |  |  |
| 141 | 4.559 | 1.50E-03 |  |  |  |  |  |  |  |  |  |  |  |
| 142 | 4.570 | 9.76E-02 |  |  |  |  |  |  |  |  |  |  |  |
| 143 | 4.590 | 2.69E-02 |  |  |  |  |  |  |  |  |  |  |  |
| 144 | 4.613 | 9.57E-01 |  |  |  |  |  |  |  |  |  |  |  |
| 145 | 4.615 | 4.46E-05 |  |  |  |  |  |  |  |  |  |  |  |
| 146 | 4.651 | 3.68E-03 |  |  |  |  |  |  |  |  |  |  |  |
| 147 | 4.653 | 1.29E-02 |  |  |  |  |  |  |  |  |  |  |  |
| 148 | 4.656 | 2.00E-03 |  |  |  |  |  |  |  |  |  |  |  |
| 149 | 4.661 | 3.31E-04 |  |  |  |  |  |  |  |  |  |  |  |
| 150 | 4.687 | 2.48E-05 |  |  |  |  |  |  |  |  |  |  |  |
| 151 | 4.690 | 7.33E-05 |  |  |  |  |  |  |  |  |  |  |  |
| 152 | 4.697 | 4.23E-03 |  |  |  |  |  |  |  |  |  |  |  |
| 153 | 4.698 | 2.46E-03 |  |  |  |  |  |  |  |  |  |  |  |
| 154 | 4.704 | 1.43E-05 |  |  |  |  |  |  |  |  |  |  |  |
| 155 | 4.713 | 1.31E-02 |  |  |  |  |  |  |  |  |  |  |  |
| 156 | 4.713 | 5.05E-04 |  |  |  |  |  |  |  |  |  |  |  |
| 157 | 4.734 | 1.89E-03 |  |  |  |  |  |  |  |  |  |  |  |
| 158 | 4.746 | 8.93E-05 |  |  |  |  |  |  |  |  |  |  |  |
| 159 | 4.750 | 1.20E-03 |  |  |  |  |  |  |  |  |  |  |  |
| 160 | 4.762 | 1.93E-03 |  |  |  |  |  |  |  |  |  |  |  |

Table S7: Energy (in Ev), oscillator strength and nature of the singlet states of 1-Zn

| State | Energy | Oscillator | M <sub>0</sub> C | M <sub>1</sub> C | LC     | M <sub>0</sub> LCT | M <sub>1</sub> LCT | LLCT   | XLCT   | XMCT  | M <sub>0</sub> M <sub>1</sub> CT | M <sub>0</sub> M <sub>0</sub> CT | Other  |
|-------|--------|------------|------------------|------------------|--------|--------------------|--------------------|--------|--------|-------|----------------------------------|----------------------------------|--------|
| 1     | 2.043  | 0.00E+00   | 3.17%            | 0.00%            | 5.20%  | 77.82%             | 0.02%              | 12.38% | 0.03%  | 0.00% | 0.29%                            | 0.00%                            | 1.09%  |
| 2     | 2.190  | 1.00E-03   | 2.75%            | 0.00%            | 4.49%  | 71.90%             | 0.02%              | 19.19% | 0.04%  | 0.00% | 0.28%                            | 0.00%                            | 1.32%  |
| 3     | 2.409  | 1.01E-01   | 1.39%            | 0.00%            | 11.66% | 71.48%             | 0.02%              | 13.68% | 0.06%  | 0.01% | 0.49%                            | 0.00%                            | 1.22%  |
| 4     | 2.782  | 2.40E-02   | 2.66%            | 0.00%            | 5.29%  | 76.02%             | 0.03%              | 13.74% | 0.04%  | 0.00% | 0.88%                            | 0.00%                            | 1.34%  |
| 5     | 2.905  | 4.00E-03   | 1.99%            | 0.00%            | 13.15% | 78.73%             | 0.02%              | 5.60%  | 0.02%  | 0.00% | 0.02%                            | 0.00%                            | 0.47%  |
| 6     | 2.918  | 9.00E-03   | 2.40%            | 0.00%            | 5.10%  | 70.09%             | 0.02%              | 20.01% | 0.03%  | 0.00% | 0.79%                            | 0.00%                            | 1.58%  |
| 7     | 2.939  | 0.00E+00   | 4.83%            | 0.00%            | 11.86% | 76.05%             | 0.02%              | 6.07%  | 0.02%  | 0.00% | 0.02%                            | 0.00%                            | 1.13%  |
| 8     | 3.023  | 2.80E-02   | 1.19%            | 0.00%            | 9.65%  | 74.57%             | 0.01%              | 13.43% | 0.03%  | 0.00% | 0.39%                            | 0.00%                            | 0.72%  |
| 9     | 3.058  | 9.00E-02   | 2.02%            | 0.00%            | 20.34% | 71.28%             | 0.02%              | 5.59%  | 0.03%  | 0.00% | 0.01%                            | 0.00%                            | 0.72%  |
| 10    | 3.087  | 1.02E-01   | 0.80%            | 0.00%            | 9.38%  | 74.78%             | 0.02%              | 14.53% | 0.04%  | 0.00% | 0.11%                            | 0.00%                            | 0.33%  |
| 11    | 3.123  | 4.00E-02   | 4.04%            | 0.00%            | 13.41% | 69.17%             | 0.02%              | 11.74% | 0.04%  | 0.00% | 0.11%                            | 0.00%                            | 1.47%  |
| 12    | 3.169  | 1.92E-01   | 4.10%            | 0.00%            | 14.61% | 69.99%             | 0.01%              | 10.42% | 0.03%  | 0.00% | 0.01%                            | 0.00%                            | 1.42%  |
| 13    | 3.205  | 1.66E-01   | 1.09%            | 0.00%            | 9.25%  | 72.60%             | 0.02%              | 16.50% | 0.03%  | 0.00% | 0.09%                            | 0.00%                            | 0.43%  |
| 14    | 3.246  | 8.20E-02   | 0.84%            | 0.00%            | 12.16% | 72.85%             | 0.01%              | 13.69% | 0.01%  | 0.00% | 0.09%                            | 0.00%                            | 0.36%  |
| 15    | 3.368  | 1.00E-03   | 0.02%            | 0.00%            | 1.60%  | 0.85%              | 0.00%              | 93.74% | 0.01%  | 0.00% | 0.00%                            | 0.00%                            | 3.78%  |
| 16    | 3.421  | 3.00E-03   | 0.02%            | 0.00%            | 1.56%  | 0.86%              | 0.00%              | 93.77% | 0.01%  | 0.00% | 0.01%                            | 0.00%                            | 3.78%  |
| 17    | 3.580  | 5.00E-02   | 1.97%            | 0.00%            | 16.20% | 68.22%             | 0.02%              | 12.12% | 0.07%  | 0.00% | 0.10%                            | 0.00%                            | 1.31%  |
| 18    | 3.806  | 3.00E-03   | 4.15%            | 0.00%            | 15.88% | 73.45%             | 0.02%              | 5.37%  | 0.03%  | 0.00% | 0.06%                            | 0.00%                            | 1.05%  |
| 19    | 3.914  | 4.00E-03   | 43.17%           | 0.00%            | 6.00%  | 37.04%             | 0.01%              | 3.81%  | 0.02%  | 0.01% | 0.22%                            | 0.02%                            | 9.71%  |
| 20    | 3.950  | 1.00E-03   | 48.02%           | 0.00%            | 5.12%  | 33.66%             | 0.00%              | 3.21%  | 0.01%  | 0.00% | 0.11%                            | 0.00%                            | 9.86%  |
| 21    | 3.974  | 3.80E-02   | 7.27%            | 0.00%            | 20.26% | 65.89%             | 0.02%              | 4.57%  | 0.03%  | 0.00% | 0.06%                            | 0.00%                            | 1.88%  |
| 22    | 4.007  | 0.00E+00   | 0.00%            | 0.02%            | 0.08%  | 0.03%              | 2.69%              | 0.04%  | 93.63% | 2.94% | 0.00%                            | 0.07%                            | 0.50%  |
| 23    | 4.015  | 3.00E-03   | 1.39%            | 0.00%            | 25.07% | 44.29%             | 0.02%              | 27.81% | 0.09%  | 0.00% | 0.03%                            | 0.00%                            | 1.30%  |
| 24    | 4.018  | 3.00E-03   | 5.26%            | 0.00%            | 14.69% | 66.85%             | 0.02%              | 11.56% | 0.19%  | 0.01% | 0.05%                            | 0.00%                            | 1.39%  |
| 25    | 4.045  | 1.00E-03   | 0.55%            | 0.00%            | 6.81%  | 27.36%             | 0.01%              | 61.47% | 0.09%  | 0.00% | 0.01%                            | 0.00%                            | 3.71%  |
| 26    | 4.060  | 8.00E-03   | 48.83%           | 0.00%            | 4.68%  | 27.00%             | 0.05%              | 6.14%  | 0.70%  | 0.03% | 0.13%                            | 0.00%                            | 12.45% |
| 27    | 4.079  | 4.00E-03   | 1.37%            | 0.03%            | 7.83%  | 1.40%              | 4.15%              | 12.92% | 68.54% | 2.15% | 0.01%                            | 0.10%                            | 1.51%  |
| 28    | 4.081  | 4.70E-02   | 1.02%            | 0.01%            | 9.92%  | 2.99%              | 0.83%              | 67.77% | 13.72% | 0.44% | 0.01%                            | 0.02%                            | 3.29%  |
| 29    | 4.110  | 0.00E+00   | 0.00%            | 0.01%            | 0.30%  | 0.03%              | 1.93%              | 0.04%  | 94.24% | 2.92% | 0.00%                            | 0.05%                            | 0.48%  |
| 30    | 4.121  | 1.00E-02   | 2.71%            | 0.00%            | 15.41% | 74.40%             | 0.02%              | 6.46%  | 0.16%  | 0.01% | 0.02%                            | 0.00%                            | 0.82%  |
| 31    | 4.151  | 6.60E-02   | 0.71%            | 0.00%            | 16.09% | 75.72%             | 0.02%              | 7.03%  | 0.08%  | 0.00% | 0.01%                            | 0.00%                            | 0.34%  |
| 32    | 4.160  | 1.70E-02   | 0.52%            | 0.01%            | 25.85% | 33.16%             | 1.47%              | 3.92%  | 32.82% | 1.03% | 0.02%                            | 0.04%                            | 1.16%  |
| 33    | 4.163  | 1.00E-02   | 0.33%            | 0.01%            | 21.63% | 22.98%             | 2.06%              | 3.17%  | 47.23% | 1.48% | 0.01%                            | 0.05%                            | 1.06%  |
| 34    | 4.180  | 1.48E-01   | 0.88%            | 0.00%            | 35.56% | 48.57%             | 0.01%              | 12.34% | 0.21%  | 0.01% | 0.02%                            | 0.00%                            | 2.39%  |
| 35    | 4.227  | 1.66E-01   | 0.93%            | 0.00%            | 55.63% | 34.27%             | 0.01%              | 7.03%  | 0.03%  | 0.00% | 0.02%                            | 0.00%                            | 2.09%  |
| 36    | 4.240  | 3.03E-01   | 1.13%            | 0.00%            | 38.80% | 51.41%             | 0.02%              | 7.28%  | 0.03%  | 0.00% | 0.02%                            | 0.00%                            | 1.32%  |
| 37    | 4.258  | 4.00E-03   | 3.89%            | 0.00%            | 16.70% | 66.87%             | 0.01%              | 11.17% | 0.04%  | 0.00% | 0.01%                            | 0.00%                            | 1.31%  |
| 38    | 4.272  | 2.60E-02   | 0.24%            | 0.00%            | 82.21% | 8.98%              | 0.00%              | 4.40%  | 0.01%  | 0.00% | 0.00%                            | 0.00%                            | 4.16%  |
| 39    | 4.280  | 6.00E-03   | 1.18%            | 0.00%            | 61.32% | 29.72%             | 0.01%              | 4.64%  | 0.02%  | 0.00% | 0.01%                            | 0.00%                            | 3.10%  |
| 40    | 4.305  | 4.00E-03   | 0.04%            | 0.00%            | 3.64%  | 2.04%              | 0.00%              | 92.99% | 0.00%  | 0.00% | 0.00%                            | 0.00%                            | 1.28%  |
| 41    | 4.350  | 2.00E-01   | 0.60%            | 0.00%            | 19.55% | 13.16%             | 0.01%              | 64.02% | 0.02%  | 0.00% | 0.00%                            | 0.00%                            | 2.64%  |
| 42    | 4.357  | 1.37E+00   | 1.22%            | 0.00%            | 47.09% | 44.54%             | 0.01%              | 5.18%  | 0.02%  | 0.00% | 0.01%                            | 0.00%                            | 1.94%  |
| 43    | 4.365  | 2.46E-01   | 0.73%            | 0.00%            | 40.83% | 20.37%             | 0.01%              | 36.19% | 0.03%  | 0.00% | 0.00%                            | 0.00%                            | 1.85%  |
| 44    | 4.530  | 4.20E-02   | 6.79%            | 0.00%            | 13.85% | 64.89%             | 0.07%              | 10.98% | 0.36%  | 0.02% | 0.15%                            | 0.01%                            | 2.90%  |
| 45    | 4.554  | 3.00E-03   | 46.73%           | 0.00%            | 5.41%  | 31.62%             | 0.01%              | 4.06%  | 0.04%  | 0.01% | 0.21%                            | 0.01%                            | 11.91% |
| 46    | 4.561  | 3.00E-03   | 46.44%           | 0.00%            | 5.48%  | 31.50%             | 0.01%              | 4.09%  | 0.03%  | 0.01% | 0.22%                            | 0.01%                            | 12.21% |
| 47    | 4.641  | 7.95E-01   | 0.05%            | 0.02%            | 77.83% | 0.50%              | 0.10%              | 17.54% | 0.12%  | 0.02% | 0.00%                            | 0.00%                            | 3.82%  |
| 48    | 4.674  | 2.00E-03   | 41.81%           | 0.00%            | 7.24%  | 31.16%             | 0.04%              | 6.69%  | 0.26%  | 0.01% | 0.14%                            | 0.01%                            | 12.64% |
| 49    | 4.707  | 0.00E+00   | 0.00%            | 0.03%            | 0.06%  | 0.00%              | 2.64%              | 0.01%  | 92.02% | 4.75% | 0.00%                            | 0.11%                            | 0.39%  |
| 50    | 4.746  | 3.00E-03   | 0.09%            | 0.00%            | 2.60%  | 4.28%              | 0.20%              | 87.77% | 1.41%  | 0.04% | 0.01%                            | 0.01%                            | 3.59%  |
| 51    | 4.786  | 4.00E-03   | 0.02%            | 0.04%            | 6.06%  | 0.14%              | 4.57%              | 0.60%  | 83.63% | 4.09% | 0.00%                            | 0.19%                            | 0.68%  |
| 52    | 4.796  | 4.00E-03   | 1.79%            | 0.01%            | 6.38%  | 28.84%             | 1.70%              | 46.51% | 11.82% | 0.36% | 0.06%                            | 0.05%                            | 2.49%  |
| 53    | 4.810  | 3.00E-03   | 0.01%            | 0.02%            | 0.65%  | 0.19%              | 1.87%              | 0.42%  | 91.85% | 4.54% | 0.00%                            | 0.07%                            | 0.38%  |
| 54    | 4.817  | 1.09E-01   | 0.05%            | 0.00%            | 10.08% | 1.17%              | 0.10%              | 83.99% | 0.98%  | 0.05% | 0.01%                            | 0.00%                            | 3.58%  |
| 55    | 4.821  | 1.90E-02   | 0.78%            | 0.03%            | 6.62%  | 31.11%             | 5.90%              | 13.48% | 39.52% | 1.29% | 0.07%                            | 0.16%                            | 1.04%  |
| 56    | 4.854  | 3.50E-02   | 1.05%            | 0.02%            | 4.42%  | 25.48%             | 3.60%              | 39.36% | 23.43% | 0.73% | 0.03%                            | 0.09%                            | 1.80%  |
| 57    | 4.869  | 0.00E+00   | 0.01%            | 0.03%            | 8.95%  | 0.55%              | 3.41%              | 1.84%  | 80.31% | 3.91% | 0.01%                            | 0.14%                            | 0.84%  |
| 58    | 4.886  | 1.01E-01   | 0.89%            | 0.00%            | 20.04% | 62.70%             | 0.06%              | 14.56% | 0.49%  | 0.03% | 0.07%                            | 0.00%                            | 1.16%  |
| 59    | 4.924  | 1.30E-02   | 1.44%            | 0.00%            | 8.37%  | 52.90%             | 0.67%              | 30.38% | 4.24%  | 0.13% | 0.07%                            | 0.02%                            | 1.79%  |
| 60    | 4.925  | 6.80E-02   | 0.25%            | 0.00%            | 10.93% | 9.89%              | 0.10%              | 75.00% | 0.51%  | 0.02% | 0.03%                            | 0.00%                            | 3.28%  |
| 61    | 4.950  | 0.00E+00   | 0.00%            | 0.00%            | 0.07%  | 0.00%              | 2.63%              | 0.02%  | 95.77% | 1.46% | 0.00%                            | 0.04%                            | 0.01%  |
| 62    | 4.995  | 2.00E-03   | 0.08%            | 0.01%            | 8.30%  | 1.66%              | 0.85%              | 81.75% | 3.79%  | 0.15% | 0.01%                            | 0.02%                            | 3.39%  |
| 63    | 5.031  | 0.00E+00   | 0.00%            | 0.01%            | 6.04%  | 0.11%              | 4.68%              | 0.39%  | 87.19% | 1.41% | 0.00%                            | 0.07%                            | 0.12%  |
| 64    | 5.051  | 0.00E+00   | 0.00%            | 0.00%            | 1.20%  | 0.03%              | 1.96%              | 0.07%  | 95.25% | 1.45% | 0.00%                            | 0.03%                            | 0.02%  |
| 65    | 5.055  | 4.30E-02   | 0.05%            | 0.00%            | 93.08% | 1.76%              | 0.06%              | 2.90%  | 1.25%  | 0.03% | 0.01%                            | 0.00%                            | 0.86%  |
| 66    | 5.092  | 4.90E-02   | 0.03%            | 0.00%            | 92.83% | 2.62%              | 0.04%              | 3.11%  | 0.29%  | 0.01% | 0.00%                            | 0.00%                            | 1.08%  |
| 67    | 5.110  | 0.00E+00   | 0.01%            | 0.01%            | 11.34% | 0.24%              | 3.72%              | 1.28%  | 81.88% | 1.25% | 0.00%                            | 0.05%                            | 0.23%  |
| 68    | 5.127  | 0.00E+00   | 0.00%            | 0.00%            | 0.16%  | 0.01%              | 2.66%              | 0.23%  | 94.45% | 2.41% | 0.00%                            | 0.07%                            | 0.02%  |
| 69    | 5.129  | 3.00E-03   | 0.05%            | 0.05%            | 23.26% | 1.79%              | 8.95%              | 21.17% | 41.32% | 1.32% | 0.01%                            | 0.23%                            | 1.85%  |
| 70    | 5.142  | 1.00E-03   | 0.22%            | 0.00%            | 8.39%  | 5.68%              | 0.73%              | 79.23% | 2.39%  | 0.08% | 0.03%                            | 0.02%                            | 3.24%  |
| 71    | 5.189  | 2.00E-03   | 0.17%            | 0.01%            | 72.32% | 7.29%              | 0.24%              | 15.01% | 0.82%  | 0.03% | 0.10%                            | 0.01%                            | 4.01%  |
| 72    | 5.198  | 1.00E-03   | 0.00%            | 0.00%            | 2.21%  | 0.19%              | 2.89%              | 1.47%  | 88.92% | 4.12% | 0.00%                            | 0.12%                            | 0.06%  |
| 73    | 5.216  | 5.90E-02   | 0.06%            | 0.00%            | 76.95% | 6.59%              | 0.45%              | 4.84%  | 9.66%  | 0.39% | 0.00%                            | 0.02%                            | 1.04%  |
| 74    | 5.231  | 0.00E+00   | 0.00%            | 0.00%            | 0.80%  | 0.07%              | 1.94%              | 0.82%  | 93.89% | 2.40% | 0.00%                            | 0.05%                            | 0.03%  |
| 75    | 5.237  | 8.00E-03   | 0.01%            | 0.00%            | 7.60%  | 0.50%              | 3.93%              | 4.58%  | 80.64% | 2.42% | 0.00%                            | 0.10%                            | 0.20%  |
| 76    | 5.251  | 4.50E-02   | 0.03%            | 0.00%            | 91.47% | 2.02%              | 0.10%              | 2.71%  | 1.40%  | 0.04% | 0.00%                            | 0.00%                            | 2.23%  |
| 77    | 5.287  | 2.00E-03   | 0.17%            | 0.00%            | 38.12% | 4.81%              | 1.56%              | 10.99% | 41.35% | 1.48% | 0.09%                            | 0.06%                            | 1.39%  |
| 78    | 5.303  | 3.00E-03   | 0.12%            | 0.00%            | 15.20% | 3.23%              | 1.77%              | 19.89% | 55.80% | 2.67% | 0.04%                            | 0.08%                            | 1.20%  |
| 79    | 5.306  | 2.00E-03   | 0.05%            | 0.00%            | 2.71%  | 1.54%              | 3.82%              | 19.52% | 67.80% | 3.44% | 0.01%                            | 0.19%                            | 0.93%  |
| 80    | 5.310  | 8.00E-03   | 0.20%            | 0.00%            | 28.75% | 6.17%              | 1.27%              | 38.37% | 21.83% | 1.09% | 0.05%                            | 0.05%                            | 2.23%  |

Table S8: Energy (in Ev), oscillator strength and nature of the singlet states of 1-Rh

| State | Energy | Oscillator | M <sub>0</sub> C | M <sub>1</sub> C | LC     | M <sub>0</sub> LCT | M <sub>1</sub> LCT | LLCT   | XLCT   | XMCT  | M <sub>0</sub> M <sub>1</sub> CT | M <sub>0</sub> M <sub>0</sub> CT | Other  |
|-------|--------|------------|------------------|------------------|--------|--------------------|--------------------|--------|--------|-------|----------------------------------|----------------------------------|--------|
| 1     | 1.915  | 0.00E+00   | 3.61%            | 0.00%            | 4.86%  | 75.92%             | 0.03%              | 13.18% | 0.86%  | 0.00% | 0.00%                            | 0.04%                            | 1.50%  |
| 2     | 2.056  | 1.00E-03   | 3.21%            | 0.00%            | 4.43%  | 71.22%             | 0.02%              | 18.52% | 0.85%  | 0.00% | 0.00%                            | 0.03%                            | 1.74%  |
| 3     | 2.275  | 1.31E-01   | 1.75%            | 0.04%            | 11.49% | 69.08%             | 0.44%              | 13.53% | 1.36%  | 0.01% | 0.06%                            | 0.28%                            | 1.97%  |
| 4     | 2.605  | 0.00E+00   | 0.00%            | 37.69%           | 0.28%  | 0.02%              | 5.27%              | 0.01%  | 0.06%  | 0.03% | 18.10%                           | 2.69%                            | 35.85% |
| 5     | 2.639  | 1.00E-03   | 0.01%            | 36.69%           | 0.35%  | 0.24%              | 5.15%              | 0.05%  | 1.01%  | 0.03% | 17.49%                           | 2.59%                            | 36.40% |
| 6     | 2.748  | 1.50E-02   | 2.41%            | 0.07%            | 3.83%  | 57.54%             | 0.06%              | 9.87%  | 13.18% | 0.00% | 0.03%                            | 0.05%                            | 12.97% |
| 7     | 2.872  | 0.00E+00   | 1.55%            | 0.02%            | 2.24%  | 37.07%             | 0.02%              | 9.83%  | 23.68% | 0.00% | 0.01%                            | 0.03%                            | 25.54% |

|    |       |          |        |        |        |        |        |        |        |       |        |        |        |
|----|-------|----------|--------|--------|--------|--------|--------|--------|--------|-------|--------|--------|--------|
| 8  | 2.893 | 1.00E-02 | 1.33%  | 1.08%  | 2.98%  | 37.62% | 0.36%  | 7.42%  | 22.47% | 0.01% | 0.55%  | 0.20%  | 25.98% |
| 9  | 2.916 | 4.00E-03 | 0.09%  | 34.87% | 0.93%  | 2.84%  | 11.01% | 0.36%  | 1.14%  | 0.13% | 17.47% | 5.68%  | 25.50% |
| 10 | 2.941 | 3.00E-03 | 2.43%  | 0.87%  | 11.64% | 69.47% | 0.31%  | 5.08%  | 4.48%  | 0.01% | 0.55%  | 0.23%  | 4.95%  |
| 11 | 2.947 | 8.00E-03 | 1.95%  | 0.49%  | 5.74%  | 46.64% | 0.33%  | 7.61%  | 16.11% | 0.01% | 0.32%  | 0.28%  | 20.52% |
| 12 | 2.975 | 3.50E-02 | 2.97%  | 0.37%  | 7.91%  | 52.91% | 0.31%  | 5.74%  | 12.52% | 0.01% | 0.28%  | 0.32%  | 16.66% |
| 13 | 3.016 | 1.00E-03 | 0.79%  | 0.21%  | 2.01%  | 26.54% | 0.16%  | 6.57%  | 27.71% | 0.00% | 0.12%  | 0.15%  | 35.74% |
| 14 | 3.021 | 1.10E-02 | 1.59%  | 0.28%  | 6.89%  | 64.66% | 0.16%  | 9.59%  | 6.95%  | 0.00% | 0.24%  | 0.17%  | 9.49%  |
| 15 | 3.042 | 2.00E-03 | 0.02%  | 23.42% | 1.08%  | 0.84%  | 14.06% | 0.25%  | 0.43%  | 0.27% | 18.03% | 13.92% | 27.70% |
| 16 | 3.065 | 1.80E-02 | 2.53%  | 0.18%  | 3.78%  | 28.79% | 0.95%  | 4.13%  | 31.77% | 0.03% | 0.18%  | 0.96%  | 26.71% |
| 17 | 3.069 | 6.10E-02 | 0.83%  | 0.95%  | 6.18%  | 34.91% | 16.34% | 7.20%  | 6.51%  | 0.46% | 0.63%  | 16.94% | 9.06%  |
| 18 | 3.072 | 2.50E-02 | 0.72%  | 0.92%  | 4.83%  | 21.24% | 25.68% | 4.35%  | 6.06%  | 0.75% | 0.68%  | 27.16% | 7.63%  |
| 19 | 3.084 | 7.50E-02 | 2.31%  | 0.03%  | 17.04% | 65.30% | 0.54%  | 5.04%  | 4.39%  | 0.02% | 0.03%  | 0.58%  | 4.73%  |
| 20 | 3.123 | 4.70E-02 | 1.92%  | 0.52%  | 8.38%  | 62.84% | 0.65%  | 12.87% | 5.44%  | 0.02% | 0.36%  | 0.64%  | 6.38%  |
| 21 | 3.142 | 3.90E-02 | 0.09%  | 5.16%  | 3.24%  | 3.32%  | 31.31% | 5.04%  | 0.50%  | 1.13% | 3.85%  | 39.73% | 6.63%  |
| 22 | 3.162 | 1.30E-01 | 2.03%  | 1.39%  | 8.04%  | 48.55% | 1.51%  | 11.55% | 11.28% | 0.04% | 0.93%  | 1.53%  | 13.16% |
| 23 | 3.172 | 1.54E-01 | 2.75%  | 0.12%  | 10.61% | 60.65% | 0.15%  | 11.37% | 6.74%  | 0.00% | 0.10%  | 0.15%  | 7.36%  |
| 24 | 3.181 | 1.50E-02 | 2.12%  | 2.99%  | 8.05%  | 37.52% | 1.43%  | 5.03%  | 18.31% | 0.03% | 2.01%  | 1.19%  | 21.32% |
| 25 | 3.190 | 2.10E-02 | 0.42%  | 3.13%  | 2.46%  | 6.39%  | 6.02%  | 58.11% | 3.67%  | 0.19% | 2.49%  | 6.41%  | 10.73% |
| 26 | 3.191 | 6.50E-02 | 2.27%  | 0.60%  | 5.15%  | 27.08% | 0.89%  | 14.88% | 23.60% | 0.03% | 0.42%  | 0.90%  | 24.17% |
| 27 | 3.214 | 2.00E-03 | 0.12%  | 5.73%  | 2.27%  | 2.69%  | 24.42% | 18.53% | 0.07%  | 0.96% | 4.78%  | 31.07% | 9.37%  |
| 28 | 3.216 | 5.80E-02 | 2.09%  | 0.18%  | 13.17% | 69.20% | 0.70%  | 11.76% | 0.51%  | 0.03% | 0.14%  | 0.85%  | 1.37%  |
| 29 | 3.245 | 4.00E-03 | 0.03%  | 0.16%  | 1.53%  | 1.02%  | 0.70%  | 90.16% | 0.02%  | 0.03% | 0.13%  | 0.82%  | 5.41%  |
| 30 | 3.254 | 0.00E+00 | 0.01%  | 25.65% | 1.09%  | 0.17%  | 14.69% | 0.47%  | 0.33%  | 0.43% | 19.30% | 14.21% | 23.66% |
| 31 | 3.312 | 3.00E-03 | 0.39%  | 26.51% | 0.82%  | 2.59%  | 8.29%  | 0.56%  | 6.30%  | 0.16% | 19.46% | 6.09%  | 28.86% |
| 32 | 3.571 | 3.20E-02 | 2.31%  | 0.00%  | 16.67% | 68.51% | 0.07%  | 10.19% | 0.36%  | 0.01% | 0.01%  | 0.08%  | 1.80%  |
| 33 | 3.614 | 0.00E+00 | 0.00%  | 0.05%  | 1.46%  | 0.01%  | 0.53%  | 0.03%  | 0.00%  | 2.18% | 9.58%  | 80.78% | 5.40%  |
| 34 | 3.691 | 0.00E+00 | 0.00%  | 0.10%  | 3.30%  | 0.03%  | 0.80%  | 0.11%  | 0.00%  | 2.11% | 9.09%  | 78.88% | 5.58%  |
| 35 | 3.723 | 2.30E-02 | 0.01%  | 0.19%  | 1.69%  | 0.15%  | 3.01%  | 0.18%  | 0.01%  | 2.18% | 7.86%  | 80.20% | 4.54%  |
| 36 | 3.751 | 2.00E-03 | 0.00%  | 0.30%  | 0.33%  | 0.01%  | 0.18%  | 0.01%  | 0.00%  | 0.57% | 48.02% | 18.21% | 32.38% |
| 37 | 3.847 | 8.00E-03 | 0.01%  | 0.55%  | 0.90%  | 0.38%  | 0.36%  | 0.10%  | 0.01%  | 0.60% | 45.99% | 17.92% | 33.20% |
| 38 | 3.850 | 1.00E-03 | 2.94%  | 0.01%  | 17.33% | 72.52% | 0.08%  | 5.08%  | 0.28%  | 0.01% | 0.26%  | 0.18%  | 1.32%  |
| 39 | 3.865 | 9.00E-03 | 0.00%  | 1.31%  | 0.48%  | 0.03%  | 1.46%  | 0.33%  | 0.06%  | 0.47% | 46.35% | 15.76% | 33.75% |
| 40 | 3.874 | 0.00E+00 | 0.02%  | 0.04%  | 1.03%  | 0.33%  | 0.05%  | 20.62% | 0.29%  | 0.01% | 0.43%  | 0.19%  | 77.01% |
| 41 | 3.926 | 2.00E-03 | 0.06%  | 0.15%  | 1.47%  | 0.91%  | 7.87%  | 18.90% | 0.43%  | 0.44% | 0.64%  | 9.57%  | 59.56% |
| 42 | 3.932 | 1.70E-02 | 0.07%  | 0.56%  | 2.84%  | 0.25%  | 32.45% | 3.34%  | 0.12%  | 1.82% | 0.71%  | 39.72% | 18.13% |
| 43 | 3.954 | 1.00E-03 | 45.46% | 0.00%  | 4.31%  | 32.02% | 0.13%  | 3.43%  | 2.38%  | 0.02% | 0.04%  | 0.16%  | 12.05% |
| 44 | 3.974 | 0.00E+00 | 49.15% | 0.00%  | 4.79%  | 31.70% | 0.14%  | 2.91%  | 0.59%  | 0.01% | 0.04%  | 0.19%  | 10.49% |
| 45 | 3.979 | 9.00E-03 | 0.19%  | 0.46%  | 2.43%  | 0.25%  | 22.71% | 3.63%  | 0.01%  | 1.36% | 21.79% | 34.06% | 13.14% |
| 46 | 3.991 | 0.00E+00 | 0.11%  | 0.47%  | 2.04%  | 0.29%  | 13.56% | 4.38%  | 0.01%  | 0.96% | 33.44% | 26.34% | 18.40% |
| 47 | 4.010 | 4.10E-02 | 3.26%  | 0.01%  | 20.79% | 67.33% | 0.49%  | 5.79%  | 0.10%  | 0.03% | 0.02%  | 0.61%  | 1.59%  |
| 48 | 4.014 | 5.00E-03 | 0.43%  | 0.27%  | 10.12% | 6.20%  | 13.79% | 37.93% | 0.06%  | 0.81% | 0.35%  | 17.90% | 12.15% |
| 49 | 4.028 | 1.00E-03 | 0.12%  | 0.59%  | 6.73%  | 3.55%  | 27.55% | 13.36% | 0.04%  | 1.63% | 2.11%  | 38.35% | 5.99%  |
| 50 | 4.054 | 9.00E-03 | 1.39%  | 0.01%  | 22.24% | 48.83% | 0.50%  | 20.11% | 0.09%  | 0.02% | 0.02%  | 0.61%  | 6.18%  |
| 51 | 4.060 | 1.80E-02 | 2.29%  | 0.01%  | 9.90%  | 36.11% | 0.41%  | 39.66% | 0.09%  | 0.01% | 0.01%  | 0.46%  | 11.05% |
| 52 | 4.064 | 1.60E-02 | 2.32%  | 0.00%  | 11.93% | 37.34% | 0.18%  | 37.53% | 0.09%  | 0.01% | 0.03%  | 0.24%  | 10.34% |
| 53 | 4.098 | 5.90E-02 | 13.35% | 0.40%  | 2.18%  | 7.58%  | 6.09%  | 1.24%  | 0.29%  | 0.40% | 32.00% | 17.04% | 19.45% |
| 54 | 4.099 | 2.30E-02 | 36.06% | 0.14%  | 3.19%  | 19.79% | 2.26%  | 3.10%  | 0.91%  | 0.17% | 11.96% | 6.37%  | 16.05% |
| 55 | 4.107 | 2.00E-03 | 0.17%  | 0.70%  | 0.70%  | 0.21%  | 1.22%  | 0.39%  | 0.07%  | 0.51% | 52.25% | 18.34% | 25.43% |
| 56 | 4.123 | 1.50E-02 | 0.01%  | 0.47%  | 2.70%  | 0.26%  | 34.05% | 0.46%  | 0.01%  | 0.79% | 10.11% | 45.23% | 5.93%  |
| 57 | 4.134 | 1.40E-02 | 0.07%  | 0.24%  | 4.18%  | 1.52%  | 30.90% | 6.75%  | 0.03%  | 0.60% | 2.35%  | 38.92% | 14.44% |
| 58 | 4.136 | 1.10E-02 | 0.29%  | 0.07%  | 6.08%  | 6.02%  | 8.19%  | 13.08% | 0.22%  | 0.15% | 0.19%  | 10.00% | 55.72% |
| 59 | 4.157 | 4.00E-03 | 0.02%  | 0.28%  | 4.10%  | 0.49%  | 39.49% | 2.58%  | 0.00%  | 0.84% | 0.53%  | 50.41% | 1.26%  |
| 60 | 4.163 | 3.00E-03 | 2.10%  | 0.00%  | 15.56% | 75.27% | 0.04%  | 5.87%  | 0.06%  | 0.00% | 0.13%  | 0.10%  | 0.87%  |
| 61 | 4.169 | 2.38E-01 | 0.70%  | 0.01%  | 35.17% | 19.56% | 1.40%  | 13.27% | 0.31%  | 0.03% | 0.14%  | 1.99%  | 27.41% |
| 62 | 4.187 | 6.20E-02 | 0.79%  | 0.00%  | 30.21% | 51.97% | 0.16%  | 10.04% | 0.05%  | 0.00% | 0.03%  | 0.24%  | 6.52%  |
| 63 | 4.194 | 2.40E-02 | 0.20%  | 0.01%  | 8.59%  | 22.15% | 0.75%  | 37.17% | 0.27%  | 0.02% | 0.14%  | 1.05%  | 29.66% |
| 64 | 4.197 | 7.50E-02 | 0.48%  | 0.01%  | 16.74% | 50.98% | 0.61%  | 25.59% | 0.04%  | 0.01% | 0.03%  | 0.75%  | 4.78%  |
| 65 | 4.206 | 6.20E-02 | 0.29%  | 0.01%  | 17.82% | 21.54% | 0.46%  | 40.28% | 0.17%  | 0.01% | 0.05%  | 0.60%  | 18.78% |
| 66 | 4.243 | 2.00E-03 | 0.03%  | 0.00%  | 7.04%  | 1.53%  | 0.26%  | 87.16% | 0.01%  | 0.01% | 0.01%  | 0.32%  | 3.63%  |
| 67 | 4.254 | 1.38E-01 | 0.56%  | 0.00%  | 48.89% | 36.88% | 0.10%  | 9.00%  | 0.08%  | 0.00% | 0.00%  | 0.13%  | 4.36%  |
| 68 | 4.266 | 2.52E-01 | 1.06%  | 0.00%  | 38.40% | 47.24% | 0.06%  | 7.61%  | 0.10%  | 0.00% | 0.01%  | 0.06%  | 5.47%  |
| 69 | 4.277 | 1.05E-01 | 0.28%  | 0.00%  | 76.76% | 13.23% | 0.08%  | 4.00%  | 0.03%  | 0.00% | 0.00%  | 0.09%  | 5.53%  |
| 70 | 4.295 | 4.30E-02 | 1.06%  | 0.00%  | 63.71% | 25.81% | 0.05%  | 6.11%  | 0.03%  | 0.00% | 0.00%  | 0.07%  | 3.17%  |
| 71 | 4.300 | 6.00E-03 | 5.13%  | 0.00%  | 15.81% | 66.43% | 0.11%  | 10.60% | 0.08%  | 0.00% | 0.00%  | 0.10%  | 1.75%  |
| 72 | 4.386 | 3.50E-01 | 2.26%  | 0.00%  | 40.54% | 48.77% | 0.07%  | 6.23%  | 0.03%  | 0.00% | 0.00%  | 0.09%  | 2.00%  |
| 73 | 4.391 | 1.18E+00 | 0.95%  | 0.00%  | 38.75% | 53.89% | 0.10%  | 4.62%  | 0.02%  | 0.01% | 0.00%  | 0.12%  | 1.54%  |
| 74 | 4.449 | 0.00E+00 | 0.02%  | 0.02%  | 3.03%  | 0.03%  | 1.33%  | 0.46%  | 0.00%  | 3.68% | 1.60%  | 88.98% | 0.84%  |
| 75 | 4.474 | 2.00E-03 | 0.00%  | 0.03%  | 0.17%  | 0.05%  | 41.62% | 3.70%  | 0.00%  | 1.31% | 0.01%  | 51.96% | 1.14%  |
| 76 | 4.512 | 5.03E-01 | 0.06%  | 0.38%  | 57.52% | 0.51%  | 1.21%  | 19.52% | 0.02%  | 0.20% | 1.74%  | 9.15%  | 9.69%  |
| 77 | 4.520 | 1.30E-02 | 1.91%  | 0.02%  | 4.29%  | 18.24% | 29.11% | 6.25%  | 0.08%  | 1.10% | 0.05%  | 37.26% | 1.69%  |
| 78 | 4.529 | 2.10E-02 | 3.87%  | 0.03%  | 8.10%  | 33.02% | 11.54% | 7.98%  | 0.16%  | 0.94% | 0.39%  | 31.59% | 2.38%  |
| 79 | 4.533 | 1.40E-02 | 1.16%  | 0.04%  | 5.51%  | 8.59%  | 3.84%  | 2.75%  | 0.04%  | 2.84% | 1.37%  | 72.28% | 1.56%  |
| 80 | 4.540 | 1.00E-03 | 0.06%  | 0.01%  | 0.27%  | 0.30%  | 40.11% | 3.88%  | 0.00%  | 2.46% | 0.04%  | 50.68% | 2.20%  |

Table S9: Energy (in Ev), oscillator strength and nature of the singlet states of 1-Pd

| State | Energy | Oscillator | M <sub>0</sub> C | M <sub>1</sub> C | LC     | M <sub>0</sub> LCT | M <sub>1</sub> LCT | LLCT   | XLCT  | XMCT   | M <sub>0</sub> M <sub>1</sub> CT | M <sub>1</sub> M <sub>0</sub> CT | Other  |
|-------|--------|------------|------------------|------------------|--------|--------------------|--------------------|--------|-------|--------|----------------------------------|----------------------------------|--------|
| 1     | 1.962  | 0.00E+00   | 3.35%            | 0.00%            | 5.08%  | 76.97%             | 0.05%              | 12.12% | 0.01% | 0.00%  | 1.10%                            | 0.00%                            | 1.32%  |
| 2     | 2.115  | 1.00E-03   | 2.90%            | 0.00%            | 4.29%  | 70.79%             | 0.05%              | 19.20% | 0.01% | 0.00%  | 1.08%                            | 0.00%                            | 1.67%  |
| 3     | 2.306  | 1.32E-01   | 1.61%            | 0.02%            | 11.39% | 69.77%             | 0.44%              | 13.24% | 0.28% | 0.05%  | 1.53%                            | 0.01%                            | 1.67%  |
| 4     | 2.596  | 1.00E-03   | 1.71%            | 2.61%            | 1.36%  | 15.22%             | 0.96%              | 2.55%  | 0.08% | 0.16%  | 38.18%                           | 0.02%                            | 37.15% |
| 5     | 2.666  | 2.00E-03   | 0.08%            | 35.03%           | 0.86%  | 0.85%              | 12.59%             | 0.18%  | 4.97% | 13.53% | 1.93%                            | 0.22%                            | 29.76% |
| 6     | 2.670  | 4.00E-03   | 0.16%            | 37.62%           | 1.02%  | 1.72%              | 13.68%             | 0.33%  | 3.22% | 8.17%  | 3.81%                            | 0.24%                            | 30.06% |
| 7     | 2.704  | 1.00E-03   | 0.94%            | 6.44%            | 2.45%  | 11.47%             | 2.21%              | 2.17%  | 1.01% | 2.88%  | 30.37%                           | 0.04%                            | 40.03% |
| 8     | 2.742  | 1.00E-03   | 1.60%            | 4.13%            | 1.02%  | 12.98%             | 1.53%              | 3.82%  | 0.31% | 0.69%  | 33.65%                           | 0.03%                            | 40.25% |
| 9     | 2.782  | 7.00E-03   | 1.50%            | 14.56%           | 3.07%  | 39.94%             | 5.02%              | 6.55%  | 3.45% | 9.87%  | 1.38%                            | 0.08%                            | 14.60% |
| 10    | 2.793  | 1.40E-02   | 1.36%            | 16.80%           | 2.78%  | 35.51%             | 5.93%              | 6.04%  | 3.72% | 10.55% | 1.14%                            | 0.10%                            | 16.07% |
| 11    | 2.885  | 1.00E-03   | 0.27%            | 28.73%           | 1.15%  | 2.98%              | 9.88%              | 0.62%  | 4.29% | 12.32% | 7.36%                            | 0.17%                            | 32.23% |
| 12    | 2.915  | 3.00E-03   | 1.92%            | 0.00%            | 12.54% | 78.64%             | 0.03%              | 5.10%  | 0.01% | 0.00%  | 0.72%                            | 0.00%                            | 1.05%  |
| 13    | 2.924  | 9.00E-03   | 2.59%            | 0.06%            | 4.86%  | 70.17%             | 0.13%              | 18.20% | 0.04% | 0.02%  | 2.14%                            | 0.00%                            | 1.78%  |
| 14    | 2.937  | 1.00E-03   | 5.11%            | 0.00%            | 11.28% | 76.87%             | 0.03%              | 5.55%  | 0.01% | 0.00%  | 0.06%                            | 0.00%                            | 1.09%  |
| 15    | 3.025  | 2.40E-02   | 1.27%            | 0.00%            | 9.21%  | 74.11%             | 0.12%              | 13.13% | 0.08% | 0.00%  | 1.15%                            | 0.01%                            | 0.93%  |

|    |       |          |        |        |        |        |        |        |        |        |       |       |        |
|----|-------|----------|--------|--------|--------|--------|--------|--------|--------|--------|-------|-------|--------|
| 16 | 3.063 | 9.50E-02 | 2.08%  | 0.00%  | 19.21% | 72.28% | 0.04%  | 5.09%  | 0.02%  | 0.00%  | 0.30% | 0.00% | 0.98%  |
| 17 | 3.071 | 1.83E-01 | 1.19%  | 0.02%  | 9.09%  | 74.28% | 0.14%  | 13.42% | 0.09%  | 0.03%  | 0.83% | 0.00% | 0.91%  |
| 18 | 3.129 | 9.00E-03 | 3.61%  | 0.00%  | 14.20% | 70.00% | 0.13%  | 10.40% | 0.07%  | 0.01%  | 0.24% | 0.01% | 1.33%  |
| 19 | 3.155 | 1.60E-02 | 0.27%  | 2.11%  | 4.56%  | 4.59%  | 43.45% | 0.75%  | 39.99% | 1.94%  | 0.01% | 1.02% | 1.32%  |
| 20 | 3.165 | 1.87E-01 | 3.99%  | 0.16%  | 13.37% | 65.40% | 3.01%  | 9.52%  | 2.83%  | 0.14%  | 0.09% | 0.06% | 1.44%  |
| 21 | 3.181 | 1.51E-01 | 1.05%  | 0.00%  | 8.20%  | 73.48% | 0.08%  | 16.18% | 0.05%  | 0.03%  | 0.36% | 0.00% | 0.57%  |
| 22 | 3.184 | 3.00E-03 | 0.00%  | 2.03%  | 4.92%  | 0.11%  | 80.93% | 0.18%  | 8.75%  | 0.47%  | 0.00% | 1.81% | 0.79%  |
| 23 | 3.237 | 6.00E-02 | 0.79%  | 0.03%  | 11.92% | 72.34% | 0.21%  | 13.56% | 0.18%  | 0.01%  | 0.41% | 0.00% | 0.56%  |
| 24 | 3.274 | 4.00E-03 | 0.01%  | 0.02%  | 1.53%  | 0.52%  | 0.54%  | 91.89% | 0.39%  | 0.03%  | 0.01% | 0.02% | 5.05%  |
| 25 | 3.328 | 3.00E-03 | 0.02%  | 0.00%  | 1.45%  | 0.91%  | 0.03%  | 92.44% | 0.04%  | 0.00%  | 0.02% | 0.00% | 5.07%  |
| 26 | 3.424 | 6.20E-02 | 0.07%  | 1.15%  | 5.56%  | 1.16%  | 46.58% | 1.35%  | 39.86% | 1.98%  | 0.01% | 1.29% | 1.00%  |
| 27 | 3.453 | 0.00E+00 | 0.00%  | 0.92%  | 3.46%  | 0.02%  | 32.52% | 0.07%  | 58.59% | 2.98%  | 0.00% | 0.70% | 0.75%  |
| 28 | 3.553 | 4.90E-02 | 2.20%  | 0.01%  | 15.72% | 66.92% | 0.07%  | 9.59%  | 0.73%  | 1.96%  | 0.21% | 0.00% | 2.58%  |
| 29 | 3.561 | 1.00E-02 | 0.10%  | 0.30%  | 1.27%  | 2.70%  | 0.16%  | 0.48%  | 17.06% | 49.15% | 0.02% | 0.00% | 28.78% |
| 30 | 3.710 | 0.00E+00 | 0.00%  | 0.02%  | 3.71%  | 0.02%  | 0.69%  | 0.14%  | 90.27% | 4.35%  | 0.00% | 0.02% | 0.80%  |
| 31 | 3.716 | 0.00E+00 | 0.03%  | 0.01%  | 0.64%  | 0.13%  | 0.00%  | 18.37% | 0.16%  | 0.02%  | 0.27% | 0.00% | 80.37% |
| 32 | 3.770 | 2.00E-03 | 0.35%  | 0.00%  | 0.72%  | 0.43%  | 0.00%  | 18.22% | 0.00%  | 0.01%  | 0.42% | 0.00% | 79.85% |
| 33 | 3.813 | 3.00E-03 | 3.41%  | 0.00%  | 16.21% | 74.18% | 0.05%  | 4.97%  | 0.03%  | 0.00%  | 0.16% | 0.00% | 0.98%  |
| 34 | 3.929 | 4.00E-03 | 43.37% | 0.00%  | 5.42%  | 36.05% | 0.10%  | 3.56%  | 0.07%  | 0.01%  | 1.09% | 0.02% | 10.30% |
| 35 | 3.957 | 2.40E-02 | 0.04%  | 1.28%  | 4.66%  | 1.37%  | 41.99% | 0.61%  | 44.65% | 3.11%  | 0.00% | 1.80% | 0.50%  |
| 36 | 3.958 | 0.00E+00 | 50.39% | 0.00%  | 4.49%  | 31.50% | 0.04%  | 2.88%  | 0.04%  | 0.01%  | 0.26% | 0.01% | 10.41% |
| 37 | 3.979 | 4.40E-02 | 7.24%  | 0.02%  | 19.65% | 65.40% | 0.65%  | 4.25%  | 0.66%  | 0.04%  | 0.20% | 0.03% | 1.86%  |
| 38 | 4.011 | 4.00E-03 | 0.75%  | 0.00%  | 27.07% | 32.54% | 0.17%  | 37.10% | 0.11%  | 0.01%  | 0.05% | 0.01% | 2.19%  |
| 39 | 4.026 | 5.00E-03 | 4.13%  | 0.00%  | 13.37% | 72.25% | 0.11%  | 8.95%  | 0.09%  | 0.00%  | 0.09% | 0.00% | 1.00%  |
| 40 | 4.037 | 4.00E-03 | 0.05%  | 1.77%  | 3.90%  | 0.12%  | 79.14% | 0.25%  | 10.03% | 0.72%  | 0.00% | 3.60% | 0.44%  |
| 41 | 4.047 | 1.00E-03 | 0.66%  | 0.01%  | 8.69%  | 32.71% | 0.29%  | 53.02% | 0.22%  | 0.01%  | 0.02% | 0.01% | 4.37%  |
| 42 | 4.074 | 4.00E-02 | 26.97% | 0.00%  | 8.28%  | 16.26% | 0.07%  | 38.60% | 0.07%  | 0.01%  | 0.28% | 0.01% | 9.45%  |
| 43 | 4.083 | 1.80E-02 | 23.55% | 0.00%  | 6.21%  | 14.28% | 0.15%  | 46.33% | 0.20%  | 0.02%  | 0.24% | 0.01% | 8.99%  |
| 44 | 4.126 | 1.20E-02 | 2.45%  | 0.00%  | 14.51% | 76.17% | 0.13%  | 5.85%  | 0.12%  | 0.01%  | 0.05% | 0.01% | 0.71%  |
| 45 | 4.135 | 1.00E-03 | 0.02%  | 0.76%  | 4.78%  | 0.35%  | 44.57% | 0.71%  | 45.19% | 1.91%  | 0.01% | 1.33% | 0.40%  |
| 46 | 4.160 | 3.50E-02 | 0.82%  | 0.00%  | 36.93% | 55.49% | 0.05%  | 5.25%  | 0.02%  | 0.00%  | 0.05% | 0.00% | 1.40%  |
| 47 | 4.162 | 8.10E-02 | 0.64%  | 0.00%  | 16.79% | 75.64% | 0.05%  | 6.49%  | 0.03%  | 0.00%  | 0.03% | 0.00% | 0.33%  |
| 48 | 4.172 | 1.87E-01 | 0.91%  | 0.00%  | 40.86% | 43.45% | 0.06%  | 11.81% | 0.05%  | 0.00%  | 0.04% | 0.00% | 2.83%  |
| 49 | 4.228 | 3.60E-02 | 0.24%  | 0.40%  | 17.47% | 9.49%  | 62.00% | 1.72%  | 6.98%  | 0.16%  | 0.01% | 0.82% | 0.71%  |
| 50 | 4.229 | 1.21E-01 | 0.68%  | 0.14%  | 40.27% | 27.95% | 21.57% | 4.92%  | 2.51%  | 0.05%  | 0.03% | 0.29% | 1.60%  |
| 51 | 4.234 | 1.00E-03 | 0.00%  | 1.67%  | 3.91%  | 0.05%  | 32.06% | 0.14%  | 52.06% | 5.80%  | 0.00% | 1.42% | 2.89%  |
| 52 | 4.240 | 3.20E-01 | 1.01%  | 0.00%  | 33.39% | 55.43% | 0.09%  | 8.87%  | 0.08%  | 0.00%  | 0.05% | 0.00% | 1.09%  |
| 53 | 4.262 | 7.00E-03 | 3.16%  | 0.00%  | 34.05% | 41.83% | 0.08%  | 18.08% | 0.08%  | 0.00%  | 0.02% | 0.00% | 2.70%  |
| 54 | 4.268 | 8.00E-03 | 1.40%  | 0.00%  | 34.54% | 27.92% | 0.24%  | 32.60% | 0.17%  | 0.00%  | 0.01% | 0.01% | 3.11%  |
| 55 | 4.278 | 2.60E-02 | 0.09%  | 0.00%  | 37.93% | 5.15%  | 0.35%  | 54.42% | 0.25%  | 0.00%  | 0.00% | 0.00% | 1.80%  |
| 56 | 4.280 | 1.17E-01 | 0.28%  | 0.94%  | 13.43% | 4.95%  | 37.53% | 2.06%  | 37.02% | 1.71%  | 0.00% | 0.98% | 1.09%  |
| 57 | 4.282 | 5.00E-02 | 0.85%  | 0.16%  | 55.47% | 21.48% | 6.37%  | 5.60%  | 6.41%  | 0.31%  | 0.01% | 0.18% | 3.17%  |
| 58 | 4.318 | 0.00E+00 | 0.01%  | 11.74% | 4.29%  | 0.04%  | 6.17%  | 0.12%  | 13.44% | 26.74% | 0.05% | 0.15% | 37.27% |
| 59 | 4.326 | 1.30E-02 | 0.17%  | 0.03%  | 2.13%  | 3.53%  | 1.16%  | 89.45% | 1.40%  | 0.06%  | 0.01% | 0.03% | 2.04%  |
| 60 | 4.367 | 1.28E+00 | 1.02%  | 0.01%  | 43.02% | 47.71% | 1.17%  | 4.33%  | 1.04%  | 0.02%  | 0.02% | 0.01% | 1.66%  |
| 61 | 4.369 | 3.62E-01 | 1.49%  | 0.00%  | 50.30% | 37.94% | 0.11%  | 7.75%  | 0.08%  | 0.00%  | 0.02% | 0.00% | 2.31%  |
| 62 | 4.370 | 3.00E-02 | 0.03%  | 0.38%  | 11.51% | 1.50%  | 46.30% | 1.75%  | 36.49% | 0.76%  | 0.01% | 0.62% | 0.65%  |
| 63 | 4.398 | 0.00E+00 | 0.00%  | 0.16%  | 4.24%  | 0.03%  | 20.74% | 0.12%  | 70.71% | 3.37%  | 0.00% | 0.28% | 0.35%  |
| 64 | 4.459 | 2.00E-03 | 0.00%  | 0.01%  | 0.26%  | 0.03%  | 39.69% | 4.29%  | 53.19% | 1.34%  | 0.00% | 0.99% | 0.20%  |
| 65 | 4.510 | 5.82E-01 | 0.04%  | 0.29%  | 57.42% | 0.35%  | 9.28%  | 6.08%  | 19.74% | 1.43%  | 0.01% | 0.27% | 5.09%  |
| 66 | 4.525 | 4.10E-02 | 6.69%  | 0.01%  | 14.06% | 63.62% | 0.73%  | 10.44% | 1.07%  | 0.13%  | 0.29% | 0.04% | 2.93%  |
| 67 | 4.531 | 0.00E+00 | 0.10%  | 0.00%  | 0.23%  | 0.74%  | 38.61% | 4.23%  | 51.28% | 2.60%  | 0.00% | 1.95% | 0.26%  |
| 68 | 4.546 | 0.00E+00 | 0.04%  | 0.76%  | 3.61%  | 0.10%  | 16.69% | 0.14%  | 71.39% | 5.47%  | 0.00% | 0.23% | 1.58%  |
| 69 | 4.566 | 4.00E-03 | 46.38% | 0.00%  | 5.89%  | 31.63% | 0.11%  | 3.57%  | 0.12%  | 0.03%  | 0.21% | 0.03% | 12.03% |
| 70 | 4.572 | 2.00E-03 | 46.39% | 0.05%  | 5.16%  | 31.21% | 0.12%  | 4.41%  | 0.07%  | 0.06%  | 0.28% | 0.01% | 12.26% |
| 71 | 4.606 | 0.00E+00 | 0.03%  | 0.03%  | 0.10%  | 0.06%  | 79.87% | 3.69%  | 13.83% | 0.35%  | 0.00% | 1.92% | 0.13%  |
| 72 | 4.607 | 0.00E+00 | 0.03%  | 16.25% | 0.76%  | 0.04%  | 6.93%  | 0.11%  | 15.16% | 32.95% | 0.01% | 0.11% | 27.66% |
| 73 | 4.657 | 1.00E-03 | 0.28%  | 0.01%  | 2.81%  | 0.96%  | 0.05%  | 90.52% | 0.31%  | 0.03%  | 0.01% | 0.00% | 5.01%  |
| 74 | 4.663 | 1.00E-03 | 4.80%  | 0.11%  | 1.09%  | 3.81%  | 40.54% | 6.39%  | 38.86% | 1.27%  | 0.04% | 1.06% | 2.03%  |
| 75 | 4.669 | 0.00E+00 | 0.24%  | 5.83%  | 14.05% | 0.36%  | 2.23%  | 1.12%  | 2.33%  | 4.32%  | 0.53% | 0.03% | 68.96% |
| 76 | 4.678 | 0.00E+00 | 0.90%  | 0.00%  | 0.23%  | 0.74%  | 76.13% | 3.96%  | 13.06% | 0.66%  | 0.01% | 3.85% | 0.46%  |
| 77 | 4.681 | 2.00E-03 | 30.63% | 0.01%  | 6.19%  | 23.57% | 6.83%  | 16.46% | 5.62%  | 0.17%  | 0.22% | 0.23% | 10.08% |
| 78 | 4.693 | 5.00E-03 | 0.05%  | 0.16%  | 5.86%  | 1.35%  | 5.31%  | 74.97% | 7.16%  | 0.44%  | 0.02% | 0.12% | 4.55%  |
| 79 | 4.713 | 0.00E+00 | 0.00%  | 0.06%  | 3.82%  | 0.04%  | 1.92%  | 0.18%  | 91.47% | 1.84%  | 0.00% | 0.03% | 0.64%  |
| 80 | 4.737 | 1.00E-03 | 0.04%  | 0.00%  | 0.33%  | 0.28%  | 44.44% | 5.88%  | 44.23% | 2.24%  | 0.00% | 2.24% | 0.32%  |

Table S10: Energy (in Ev), oscillator strength and nature of the singlet states of 1-Cd

| State | Energy | Oscillator | M <sub>2</sub> C | M <sub>0</sub> C | LC     | M <sub>2</sub> LCT | M <sub>0</sub> LCT | LLCT   | XLCT  | XMCT  | M <sub>2</sub> M <sub>0</sub> CT | M <sub>0</sub> M <sub>2</sub> CT | Other |
|-------|--------|------------|------------------|------------------|--------|--------------------|--------------------|--------|-------|-------|----------------------------------|----------------------------------|-------|
| 1     | 2.096  | 0.00E+00   | 3.34%            | 0.00%            | 5.30%  | 77.89%             | 0.03%              | 12.15% | 0.03% | 0.00% | 0.29%                            | 0.00%                            | 0.97% |
| 2     | 2.239  | 1.00E-03   | 2.91%            | 0.00%            | 4.63%  | 71.99%             | 0.03%              | 18.91% | 0.03% | 0.00% | 0.29%                            | 0.00%                            | 1.22% |
| 3     | 2.432  | 1.22E-01   | 1.66%            | 0.00%            | 11.89% | 71.32%             | 0.01%              | 13.53% | 0.04% | 0.01% | 0.44%                            | 0.00%                            | 1.09% |
| 4     | 2.843  | 2.40E-02   | 2.38%            | 0.00%            | 5.48%  | 76.88%             | 0.03%              | 13.31% | 0.03% | 0.00% | 0.87%                            | 0.00%                            | 1.02% |
| 5     | 2.883  | 3.00E-03   | 2.18%            | 0.00%            | 12.98% | 78.71%             | 0.03%              | 5.58%  | 0.02% | 0.00% | 0.01%                            | 0.00%                            | 0.49% |
| 6     | 2.909  | 1.00E-03   | 5.00%            | 0.00%            | 11.85% | 76.27%             | 0.02%              | 5.73%  | 0.02% | 0.00% | 0.01%                            | 0.00%                            | 1.10% |
| 7     | 2.974  | 1.10E-02   | 2.24%            | 0.00%            | 5.45%  | 70.62%             | 0.02%              | 19.58% | 0.03% | 0.00% | 0.77%                            | 0.00%                            | 1.29% |
| 8     | 3.025  | 9.70E-02   | 2.04%            | 0.00%            | 20.18% | 71.46%             | 0.02%              | 5.56%  | 0.03% | 0.00% | 0.01%                            | 0.00%                            | 0.70% |
| 9     | 3.046  | 5.80E-02   | 0.45%            | 0.00%            | 12.80% | 72.91%             | 0.01%              | 13.09% | 0.02% | 0.00% | 0.33%                            | 0.00%                            | 0.39% |
| 10    | 3.087  | 0.00E+00   | 2.70%            | 0.00%            | 10.06% | 74.82%             | 0.02%              | 11.35% | 0.02% | 0.00% | 0.13%                            | 0.00%                            | 0.90% |
| 11    | 3.105  | 1.57E-01   | 3.42%            | 0.00%            | 11.97% | 72.93%             | 0.03%              | 10.35% | 0.03% | 0.00% | 0.14%                            | 0.00%                            | 1.13% |
| 12    | 3.122  | 1.87E-01   | 4.36%            | 0.00%            | 14.07% | 69.77%             | 0.01%              | 10.33% | 0.02% | 0.00% | 0.42%                            | 0.00%                            | 1.43% |
| 13    | 3.221  | 8.10E-02   | 0.89%            | 0.00%            | 7.04%  | 73.95%             | 0.03%              | 17.70% | 0.02% | 0.00% | 0.05%                            | 0.00%                            | 0.32% |
| 14    | 3.291  | 9.40E-02   | 0.87%            | 0.00%            | 12.30% | 72.62%             | 0.01%              | 13.77% | 0.01% | 0.00% | 0.06%                            | 0.00%                            | 0.37% |
| 15    | 3.447  | 0.00E+00   | 0.04%            | 0.00%            | 1.99%  | 1.95%              | 0.00%              | 92.28% | 0.00% | 0.00% | 0.01%                            | 0.00%                            | 3.73% |
| 16    | 3.501  | 4.00E-03   | 0.03%            | 0.00%            | 1.81%  | 0.82%              | 0.00%              | 93.59% | 0.01% | 0.00% | 0.01%                            | 0.00%                            | 3.75% |
| 17    | 3.541  | 5.50E-02   | 2.09%            | 0.00%            | 15.12% | 69.09%             | 0.02%              | 12.23% | 0.02% | 0.00% | 0.39%                            | 0.00%                            | 1.34% |
| 18    | 3.787  | 4.00E-03   | 2.21%            | 0.00%            | 16.05% | 75.41%             | 0.03%              | 5.58%  | 0.03% | 0.00% | 0.06%                            | 0.00%                            | 0.63% |
| 19    | 3.910  | 1.10E-02   | 35.13%           | 0.00%            | 8.77%  | 44.76%             | 0.01%              | 3.85%  | 0.01% | 0.01% | 0.21%                            | 0.02%                            | 7.24% |
| 20    | 3.941  | 3.40E-02   | 18.27%           | 0.00%            | 15.77% | 57.68%             | 0.02%              | 4.19%  | 0.02% | 0.01% | 0.12%                            | 0.01%                            | 3.92% |
| 21    | 3.948  | 1.00E-03   | 39.40%           | 0.00%            | 6.36%  | 41.31%             | 0.00%              | 4.42%  | 0.01% | 0.00% | 0.45%                            | 0.00%                            | 8.05% |
| 22    | 3.987  | 0.00E+00   | 2.45%            | 0.00%            | 24.78% | 66.13%             | 0.03%              | 5.63%  | 0.02% | 0.00% | 0.03%                            | 0.00%                            | 0.93% |
| 23    | 3.993  | 5.00E-03   | 14.15%           | 0.00%            | 13.36% | 60.87%             | 0.01%              | 8.24%  | 0.02% | 0.00% | 0.13%                            | 0.00%                            | 3.22% |

|    |       |          |        |       |        |        |       |        |        |       |        |       |        |
|----|-------|----------|--------|-------|--------|--------|-------|--------|--------|-------|--------|-------|--------|
| 24 | 4.071 | 6.00E-03 | 50.97% | 0.00% | 4.19%  | 27.32% | 0.00% | 3.74%  | 0.02%  | 0.01% | 0.42%  | 0.01% | 13.33% |
| 25 | 4.083 | 3.00E-03 | 2.41%  | 0.00% | 14.28% | 74.24% | 0.02% | 8.26%  | 0.02%  | 0.00% | 0.02%  | 0.00% | 0.76%  |
| 26 | 4.104 | 2.70E-02 | 0.44%  | 0.00% | 24.18% | 23.65% | 0.00% | 50.09% | 0.01%  | 0.00% | 0.02%  | 0.00% | 1.62%  |
| 27 | 4.112 | 6.40E-02 | 0.70%  | 0.00% | 18.83% | 71.24% | 0.02% | 8.78%  | 0.04%  | 0.00% | 0.01%  | 0.00% | 0.36%  |
| 28 | 4.134 | 1.55E-01 | 0.89%  | 0.00% | 31.09% | 42.11% | 0.01% | 24.70% | 0.06%  | 0.00% | 0.03%  | 0.00% | 1.10%  |
| 29 | 4.136 | 1.00E-03 | 0.73%  | 0.00% | 16.54% | 49.30% | 0.01% | 31.23% | 0.02%  | 0.00% | 0.03%  | 0.00% | 2.14%  |
| 30 | 4.145 | 4.00E-03 | 0.02%  | 0.03% | 9.50%  | 0.22%  | 4.72% | 0.52%  | 81.56% | 2.71% | 0.00%  | 0.13% | 0.59%  |
| 31 | 4.174 | 0.00E+00 | 0.00%  | 0.02% | 0.05%  | 0.01%  | 2.81% | 0.01%  | 93.68% | 3.09% | 0.00%  | 0.08% | 0.26%  |
| 32 | 4.177 | 5.90E-02 | 0.39%  | 0.00% | 10.95% | 31.05% | 0.01% | 54.93% | 0.03%  | 0.00% | 0.04%  | 0.00% | 2.62%  |
| 33 | 4.211 | 1.78E-01 | 1.72%  | 0.00% | 29.15% | 49.26% | 0.02% | 17.38% | 0.04%  | 0.00% | 0.05%  | 0.00% | 2.40%  |
| 34 | 4.213 | 1.27E-01 | 0.87%  | 0.00% | 43.10% | 37.62% | 0.01% | 15.54% | 0.04%  | 0.00% | 0.03%  | 0.00% | 2.79%  |
| 35 | 4.217 | 0.00E+00 | 0.01%  | 0.02% | 0.17%  | 0.19%  | 2.22% | 0.05%  | 93.84% | 3.15% | 0.00%  | 0.06% | 0.30%  |
| 36 | 4.219 | 7.00E-03 | 3.42%  | 0.00% | 16.62% | 67.02% | 0.01% | 11.44% | 0.28%  | 0.01% | 0.01%  | 0.00% | 1.20%  |
| 37 | 4.251 | 2.00E-03 | 0.03%  | 0.02% | 20.32% | 0.64%  | 2.98% | 1.70%  | 70.88% | 2.36% | 0.00%  | 0.08% | 1.00%  |
| 38 | 4.269 | 3.40E-02 | 1.00%  | 0.00% | 64.51% | 26.90% | 0.02% | 4.32%  | 0.35%  | 0.01% | 0.01%  | 0.00% | 2.88%  |
| 39 | 4.278 | 9.00E-03 | 0.03%  | 0.00% | 90.33% | 1.52%  | 0.00% | 3.74%  | 0.00%  | 0.00% | 0.00%  | 0.00% | 4.38%  |
| 40 | 4.342 | 1.48E+00 | 0.84%  | 0.00% | 51.39% | 37.59% | 0.01% | 7.71%  | 0.01%  | 0.00% | 0.01%  | 0.00% | 2.44%  |
| 41 | 4.349 | 4.14E-01 | 0.91%  | 0.00% | 66.33% | 24.46% | 0.01% | 4.54%  | 0.03%  | 0.00% | 0.03%  | 0.00% | 3.69%  |
| 42 | 4.384 | 6.30E-02 | 0.01%  | 0.00% | 3.69%  | 1.17%  | 0.00% | 93.75% | 0.00%  | 0.00% | 0.00%  | 0.00% | 1.37%  |
| 43 | 4.433 | 1.00E-03 | 0.16%  | 0.00% | 2.34%  | 1.81%  | 0.00% | 94.24% | 0.01%  | 0.00% | 0.07%  | 0.00% | 1.38%  |
| 44 | 4.465 | 1.70E-02 | 5.37%  | 0.02% | 4.11%  | 23.85% | 0.01% | 4.00%  | 0.04%  | 0.03% | 35.33% | 0.00% | 27.24% |
| 45 | 4.508 | 1.80E-02 | 6.13%  | 0.00% | 9.74%  | 47.53% | 0.03% | 8.21%  | 0.18%  | 0.01% | 14.92% | 0.00% | 13.25% |
| 46 | 4.531 | 1.00E-03 | 31.94% | 0.00% | 4.02%  | 24.71% | 0.01% | 3.62%  | 0.03%  | 0.01% | 14.74% | 0.00% | 20.93% |
| 47 | 4.563 | 0.00E+00 | 33.66% | 0.00% | 5.01%  | 28.13% | 0.01% | 4.19%  | 0.05%  | 0.01% | 11.13% | 0.01% | 17.80% |
| 48 | 4.624 | 0.00E+00 | 11.81% | 0.01% | 3.76%  | 23.24% | 0.02% | 4.54%  | 0.10%  | 0.02% | 28.30% | 0.00% | 28.20% |
| 49 | 4.644 | 7.00E-03 | 16.15% | 0.01% | 3.47%  | 17.99% | 0.01% | 3.14%  | 0.06%  | 0.01% | 29.21% | 0.00% | 29.96% |
| 50 | 4.675 | 8.63E-01 | 0.12%  | 0.02% | 82.13% | 0.56%  | 0.07% | 12.65% | 0.14%  | 0.04% | 0.17%  | 0.00% | 4.09%  |
| 51 | 4.686 | 2.00E-03 | 38.98% | 0.00% | 7.14%  | 28.97% | 0.09% | 5.94%  | 0.51%  | 0.03% | 3.65%  | 0.01% | 14.68% |
| 52 | 4.751 | 0.00E+00 | 1.18%  | 0.03% | 41.40% | 3.27%  | 4.39% | 26.97% | 18.91% | 0.57% | 0.04%  | 0.13% | 3.13%  |
| 53 | 4.809 | 1.00E-03 | 1.45%  | 0.00% | 5.15%  | 44.13% | 0.41% | 43.06% | 3.07%  | 0.10% | 0.33%  | 0.01% | 2.28%  |
| 54 | 4.833 | 1.20E-02 | 0.65%  | 0.03% | 6.13%  | 20.32% | 4.93% | 26.87% | 37.97% | 1.30% | 0.16%  | 0.13% | 1.51%  |
| 55 | 4.844 | 5.00E-03 | 0.02%  | 0.04% | 9.83%  | 0.19%  | 4.57% | 0.80%  | 80.19% | 3.52% | 0.00%  | 0.18% | 0.67%  |
| 56 | 4.866 | 1.20E-02 | 0.31%  | 0.03% | 7.48%  | 8.97%  | 5.32% | 35.80% | 38.93% | 1.34% | 0.02%  | 0.15% | 1.66%  |
| 57 | 4.873 | 0.00E+00 | 0.00%  | 0.02% | 0.06%  | 0.01%  | 2.76% | 0.03%  | 92.75% | 4.09% | 0.00%  | 0.10% | 0.19%  |
| 58 | 4.885 | 1.34E-01 | 0.14%  | 0.01% | 12.72% | 7.32%  | 0.37% | 74.03% | 1.91%  | 0.08% | 0.02%  | 0.01% | 3.99%  |
| 59 | 4.899 | 2.10E-02 | 0.86%  | 0.00% | 16.83% | 58.36% | 0.12% | 21.29% | 1.20%  | 0.05% | 0.14%  | 0.00% | 1.14%  |
| 60 | 4.911 | 2.50E-02 | 1.64%  | 0.00% | 11.57% | 52.55% | 0.54% | 29.56% | 2.09%  | 0.08% | 0.20%  | 0.02% | 1.75%  |
| 61 | 4.915 | 0.00E+00 | 0.01%  | 0.02% | 0.27%  | 0.80%  | 2.16% | 0.29%  | 91.96% | 4.19% | 0.00%  | 0.08% | 0.22%  |
| 62 | 4.937 | 0.00E+00 | 0.02%  | 0.03% | 21.08% | 0.75%  | 3.35% | 3.20%  | 67.27% | 3.01% | 0.01%  | 0.11% | 1.19%  |
| 63 | 4.952 | 7.00E-03 | 0.06%  | 0.06% | 27.95% | 1.06%  | 8.45% | 19.24% | 39.63% | 1.39% | 0.02%  | 0.23% | 1.93%  |
| 64 | 4.968 | 1.00E-03 | 0.61%  | 0.01% | 10.49% | 17.87% | 0.74% | 63.37% | 3.56%  | 0.15% | 0.07%  | 0.02% | 3.11%  |
| 65 | 4.996 | 4.60E-02 | 0.13%  | 0.01% | 13.18% | 4.18%  | 1.50% | 70.69% | 6.68%  | 0.23% | 0.02%  | 0.04% | 3.34%  |
| 66 | 5.035 | 3.80E-02 | 0.02%  | 0.00% | 93.89% | 1.62%  | 0.01% | 3.41%  | 0.03%  | 0.00% | 0.00%  | 0.00% | 1.03%  |
| 67 | 5.090 | 0.00E+00 | 0.00%  | 0.01% | 6.61%  | 0.10%  | 4.28% | 0.35%  | 86.83% | 1.63% | 0.00%  | 0.07% | 0.14%  |
| 68 | 5.095 | 5.30E-02 | 0.01%  | 0.00% | 92.80% | 2.17%  | 0.01% | 3.80%  | 0.08%  | 0.00% | 0.00%  | 0.00% | 1.13%  |
| 69 | 5.108 | 0.00E+00 | 0.00%  | 0.00% | 0.07%  | 0.00%  | 2.83% | 0.01%  | 95.61% | 1.44% | 0.00%  | 0.04% | 0.00%  |
| 70 | 5.126 | 1.00E-03 | 0.05%  | 0.00% | 9.63%  | 1.12%  | 0.61% | 83.48% | 1.45%  | 0.04% | 0.00%  | 0.02% | 3.60%  |
| 71 | 5.151 | 0.00E+00 | 0.00%  | 0.00% | 0.10%  | 0.01%  | 2.22% | 0.07%  | 96.12% | 1.44% | 0.00%  | 0.03% | 0.01%  |
| 72 | 5.180 | 1.00E-03 | 0.01%  | 0.00% | 11.48% | 0.35%  | 3.44% | 2.87%  | 79.85% | 1.58% | 0.00%  | 0.08% | 0.35%  |
| 73 | 5.183 | 0.00E+00 | 0.00%  | 0.00% | 3.24%  | 0.09%  | 2.94% | 0.65%  | 90.46% | 2.45% | 0.00%  | 0.08% | 0.09%  |
| 74 | 5.193 | 2.00E-03 | 0.01%  | 0.00% | 9.07%  | 0.46%  | 3.63% | 3.95%  | 80.22% | 2.36% | 0.00%  | 0.10% | 0.21%  |
| 75 | 5.205 | 1.00E-03 | 0.14%  | 0.01% | 71.52% | 6.60%  | 0.14% | 16.20% | 1.95%  | 0.09% | 0.03%  | 0.00% | 3.31%  |
| 76 | 5.216 | 6.90E-02 | 0.05%  | 0.00% | 80.42% | 7.56%  | 0.18% | 6.25%  | 3.81%  | 0.13% | 0.01%  | 0.01% | 1.60%  |
| 77 | 5.230 | 1.00E-03 | 0.00%  | 0.00% | 1.13%  | 0.10%  | 2.15% | 0.23%  | 93.62% | 2.68% | 0.00%  | 0.06% | 0.02%  |
| 78 | 5.259 | 4.80E-02 | 0.03%  | 0.00% | 91.82% | 1.63%  | 0.05% | 2.02%  | 1.50%  | 0.08% | 0.00%  | 0.00% | 2.87%  |
| 79 | 5.262 | 1.00E-03 | 0.00%  | 0.00% | 1.42%  | 0.04%  | 2.79% | 0.43%  | 90.66% | 4.47% | 0.00%  | 0.14% | 0.06%  |
| 80 | 5.270 | 0.00E+00 | 0.01%  | 0.00% | 0.31%  | 0.06%  | 4.09% | 5.10%  | 85.69% | 4.26% | 0.00%  | 0.21% | 0.27%  |

Table S11: Energy (in Ev), oscillator strength and nature of the singlet states of 1-Pt

| State | Energy | Oscillator | M <sub>0</sub> C | M <sub>1</sub> C | LC     | M <sub>0</sub> LCT | M <sub>1</sub> LCT | LLCT   | XLCT   | XMCT   | M <sub>0</sub> M <sub>1</sub> CT | M <sub>0</sub> M <sub>1</sub> CT | Other  |
|-------|--------|------------|------------------|------------------|--------|--------------------|--------------------|--------|--------|--------|----------------------------------|----------------------------------|--------|
| 1     | 1.936  | 0.00E+00   | 3.15%            | 0.00%            | 4.95%  | 76.01%             | 0.05%              | 12.23% | 0.01%  | 0.00%  | 1.86%                            | 0.00%                            | 1.75%  |
| 2     | 2.077  | 1.00E-03   | 2.88%            | 0.00%            | 4.19%  | 70.41%             | 0.05%              | 18.61% | 0.01%  | 0.00%  | 1.76%                            | 0.00%                            | 2.10%  |
| 3     | 2.262  | 1.41E-01   | 1.58%            | 0.06%            | 11.25% | 67.65%             | 1.20%              | 12.84% | 0.64%  | 0.06%  | 2.42%                            | 0.04%                            | 2.26%  |
| 4     | 2.745  | 2.00E-03   | 0.03%            | 2.55%            | 6.40%  | 0.69%              | 52.95%             | 0.23%  | 32.49% | 2.03%  | 0.03%                            | 1.15%                            | 1.46%  |
| 5     | 2.793  | 1.70E-02   | 2.81%            | 0.06%            | 4.70%  | 72.76%             | 0.63%              | 13.37% | 0.39%  | 0.03%  | 3.32%                            | 0.01%                            | 1.92%  |
| 6     | 2.914  | 1.10E-02   | 2.49%            | 0.07%            | 6.01%  | 70.25%             | 1.08%              | 15.62% | 0.08%  | 0.01%  | 2.45%                            | 0.02%                            | 1.93%  |
| 7     | 2.920  | 0.00E+00   | 2.45%            | 0.01%            | 11.29% | 77.19%             | 0.22%              | 7.23%  | 0.03%  | 0.00%  | 0.66%                            | 0.00%                            | 0.91%  |
| 8     | 2.946  | 1.00E-03   | 5.02%            | 0.00%            | 10.74% | 76.54%             | 0.04%              | 6.25%  | 0.02%  | 0.00%  | 0.22%                            | 0.00%                            | 1.16%  |
| 9     | 2.955  | 3.00E-03   | 0.03%            | 3.72%            | 3.29%  | 1.00%              | 84.07%             | 0.40%  | 3.93%  | 0.37%  | 0.05%                            | 1.83%                            | 1.31%  |
| 10    | 3.004  | 1.80E-02   | 1.27%            | 0.03%            | 8.79%  | 73.06%             | 1.38%              | 12.08% | 0.80%  | 0.05%  | 1.41%                            | 0.06%                            | 1.08%  |
| 11    | 3.049  | 2.54E-01   | 1.30%            | 0.19%            | 8.83%  | 66.50%             | 5.17%              | 12.40% | 3.05%  | 0.19%  | 1.13%                            | 0.15%                            | 1.10%  |
| 12    | 3.070  | 9.20E-02   | 2.28%            | 0.01%            | 19.16% | 72.15%             | 0.18%              | 5.03%  | 0.19%  | 0.01%  | 0.14%                            | 0.01%                            | 0.86%  |
| 13    | 3.080  | 0.00E+00   | 0.01%            | 2.37%            | 3.86%  | 0.26%              | 37.61%             | 0.08%  | 49.77% | 3.45%  | 0.00%                            | 0.83%                            | 1.75%  |
| 14    | 3.104  | 3.60E-02   | 0.19%            | 1.39%            | 9.97%  | 18.72%             | 37.79%             | 5.44%  | 22.41% | 1.46%  | 0.05%                            | 1.17%                            | 1.41%  |
| 15    | 3.126  | 3.00E-02   | 2.59%            | 0.14%            | 9.32%  | 66.34%             | 3.57%              | 13.61% | 2.65%  | 0.15%  | 0.40%                            | 0.07%                            | 1.17%  |
| 16    | 3.166  | 2.17E-01   | 4.23%            | 0.01%            | 13.67% | 69.54%             | 0.25%              | 10.28% | 0.15%  | 0.01%  | 0.30%                            | 0.01%                            | 1.55%  |
| 17    | 3.173  | 1.21E-01   | 1.98%            | 0.05%            | 12.16% | 67.19%             | 1.88%              | 13.66% | 1.35%  | 0.08%  | 0.50%                            | 0.05%                            | 1.10%  |
| 18    | 3.204  | 3.80E-02   | 1.03%            | 0.04%            | 12.15% | 71.56%             | 0.53%              | 12.98% | 0.30%  | 0.02%  | 0.62%                            | 0.02%                            | 0.76%  |
| 19    | 3.228  | 0.00E+00   | 0.06%            | 0.05%            | 1.73%  | 1.51%              | 1.48%              | 87.79% | 0.99%  | 0.06%  | 0.02%                            | 0.05%                            | 6.26%  |
| 20    | 3.277  | 3.00E-03   | 0.02%            | 0.00%            | 1.38%  | 0.96%              | 0.01%              | 91.12% | 0.01%  | 0.00%  | 0.04%                            | 0.00%                            | 6.46%  |
| 21    | 3.375  | 0.00E+00   | 0.00%            | 32.76%           | 1.24%  | 0.01%              | 13.72%             | 0.03%  | 7.66%  | 16.26% | 0.01%                            | 0.45%                            | 27.86% |
| 22    | 3.458  | 1.00E-03   | 3.21%            | 33.18%           | 1.24%  | 5.27%              | 14.00%             | 0.83%  | 2.63%  | 3.58%  | 8.51%                            | 0.47%                            | 27.10% |
| 23    | 3.496  | 1.00E-03   | 8.76%            | 12.89%           | 1.76%  | 14.17%             | 6.20%              | 2.16%  | 1.29%  | 0.58%  | 23.04%                           | 0.24%                            | 28.91% |
| 24    | 3.519  | 4.00E-03   | 0.44%            | 31.13%           | 1.18%  | 0.72%              | 11.80%             | 0.13%  | 7.17%  | 18.45% | 0.98%                            | 0.32%                            | 27.69% |
| 25    | 3.520  | 6.00E-03   | 2.46%            | 18.66%           | 4.54%  | 15.35%             | 6.92%              | 2.36%  | 2.88%  | 7.63%  | 10.10%                           | 0.22%                            | 28.88% |
| 26    | 3.559  | 2.60E-02   | 1.79%            | 5.28%            | 14.11% | 57.41%             | 2.08%              | 8.27%  | 1.03%  | 2.49%  | 0.73%                            | 0.06%                            | 6.77%  |
| 27    | 3.607  | 5.00E-03   | 10.16%           | 0.24%            | 2.27%  | 15.60%             | 5.32%              | 3.44%  | 3.59%  | 0.34%  | 27.94%                           | 0.24%                            | 30.87% |
| 28    | 3.631  | 5.60E-02   | 1.17%            | 5.23%            | 5.14%  | 2.36%              | 41.43%             | 0.79%  | 30.29% | 2.47%  | 3.00%                            | 1.82%                            | 6.31%  |
| 29    | 3.697  | 1.00E-03   | 6.99%            | 10.27%           | 2.55%  | 13.42%             | 3.96%              | 2.34%  | 1.72%  | 4.08%  | 22.10%                           | 0.10%                            | 32.48% |
| 30    | 3.727  | 0.00E+00   | 0.01%            | 0.08%            | 3.70%  | 0.02%              | 0.51%              | 0.08%  | 88.64% | 5.77%  | 0.01%                            | 0.01%                            | 1.18%  |
| 31    | 3.793  | 3.00E-03   | 0.03%            | 0.86%            | 6.98%  | 0.36%              | 49.11%             | 0.55%  | 38.51% | 1.65%  | 0.01%                            | 1.34%                            | 0.60%  |

|    |       |          |        |       |        |        |        |        |        |        |       |       |        |
|----|-------|----------|--------|-------|--------|--------|--------|--------|--------|--------|-------|-------|--------|
| 32 | 3.830 | 2.00E-03 | 1.08%  | 0.00% | 16.79% | 75.14% | 0.08%  | 4.94%  | 0.03%  | 0.00%  | 0.86% | 0.00% | 1.06%  |
| 33 | 3.857 | 3.00E-03 | 0.01%  | 2.64% | 3.18%  | 0.07%  | 84.81% | 0.17%  | 4.16%  | 0.40%  | 0.00% | 3.96% | 0.59%  |
| 34 | 3.940 | 0.00E+00 | 0.00%  | 1.24% | 3.72%  | 0.02%  | 37.59% | 0.17%  | 50.99% | 3.93%  | 0.00% | 1.71% | 0.63%  |
| 35 | 3.974 | 3.00E-03 | 44.96% | 0.15% | 4.43%  | 29.60% | 0.69%  | 2.85%  | 0.41%  | 0.08%  | 3.99% | 0.02% | 12.83% |
| 36 | 3.980 | 3.30E-02 | 5.29%  | 0.01% | 18.99% | 65.73% | 0.36%  | 4.50%  | 0.19%  | 0.01%  | 1.94% | 0.01% | 2.98%  |
| 37 | 3.986 | 2.35E-01 | 1.02%  | 1.89% | 7.30%  | 1.81%  | 46.36% | 4.52%  | 32.15% | 1.97%  | 0.04% | 1.22% | 1.72%  |
| 38 | 4.006 | 1.00E-03 | 0.39%  | 0.07% | 18.88% | 12.48% | 1.69%  | 60.64% | 1.27%  | 0.09%  | 0.09% | 0.05% | 4.35%  |
| 39 | 4.012 | 6.00E-03 | 32.29% | 0.16% | 6.00%  | 27.47% | 7.03%  | 2.94%  | 3.90%  | 0.11%  | 6.83% | 0.11% | 13.17% |
| 40 | 4.016 | 6.80E-02 | 4.11%  | 0.74% | 10.27% | 5.32%  | 47.70% | 1.02%  | 26.53% | 0.67%  | 0.80% | 0.65% | 2.20%  |
| 41 | 4.025 | 1.00E-03 | 0.03%  | 0.97% | 3.28%  | 0.25%  | 86.57% | 0.12%  | 7.10%  | 0.19%  | 0.02% | 1.15% | 0.33%  |
| 42 | 4.035 | 0.00E+00 | 3.45%  | 0.06% | 12.75% | 71.73% | 1.48%  | 8.47%  | 1.00%  | 0.06%  | 0.07% | 0.04% | 0.89%  |
| 43 | 4.044 | 8.00E-03 | 0.91%  | 0.03% | 18.93% | 50.03% | 0.70%  | 25.55% | 0.48%  | 0.03%  | 0.06% | 0.02% | 3.24%  |
| 44 | 4.059 | 4.70E-02 | 0.20%  | 0.00% | 8.60%  | 2.76%  | 0.06%  | 82.12% | 0.06%  | 0.01%  | 0.07% | 0.00% | 6.12%  |
| 45 | 4.106 | 0.00E+00 | 0.04%  | 0.59% | 4.65%  | 0.08%  | 44.32% | 0.05%  | 47.84% | 1.34%  | 0.02% | 0.59% | 0.48%  |
| 46 | 4.111 | 9.00E-03 | 42.22% | 0.01% | 4.46%  | 25.44% | 0.07%  | 4.56%  | 0.08%  | 0.02%  | 5.94% | 0.02% | 17.20% |
| 47 | 4.141 | 1.40E-02 | 2.45%  | 0.01% | 14.89% | 75.51% | 0.06%  | 5.83%  | 0.04%  | 0.01%  | 0.25% | 0.00% | 0.95%  |
| 48 | 4.143 | 5.00E-03 | 0.05%  | 0.08% | 0.66%  | 0.25%  | 49.34% | 7.02%  | 40.10% | 1.01%  | 0.01% | 1.23% | 0.27%  |
| 49 | 4.165 | 9.80E-02 | 1.02%  | 0.00% | 20.85% | 69.74% | 0.31%  | 6.93%  | 0.23%  | 0.01%  | 0.09% | 0.01% | 0.82%  |
| 50 | 4.167 | 4.70E-02 | 0.78%  | 0.00% | 40.68% | 51.89% | 0.14%  | 4.87%  | 0.08%  | 0.00%  | 0.04% | 0.00% | 1.52%  |
| 51 | 4.177 | 2.13E-01 | 1.18%  | 0.00% | 39.41% | 46.82% | 0.27%  | 9.32%  | 0.19%  | 0.00%  | 0.17% | 0.01% | 2.64%  |
| 52 | 4.214 | 0.00E+00 | 0.00%  | 0.00% | 0.97%  | 0.02%  | 47.64% | 6.37%  | 40.20% | 2.04%  | 0.00% | 2.41% | 0.36%  |
| 53 | 4.229 | 7.00E-03 | 0.10%  | 0.00% | 1.74%  | 3.58%  | 0.17%  | 91.47% | 0.11%  | 0.00%  | 0.01% | 0.00% | 2.82%  |
| 54 | 4.235 | 1.35E-01 | 0.94%  | 0.00% | 50.77% | 38.87% | 0.78%  | 5.94%  | 0.55%  | 0.02%  | 0.05% | 0.02% | 2.06%  |
| 55 | 4.257 | 1.97E-01 | 0.63%  | 0.00% | 52.34% | 37.39% | 0.34%  | 7.02%  | 0.22%  | 0.00%  | 0.03% | 0.01% | 2.03%  |
| 56 | 4.271 | 1.44E-01 | 0.65%  | 0.00% | 67.14% | 23.39% | 0.28%  | 5.39%  | 0.19%  | 0.01%  | 0.03% | 0.02% | 2.91%  |
| 57 | 4.277 | 2.30E-02 | 0.19%  | 0.00% | 13.94% | 5.65%  | 0.12%  | 76.41% | 0.11%  | 0.01%  | 0.02% | 0.00% | 3.56%  |
| 58 | 4.283 | 1.40E-02 | 2.15%  | 0.00% | 35.94% | 39.39% | 0.45%  | 19.54% | 0.32%  | 0.01%  | 0.12% | 0.01% | 2.08%  |
| 59 | 4.287 | 2.00E-02 | 2.75%  | 0.00% | 32.51% | 48.43% | 0.61%  | 13.12% | 0.43%  | 0.01%  | 0.14% | 0.01% | 2.00%  |
| 60 | 4.356 | 5.00E-03 | 0.03%  | 0.08% | 1.36%  | 1.12%  | 50.66% | 9.49%  | 34.80% | 0.87%  | 0.00% | 1.25% | 0.35%  |
| 61 | 4.373 | 4.21E-01 | 1.63%  | 0.00% | 46.25% | 44.04% | 0.18%  | 5.46%  | 0.13%  | 0.01%  | 0.07% | 0.01% | 2.22%  |
| 62 | 4.374 | 1.15E+00 | 1.21%  | 0.00% | 40.79% | 51.07% | 0.48%  | 4.47%  | 0.29%  | 0.02%  | 0.03% | 0.02% | 1.63%  |
| 63 | 4.426 | 2.00E-02 | 0.07%  | 0.00% | 1.35%  | 1.03%  | 49.66% | 9.27%  | 33.82% | 1.72%  | 0.00% | 2.52% | 0.55%  |
| 64 | 4.450 | 1.00E-03 | 0.01%  | 0.06% | 0.11%  | 0.05%  | 76.42% | 2.90%  | 18.10% | 0.45%  | 0.00% | 1.80% | 0.11%  |
| 65 | 4.492 | 3.08E-01 | 0.02%  | 0.11% | 26.52% | 0.20%  | 29.97% | 6.04%  | 32.64% | 1.26%  | 0.00% | 0.74% | 2.52%  |
| 66 | 4.495 | 3.52E-01 | 0.02%  | 0.25% | 29.64% | 0.23%  | 28.39% | 6.38%  | 30.26% | 1.26%  | 0.00% | 0.68% | 2.89%  |
| 67 | 4.520 | 1.00E-03 | 0.19%  | 0.00% | 0.32%  | 1.12%  | 73.89% | 2.91%  | 16.73% | 0.87%  | 0.01% | 3.75% | 0.22%  |
| 68 | 4.531 | 4.30E-02 | 6.27%  | 0.01% | 13.70% | 60.79% | 1.45%  | 10.35% | 1.75%  | 1.56%  | 0.37% | 0.06% | 3.69%  |
| 69 | 4.548 | 1.00E-03 | 0.00%  | 0.04% | 3.37%  | 0.06%  | 2.99%  | 0.34%  | 83.14% | 8.34%  | 0.00% | 0.12% | 1.60%  |
| 70 | 4.564 | 0.00E+00 | 0.22%  | 0.00% | 0.17%  | 0.30%  | 49.96% | 4.44%  | 40.06% | 2.07%  | 0.00% | 2.51% | 0.29%  |
| 71 | 4.569 | 1.00E-03 | 44.74% | 0.00% | 5.64%  | 30.83% | 0.21%  | 4.74%  | 0.25%  | 0.03%  | 0.86% | 0.04% | 12.67% |
| 72 | 4.574 | 4.00E-03 | 45.29% | 0.00% | 5.05%  | 31.00% | 0.10%  | 4.41%  | 0.08%  | 0.03%  | 1.40% | 0.02% | 12.62% |
| 73 | 4.583 | 1.80E-02 | 0.38%  | 0.24% | 1.32%  | 1.98%  | 0.30%  | 0.59%  | 20.89% | 48.01% | 0.02% | 0.01% | 26.26% |
| 74 | 4.608 | 0.00E+00 | 0.44%  | 0.00% | 2.53%  | 0.94%  | 0.03%  | 89.05% | 0.25%  | 0.18%  | 0.01% | 0.00% | 6.58%  |
| 75 | 4.649 | 5.00E-03 | 0.11%  | 0.17% | 4.24%  | 1.12%  | 3.86%  | 69.54% | 8.68%  | 0.55%  | 0.04% | 0.10% | 11.58% |
| 76 | 4.650 | 2.00E-03 | 0.79%  | 0.02% | 1.63%  | 0.81%  | 0.35%  | 24.02% | 0.79%  | 0.05%  | 0.20% | 0.01% | 71.32% |
| 77 | 4.670 | 1.00E-03 | 24.71% | 0.01% | 6.18%  | 19.60% | 0.11%  | 35.87% | 0.38%  | 0.15%  | 0.85% | 0.02% | 12.13% |
| 78 | 4.705 | 7.00E-03 | 0.01%  | 0.00% | 1.15%  | 0.25%  | 0.01%  | 19.19% | 0.01%  | 0.01%  | 0.62% | 0.00% | 78.76% |
| 79 | 4.711 | 3.00E-03 | 16.73% | 0.00% | 6.76%  | 19.42% | 0.13%  | 47.35% | 0.38%  | 0.03%  | 0.36% | 0.01% | 8.82%  |
| 80 | 4.726 | 3.70E-02 | 0.13%  | 0.24% | 10.63% | 1.27%  | 5.10%  | 67.21% | 9.06%  | 0.56%  | 0.03% | 0.11% | 5.67%  |

Table S12: Energy (in Ev), oscillator strength and nature of the singlet states of 1-Au(I)

| State | Energy | Oscillator | M <sub>0</sub> C | M <sub>1</sub> C | LC     | M <sub>0</sub> LCT | M <sub>1</sub> LCT | LLCT   | XLCT   | XMCT  | M <sub>0</sub> M <sub>1</sub> CT | M <sub>1</sub> M <sub>0</sub> CT | Other  |
|-------|--------|------------|------------------|------------------|--------|--------------------|--------------------|--------|--------|-------|----------------------------------|----------------------------------|--------|
| 1     | 2.166  | 0.00E+00   | 3.35%            | 0.00%            | 5.47%  | 77.10%             | 0.06%              | 11.86% | 0.02%  | 0.00% | 1.04%                            | 0.00%                            | 1.10%  |
| 2     | 2.323  | 2.00E-03   | 2.76%            | 0.00%            | 4.89%  | 69.83%             | 0.07%              | 20.03% | 0.03%  | 0.00% | 0.94%                            | 0.00%                            | 1.45%  |
| 3     | 2.500  | 1.45E-01   | 1.63%            | 0.02%            | 12.09% | 70.35%             | 0.38%              | 12.87% | 0.13%  | 0.01% | 1.24%                            | 0.01%                            | 1.28%  |
| 4     | 2.806  | 2.10E-02   | 2.24%            | 0.01%            | 6.87%  | 77.46%             | 0.13%              | 11.18% | 0.04%  | 0.00% | 1.18%                            | 0.00%                            | 0.90%  |
| 5     | 2.824  | 1.00E-03   | 2.72%            | 0.00%            | 12.27% | 78.23%             | 0.04%              | 6.03%  | 0.02%  | 0.00% | 0.07%                            | 0.00%                            | 0.63%  |
| 6     | 2.848  | 2.00E-03   | 4.66%            | 0.00%            | 10.56% | 77.33%             | 0.05%              | 6.21%  | 0.02%  | 0.00% | 0.17%                            | 0.00%                            | 1.01%  |
| 7     | 2.953  | 4.00E-03   | 1.66%            | 0.25%            | 11.21% | 55.26%             | 11.57%             | 15.19% | 2.13%  | 0.09% | 1.01%                            | 0.26%                            | 1.39%  |
| 8     | 2.961  | 3.00E-03   | 0.35%            | 0.87%            | 24.23% | 15.72%             | 42.85%             | 4.97%  | 7.81%  | 0.36% | 0.31%                            | 1.05%                            | 1.49%  |
| 9     | 2.980  | 1.05E-01   | 1.97%            | 0.00%            | 20.23% | 71.23%             | 0.11%              | 5.69%  | 0.03%  | 0.00% | 0.01%                            | 0.00%                            | 0.72%  |
| 10    | 3.020  | 4.70E-02   | 0.96%            | 0.00%            | 13.51% | 72.20%             | 0.14%              | 12.43% | 0.03%  | 0.00% | 0.28%                            | 0.00%                            | 0.46%  |
| 11    | 3.070  | 2.06E-01   | 4.17%            | 0.00%            | 14.54% | 69.71%             | 0.09%              | 9.51%  | 0.03%  | 0.00% | 0.41%                            | 0.01%                            | 1.54%  |
| 12    | 3.083  | 1.37E-01   | 4.02%            | 0.00%            | 13.97% | 70.03%             | 0.11%              | 10.27% | 0.03%  | 0.00% | 0.19%                            | 0.01%                            | 1.37%  |
| 13    | 3.236  | 5.70E-02   | 2.04%            | 0.00%            | 9.00%  | 76.07%             | 0.08%              | 11.88% | 0.02%  | 0.00% | 0.23%                            | 0.00%                            | 0.71%  |
| 14    | 3.378  | 2.60E-02   | 0.99%            | 0.00%            | 7.82%  | 71.68%             | 0.11%              | 18.72% | 0.04%  | 0.00% | 0.15%                            | 0.00%                            | 0.49%  |
| 15    | 3.443  | 4.80E-02   | 1.11%            | 0.00%            | 10.95% | 73.31%             | 0.17%              | 13.86% | 0.04%  | 0.00% | 0.10%                            | 0.00%                            | 0.46%  |
| 16    | 3.555  | 8.00E-02   | 1.13%            | 0.01%            | 10.98% | 55.76%             | 0.36%              | 29.81% | 0.07%  | 0.00% | 0.11%                            | 0.02%                            | 1.76%  |
| 17    | 3.583  | 3.00E-02   | 0.38%            | 0.02%            | 4.77%  | 15.75%             | 0.75%              | 74.03% | 0.47%  | 0.03% | 0.02%                            | 0.03%                            | 3.77%  |
| 18    | 3.613  | 2.00E-03   | 0.04%            | 1.03%            | 25.21% | 1.31%              | 57.92%             | 1.50%  | 9.14%  | 0.49% | 0.01%                            | 1.86%                            | 1.51%  |
| 19    | 3.628  | 5.00E-03   | 0.05%            | 0.01%            | 2.09%  | 1.01%              | 0.19%              | 91.92% | 0.16%  | 0.01% | 0.01%                            | 0.01%                            | 4.56%  |
| 20    | 3.683  | 1.00E-03   | 0.00%            | 1.25%            | 3.23%  | 0.03%              | 52.34%             | 0.07%  | 39.59% | 1.82% | 0.00%                            | 1.28%                            | 0.39%  |
| 21    | 3.708  | 7.60E-02   | 0.06%            | 1.17%            | 5.78%  | 1.65%              | 40.05%             | 1.34%  | 45.98% | 2.17% | 0.01%                            | 1.07%                            | 0.72%  |
| 22    | 3.742  | 4.00E-03   | 1.73%            | 0.01%            | 14.73% | 75.38%             | 0.53%              | 6.30%  | 0.59%  | 0.03% | 0.13%                            | 0.01%                            | 0.56%  |
| 23    | 3.892  | 3.90E-02   | 7.76%            | 0.00%            | 18.18% | 66.26%             | 0.04%              | 5.60%  | 0.02%  | 0.00% | 0.23%                            | 0.00%                            | 1.89%  |
| 24    | 3.925  | 4.00E-03   | 13.62%           | 0.00%            | 12.64% | 64.10%             | 0.08%              | 6.38%  | 0.03%  | 0.00% | 0.24%                            | 0.01%                            | 2.92%  |
| 25    | 3.937  | 4.00E-03   | 34.02%           | 0.00%            | 9.33%  | 44.35%             | 0.07%              | 4.07%  | 0.02%  | 0.01% | 0.57%                            | 0.02%                            | 7.56%  |
| 26    | 3.957  | 6.00E-03   | 21.16%           | 0.00%            | 14.17% | 53.29%             | 0.09%              | 6.12%  | 0.03%  | 0.00% | 0.23%                            | 0.01%                            | 4.90%  |
| 27    | 3.967  | 8.00E-03   | 28.82%           | 0.00%            | 9.92%  | 48.73%             | 0.17%              | 5.74%  | 0.04%  | 0.00% | 0.22%                            | 0.01%                            | 6.35%  |
| 28    | 4.011  | 1.00E-03   | 0.05%            | 0.15%            | 34.44% | 1.17%              | 51.11%             | 2.31%  | 9.37%  | 0.15% | 0.00%                            | 0.63%                            | 0.63%  |
| 29    | 4.040  | 4.00E-03   | 6.49%            | 0.00%            | 14.18% | 70.18%             | 0.44%              | 6.66%  | 0.11%  | 0.00% | 0.11%                            | 0.02%                            | 1.82%  |
| 30    | 4.055  | 3.30E-02   | 0.41%            | 0.02%            | 7.88%  | 41.19%             | 27.62%             | 15.69% | 5.68%  | 0.15% | 0.01%                            | 0.80%                            | 0.55%  |
| 31    | 4.055  | 3.80E-02   | 0.90%            | 0.02%            | 7.78%  | 39.35%             | 28.33%             | 16.05% | 5.82%  | 0.17% | 0.02%                            | 0.84%                            | 0.74%  |
| 32    | 4.078  | 7.00E-03   | 45.18%           | 0.00%            | 5.87%  | 32.02%             | 0.29%              | 4.09%  | 0.06%  | 0.01% | 0.44%                            | 0.03%                            | 12.01% |
| 33    | 4.085  | 4.00E-03   | 2.33%            | 0.00%            | 28.68% | 61.41%             | 0.21%              | 6.32%  | 0.06%  | 0.00% | 0.03%                            | 0.01%                            | 0.95%  |
| 34    | 4.106  | 8.30E-02   | 1.74%            | 0.00%            | 28.65% | 52.09%             | 0.61%              | 15.51% | 0.16%  | 0.01% | 0.05%                            | 0.02%                            | 1.17%  |
| 35    | 4.132  | 1.00E-03   | 0.18%            | 0.01%            | 0.89%  | 0.94%              | 56.23%             | 24.78% | 11.88% | 0.65% | 0.00%                            | 3.03%                            | 1.42%  |
| 36    | 4.138  | 3.90E-02   | 0.46%            | 0.00%            | 17.85% | 18.70%             | 0.08%              | 60.35% | 0.03%  | 0.00% | 0.01%                            | 0.00%                            | 2.51%  |
| 37    | 4.158  | 7.00E-03   | 0.03%            | 1.90%            | 11.72% | 0.54%              | 76.23%             | 0.71%  | 6.10%  | 0.31% | 0.00%                            | 1.73%                            | 0.74%  |
| 38    | 4.162  | 1.58E-01   | 1.16%            | 0.01%            | 34.27% | 52.33%             | 0.54%              | 10.66% | 0.07%  | 0.00% | 0.03%                            | 0.01%                            | 0.91%  |
| 39    | 4.182  | 1.00E-02   | 3.64%            | 0.00%            | 13.40% | 69.24%             | 0.26%              | 12.17% | 0.09%  | 0.00% | 0.03%                            | 0.01%                            | 1.18%  |



|    |       |          |        |        |        |        |        |        |        |       |        |       |        |
|----|-------|----------|--------|--------|--------|--------|--------|--------|--------|-------|--------|-------|--------|
| 40 | 4.190 | 5.00E-02 | 0.92%  | 0.00%  | 26.78% | 42.83% | 0.10%  | 26.51% | 0.03%  | 0.00% | 0.02%  | 0.00% | 2.82%  |
| 41 | 4.228 | 7.50E-02 | 0.56%  | 0.03%  | 14.71% | 17.62% | 0.85%  | 62.54% | 0.81%  | 0.04% | 0.01%  | 0.03% | 2.82%  |
| 42 | 4.257 | 1.05E-01 | 0.59%  | 0.00%  | 67.02% | 15.99% | 0.11%  | 12.62% | 0.08%  | 0.01% | 0.01%  | 0.01% | 3.56%  |
| 43 | 4.280 | 6.00E-03 | 0.05%  | 0.02%  | 84.46% | 0.94%  | 0.88%  | 7.96%  | 0.98%  | 0.05% | 0.00%  | 0.03% | 4.63%  |
| 44 | 4.284 | 1.00E-03 | 0.00%  | 0.76%  | 3.00%  | 0.03%  | 50.89% | 0.18%  | 41.09% | 2.02% | 0.00%  | 1.78% | 0.26%  |
| 45 | 4.288 | 9.00E-03 | 0.01%  | 2.48%  | 2.60%  | 0.10%  | 92.09% | 0.13%  | 0.16%  | 0.02% | 0.00%  | 1.98% | 0.44%  |
| 46 | 4.291 | 8.40E-02 | 0.02%  | 1.21%  | 7.57%  | 0.47%  | 40.01% | 2.71%  | 43.75% | 2.10% | 0.00%  | 1.26% | 0.90%  |
| 47 | 4.323 | 1.58E+00 | 0.76%  | 0.00%  | 61.53% | 25.70% | 0.07%  | 8.39%  | 0.06%  | 0.00% | 0.01%  | 0.00% | 3.47%  |
| 48 | 4.339 | 3.90E-01 | 0.52%  | 0.00%  | 76.45% | 14.43% | 0.04%  | 4.18%  | 0.02%  | 0.00% | 0.01%  | 0.00% | 4.36%  |
| 49 | 4.492 | 2.30E-02 | 8.43%  | 0.03%  | 14.01% | 61.79% | 0.49%  | 10.18% | 0.30%  | 0.03% | 0.76%  | 0.06% | 3.93%  |
| 50 | 4.516 | 3.00E-03 | 42.84% | 0.01%  | 5.21%  | 30.50% | 0.11%  | 4.04%  | 0.03%  | 0.01% | 3.70%  | 0.02% | 13.53% |
| 51 | 4.573 | 3.00E-03 | 43.13% | 0.01%  | 5.59%  | 29.42% | 0.75%  | 7.46%  | 0.84%  | 0.03% | 0.88%  | 0.05% | 11.84% |
| 52 | 4.596 | 9.00E-03 | 1.47%  | 0.00%  | 4.35%  | 2.29%  | 0.48%  | 88.71% | 0.61%  | 0.02% | 0.04%  | 0.02% | 2.00%  |
| 53 | 4.606 | 2.00E-03 | 1.05%  | 0.02%  | 0.88%  | 1.39%  | 36.41% | 7.34%  | 50.22% | 1.26% | 0.03%  | 0.93% | 0.48%  |
| 54 | 4.674 | 2.10E-02 | 1.92%  | 0.01%  | 6.28%  | 2.25%  | 0.28%  | 86.60% | 0.33%  | 0.02% | 0.07%  | 0.02% | 2.22%  |
| 55 | 4.676 | 3.00E-03 | 0.00%  | 0.02%  | 0.49%  | 0.02%  | 47.01% | 2.25%  | 47.79% | 1.13% | 0.00%  | 1.19% | 0.10%  |
| 56 | 4.683 | 5.10E-02 | 4.14%  | 0.05%  | 5.66%  | 3.39%  | 30.58% | 7.28%  | 42.77% | 2.34% | 0.18%  | 1.66% | 1.96%  |
| 57 | 4.687 | 5.91E-01 | 6.05%  | 0.52%  | 54.97% | 5.91%  | 7.97%  | 7.20%  | 10.55% | 0.56% | 0.26%  | 0.38% | 5.64%  |
| 58 | 4.688 | 1.88E-01 | 29.69% | 0.14%  | 21.70% | 21.36% | 2.25%  | 9.52%  | 2.92%  | 0.16% | 1.29%  | 0.10% | 10.87% |
| 59 | 4.737 | 1.40E-02 | 0.14%  | 1.37%  | 38.50% | 1.37%  | 41.65% | 6.37%  | 7.20%  | 0.41% | 0.05%  | 0.59% | 2.37%  |
| 60 | 4.753 | 0.00E+00 | 0.01%  | 0.00%  | 0.04%  | 0.02%  | 47.31% | 2.30%  | 45.09% | 2.48% | 0.00%  | 2.61% | 0.13%  |
| 61 | 4.755 | 3.60E-02 | 0.01%  | 0.20%  | 9.12%  | 0.44%  | 40.52% | 1.20%  | 46.55% | 0.98% | 0.01%  | 0.66% | 0.31%  |
| 62 | 4.807 | 1.00E-03 | 0.00%  | 0.22%  | 2.86%  | 0.02%  | 52.54% | 0.16%  | 42.26% | 0.89% | 0.00%  | 0.97% | 0.08%  |
| 63 | 4.818 | 3.00E-03 | 0.03%  | 0.54%  | 15.34% | 0.60%  | 70.63% | 2.97%  | 5.68%  | 0.25% | 0.02%  | 3.20% | 0.74%  |
| 64 | 4.869 | 1.00E-03 | 1.68%  | 0.02%  | 6.56%  | 63.71% | 2.12%  | 18.04% | 0.69%  | 0.02% | 3.94%  | 0.06% | 3.17%  |
| 65 | 4.889 | 0.00E+00 | 0.10%  | 0.19%  | 1.60%  | 2.21%  | 56.49% | 24.29% | 12.85% | 0.21% | 0.51%  | 0.73% | 0.81%  |
| 66 | 4.900 | 8.00E-03 | 0.07%  | 1.20%  | 8.60%  | 4.06%  | 19.64% | 1.94%  | 0.64%  | 0.05% | 0.20%  | 2.91% | 0.69%  |
| 67 | 4.923 | 2.00E-03 | 3.20%  | 0.17%  | 2.19%  | 24.25% | 0.64%  | 7.38%  | 0.12%  | 0.07% | 38.83% | 0.03% | 23.11% |
| 68 | 4.947 | 1.20E-02 | 0.61%  | 0.21%  | 8.88%  | 20.68% | 2.40%  | 60.75% | 0.29%  | 0.07% | 1.77%  | 0.10% | 4.25%  |
| 69 | 4.952 | 2.10E-02 | 0.80%  | 0.65%  | 10.75% | 38.96% | 6.14%  | 38.39% | 0.59%  | 0.20% | 0.57%  | 0.25% | 2.71%  |
| 70 | 4.970 | 3.90E-02 | 1.40%  | 0.57%  | 11.24% | 55.92% | 3.31%  | 20.67% | 0.56%  | 0.18% | 2.84%  | 0.12% | 3.19%  |
| 71 | 5.009 | 1.20E-02 | 0.13%  | 1.24%  | 5.65%  | 6.03%  | 0.78%  | 78.98% | 0.89%  | 0.38% | 0.54%  | 0.03% | 5.33%  |
| 72 | 5.035 | 2.70E-02 | 1.07%  | 2.70%  | 15.00% | 7.84%  | 2.75%  | 38.37% | 1.11%  | 0.90% | 14.91% | 0.08% | 15.27% |
| 73 | 5.038 | 1.50E-02 | 1.04%  | 3.37%  | 44.54% | 7.92%  | 3.09%  | 14.66% | 1.09%  | 1.15% | 10.83% | 0.14% | 12.16% |
| 74 | 5.046 | 3.00E-02 | 0.69%  | 1.48%  | 47.44% | 5.73%  | 1.37%  | 29.77% | 0.98%  | 0.56% | 4.77%  | 0.08% | 7.13%  |
| 75 | 5.058 | 5.00E-03 | 0.65%  | 3.42%  | 1.83%  | 4.22%  | 40.78% | 21.17% | 8.58%  | 1.18% | 8.64%  | 0.61% | 8.94%  |
| 76 | 5.060 | 4.00E-03 | 4.79%  | 0.56%  | 6.05%  | 16.38% | 2.32%  | 7.18%  | 0.64%  | 0.34% | 34.67% | 0.04% | 27.05% |
| 77 | 5.082 | 5.00E-03 | 0.47%  | 14.30% | 8.73%  | 3.99%  | 17.10% | 24.67% | 4.88%  | 4.65% | 5.05%  | 0.57% | 15.60% |
| 78 | 5.096 | 8.40E-02 | 0.10%  | 3.88%  | 64.37% | 2.88%  | 3.33%  | 16.66% | 1.10%  | 1.26% | 1.01%  | 0.15% | 5.26%  |
| 79 | 5.100 | 9.00E-03 | 0.12%  | 1.21%  | 42.55% | 5.11%  | 2.29%  | 41.88% | 1.72%  | 0.49% | 0.23%  | 0.10% | 4.29%  |
| 80 | 5.185 | 3.60E-02 | 0.17%  | 1.31%  | 46.36% | 7.79%  | 5.24%  | 31.20% | 3.37%  | 0.73% | 0.20%  | 0.17% | 3.47%  |

Table S13: Energy (in Ev), oscillator strength and nature of the singlet states of 1-Au(III)

| State | Energy | Oscillator | M <sub>0</sub> C | M <sub>1</sub> C | LC     | M <sub>0</sub> LCT | M <sub>1</sub> LCT | LLCT   | XLCT   | XMCT   | M <sub>0</sub> M <sub>1</sub> CT | M <sub>0</sub> M <sub>2</sub> CT | Other  |
|-------|--------|------------|------------------|------------------|--------|--------------------|--------------------|--------|--------|--------|----------------------------------|----------------------------------|--------|
| 1     | 1.210  | 0.00E+00   | 0.63%            | 0.01%            | 1.34%  | 17.65%             | 0.00%              | 3.16%  | 0.00%  | 0.01%  | 31.44%                           | 0.00%                            | 45.76% |
| 2     | 1.334  | 0.00E+00   | 0.64%            | 0.01%            | 0.98%  | 16.27%             | 0.01%              | 4.89%  | 0.00%  | 0.01%  | 28.96%                           | 0.00%                            | 48.24% |
| 3     | 1.349  | 1.00E-03   | 0.49%            | 0.04%            | 2.92%  | 15.95%             | 0.02%              | 3.22%  | 0.03%  | 0.06%  | 28.47%                           | 0.00%                            | 48.79% |
| 4     | 1.693  | 0.00E+00   | 3.71%            | 0.00%            | 4.88%  | 76.20%             | 0.02%              | 12.59% | 0.01%  | 0.00%  | 1.15%                            | 0.00%                            | 1.44%  |
| 5     | 1.833  | 1.00E-03   | 3.25%            | 0.00%            | 4.05%  | 70.61%             | 0.02%              | 19.19% | 0.01%  | 0.00%  | 1.09%                            | 0.00%                            | 1.77%  |
| 6     | 2.082  | 1.07E-01   | 1.67%            | 0.01%            | 11.91% | 68.93%             | 0.07%              | 13.87% | 0.12%  | 0.06%  | 1.53%                            | 0.00%                            | 1.83%  |
| 7     | 2.165  | 0.00E+00   | 0.01%            | 0.00%            | 0.23%  | 0.15%              | 0.00%              | 21.78% | 0.00%  | 0.01%  | 0.27%                            | 0.00%                            | 77.55% |
| 8     | 2.222  | 0.00E+00   | 0.02%            | 0.00%            | 0.24%  | 0.31%              | 0.00%              | 21.69% | 0.00%  | 0.00%  | 0.54%                            | 0.00%                            | 77.20% |
| 9     | 2.584  | 1.90E-02   | 3.63%            | 0.01%            | 4.79%  | 74.86%             | 0.03%              | 13.21% | 0.03%  | 0.02%  | 1.94%                            | 0.00%                            | 1.49%  |
| 10    | 2.638  | 0.00E+00   | 0.00%            | 4.81%            | 0.73%  | 0.01%              | 2.68%              | 0.02%  | 18.74% | 33.87% | 0.01%                            | 0.05%                            | 39.08% |
| 11    | 2.711  | 9.00E-03   | 3.29%            | 0.02%            | 4.41%  | 69.78%             | 0.02%              | 18.71% | 0.05%  | 0.07%  | 1.77%                            | 0.00%                            | 1.89%  |
| 12    | 2.802  | 2.00E-03   | 0.01%            | 7.91%            | 0.79%  | 0.22%              | 4.29%              | 0.06%  | 16.85% | 30.98% | 0.01%                            | 0.06%                            | 38.83% |
| 13    | 2.815  | 2.60E-02   | 0.02%            | 0.28%            | 0.87%  | 0.91%              | 0.15%              | 0.55%  | 20.54% | 37.92% | 0.01%                            | 0.00%                            | 38.76% |
| 14    | 2.830  | 2.00E-03   | 1.95%            | 0.00%            | 6.93%  | 74.40%             | 0.03%              | 14.30% | 0.20%  | 0.30%  | 0.66%                            | 0.00%                            | 1.23%  |
| 15    | 2.858  | 0.00E+00   | 0.00%            | 0.00%            | 1.36%  | 1.08%              | 0.00%              | 91.78% | 0.07%  | 0.13%  | 0.04%                            | 0.00%                            | 5.53%  |
| 16    | 2.912  | 2.00E-03   | 0.03%            | 0.00%            | 1.31%  | 1.22%              | 0.00%              | 92.00% | 0.00%  | 0.00%  | 0.03%                            | 0.00%                            | 5.40%  |
| 17    | 2.913  | 0.00E+00   | 0.02%            | 7.25%            | 0.86%  | 0.56%              | 3.94%              | 0.22%  | 16.90% | 30.95% | 0.08%                            | 0.06%                            | 39.17% |
| 18    | 2.922  | 3.80E-02   | 2.02%            | 0.05%            | 6.18%  | 70.81%             | 0.06%              | 18.65% | 0.17%  | 0.27%  | 0.49%                            | 0.00%                            | 1.29%  |
| 19    | 3.039  | 6.40E-02   | 1.54%            | 0.00%            | 12.89% | 73.86%             | 0.03%              | 10.89% | 0.03%  | 0.01%  | 0.16%                            | 0.00%                            | 0.60%  |
| 20    | 3.042  | 3.57E-01   | 1.55%            | 0.01%            | 10.32% | 72.34%             | 0.02%              | 14.14% | 0.09%  | 0.11%  | 0.44%                            | 0.00%                            | 0.99%  |
| 21    | 3.049  | 2.30E-02   | 1.75%            | 0.00%            | 12.97% | 76.21%             | 0.02%              | 8.35%  | 0.02%  | 0.00%  | 0.10%                            | 0.00%                            | 0.56%  |
| 22    | 3.082  | 1.80E-02   | 4.47%            | 0.00%            | 12.26% | 76.72%             | 0.02%              | 5.53%  | 0.02%  | 0.01%  | 0.02%                            | 0.00%                            | 0.97%  |
| 23    | 3.202  | 1.55E-01   | 1.73%            | 0.00%            | 21.72% | 71.21%             | 0.02%              | 4.68%  | 0.02%  | 0.00%  | 0.01%                            | 0.00%                            | 0.61%  |
| 24    | 3.272  | 5.00E-03   | 2.63%            | 0.00%            | 16.27% | 70.16%             | 0.04%              | 9.93%  | 0.06%  | 0.00%  | 0.02%                            | 0.00%                            | 0.89%  |
| 25    | 3.311  | 1.13E-01   | 3.96%            | 0.00%            | 13.92% | 68.68%             | 0.04%              | 11.13% | 0.05%  | 0.02%  | 0.01%                            | 0.00%                            | 2.19%  |
| 26    | 3.321  | 1.00E-03   | 0.04%            | 0.07%            | 19.64% | 0.88%              | 0.04%              | 1.80%  | 0.66%  | 1.19%  | 0.15%                            | 0.00%                            | 75.54% |
| 27    | 3.561  | 4.00E-03   | 0.00%            | 0.00%            | 0.35%  | 0.09%              | 0.00%              | 21.73% | 0.02%  | 0.03%  | 0.14%                            | 0.00%                            | 77.64% |
| 28    | 3.609  | 3.00E-03   | 2.45%            | 0.00%            | 16.56% | 60.22%             | 0.02%              | 18.37% | 0.02%  | 0.01%  | 0.09%                            | 0.00%                            | 2.28%  |
| 29    | 3.631  | 0.00E+00   | 0.04%            | 0.01%            | 0.64%  | 0.22%              | 0.01%              | 21.29% | 0.02%  | 0.03%  | 0.37%                            | 0.00%                            | 77.37% |
| 30    | 3.679  | 6.00E-03   | 0.06%            | 0.01%            | 0.89%  | 0.53%              | 0.01%              | 20.74% | 0.04%  | 0.06%  | 0.90%                            | 0.00%                            | 76.76% |
| 31    | 3.709  | 2.00E-03   | 0.38%            | 0.00%            | 4.83%  | 8.66%              | 0.01%              | 79.89% | 0.01%  | 0.00%  | 0.04%                            | 0.00%                            | 6.18%  |
| 32    | 3.739  | 0.00E+00   | 0.56%            | 0.09%            | 1.42%  | 1.30%              | 0.05%              | 20.62% | 0.07%  | 0.11%  | 1.81%                            | 0.00%                            | 73.98% |
| 33    | 3.748  | 6.00E-03   | 0.11%            | 0.00%            | 3.23%  | 1.18%              | 0.00%              | 87.78% | 0.00%  | 0.00%  | 0.06%                            | 0.00%                            | 7.63%  |
| 34    | 3.840  | 7.00E-03   | 0.07%            | 0.02%            | 0.53%  | 0.25%              | 0.01%              | 21.33% | 0.07%  | 0.10%  | 0.40%                            | 0.00%                            | 77.23% |
| 35    | 3.875  | 0.00E+00   | 46.37%           | 0.01%            | 5.17%  | 32.66%             | 0.02%              | 3.96%  | 0.02%  | 0.01%  | 0.26%                            | 0.02%                            | 11.50% |
| 36    | 3.924  | 1.00E-03   | 0.18%            | 0.00%            | 0.94%  | 0.80%              | 0.00%              | 95.97% | 0.01%  | 0.00%  | 0.00%                            | 0.00%                            | 2.09%  |
| 37    | 3.949  | 0.00E+00   | 52.85%           | 0.00%            | 4.15%  | 29.16%             | 0.01%              | 2.54%  | 0.03%  | 0.01%  | 0.11%                            | 0.01%                            | 11.15% |
| 38    | 3.963  | 3.00E-03   | 7.30%            | 0.00%            | 18.56% | 65.91%             | 0.02%              | 5.53%  | 0.01%  | 0.00%  | 0.06%                            | 0.00%                            | 2.61%  |
| 39    | 3.979  | 7.00E-03   | 0.02%            | 0.00%            | 0.75%  | 1.17%              | 0.00%              | 96.14% | 0.01%  | 0.00%  | 0.00%                            | 0.00%                            | 1.91%  |
| 40    | 3.990  | 2.30E-02   | 0.08%            | 2.51%            | 5.72%  | 0.09%              | 10.79%             | 0.28%  | 72.39% | 3.97%  | 0.01%                            | 0.27%                            | 3.90%  |
| 41    | 4.057  | 2.00E-03   | 39.87%           | 0.04%            | 4.07%  | 25.36%             | 0.05%              | 6.60%  | 0.25%  | 0.03%  | 0.52%                            | 0.01%                            | 23.20% |
| 42    | 4.057  | 1.00E-02   | 3.87%            | 0.02%            | 0.97%  | 3.61%              | 0.02%              | 18.88% | 0.11%  | 0.07%  | 2.14%                            | 0.00%                            | 70.32% |
| 43    | 4.088  | 0.00E+00   | 0.00%            | 0.02%            | 4.25%  | 0.04%              | 0.62%              | 0.91%  | 88.95% | 4.48%  | 0.00%                            | 0.02%                            | 0.73%  |
| 44    | 4.096  | 6.00E-03   | 3.53%            | 0.91%            | 4.17%  | 12.41%             | 0.57%              | 15.40% | 0.82%  | 0.07%  | 3.27%                            | 0.01%                            | 58.84% |
| 45    | 4.107  | 9.30E-02   | 0.79%            | 0.01%            | 62.31% | 30.33%             | 0.02%              | 3.76%  | 0.02%  | 0.00%  | 0.06%                            | 0.00%                            | 2.70%  |
| 46    | 4.110  | 7.60E-02   | 3.89%            | 0.13%            | 24.88% | 58.96%             | 0.09%              | 5.20%  | 0.07%  | 0.01%  | 0.39%                            | 0.00%                            | 6.39%  |
| 47    | 4.176  | 2.00E-03   | 1.96%            | 0.00%            | 14.77% | 73.03%             | 0.04%              | 9.49%  | 0.05%  | 0.00%  | 0.07%                            | 0.00%                            | 0.59%  |



|    |       |          |        |        |        |        |        |        |        |       |       |       |        |
|----|-------|----------|--------|--------|--------|--------|--------|--------|--------|-------|-------|-------|--------|
| 48 | 4.192 | 4.30E-02 | 0.03%  | 26.41% | 5.38%  | 0.45%  | 15.12% | 2.37%  | 9.26%  | 2.56% | 0.29% | 0.23% | 37.90% |
| 49 | 4.208 | 7.62E-01 | 0.88%  | 0.23%  | 73.31% | 19.65% | 0.14%  | 2.74%  | 0.07%  | 0.03% | 0.02% | 0.00% | 2.94%  |
| 50 | 4.236 | 8.30E-02 | 1.12%  | 0.00%  | 51.73% | 41.70% | 0.02%  | 3.80%  | 0.03%  | 0.00% | 0.02% | 0.00% | 1.59%  |
| 51 | 4.242 | 0.00E+00 | 0.00%  | 0.29%  | 3.40%  | 0.02%  | 13.36% | 0.17%  | 77.64% | 3.99% | 0.00% | 0.41% | 0.72%  |
| 52 | 4.247 | 8.00E-03 | 0.06%  | 0.02%  | 2.77%  | 2.51%  | 0.62%  | 85.62% | 3.11%  | 0.16% | 0.01% | 0.02% | 5.11%  |
| 53 | 4.253 | 3.10E-02 | 0.09%  | 0.00%  | 92.64% | 2.52%  | 0.00%  | 0.98%  | 0.00%  | 0.00% | 0.00% | 0.00% | 3.77%  |
| 54 | 4.256 | 9.00E-03 | 2.36%  | 0.01%  | 18.50% | 66.64% | 0.24%  | 9.96%  | 0.99%  | 0.06% | 0.05% | 0.01% | 1.19%  |
| 55 | 4.280 | 3.80E-02 | 0.49%  | 0.00%  | 61.62% | 32.40% | 0.01%  | 2.67%  | 0.02%  | 0.00% | 0.02% | 0.00% | 2.77%  |
| 56 | 4.281 | 3.10E-02 | 0.05%  | 1.03%  | 8.45%  | 1.83%  | 0.57%  | 80.93% | 0.36%  | 0.29% | 0.03% | 0.01% | 6.47%  |
| 57 | 4.295 | 1.30E-02 | 0.34%  | 0.28%  | 6.43%  | 4.12%  | 10.85% | 19.96% | 51.70% | 2.76% | 0.04% | 0.32% | 3.19%  |
| 58 | 4.300 | 7.80E-02 | 0.57%  | 0.01%  | 14.83% | 78.68% | 0.02%  | 5.65%  | 0.02%  | 0.00% | 0.01% | 0.00% | 0.22%  |
| 59 | 4.339 | 1.36E-01 | 2.85%  | 0.02%  | 28.74% | 51.00% | 0.75%  | 9.51%  | 4.22%  | 0.24% | 0.10% | 0.02% | 2.55%  |
| 60 | 4.368 | 2.30E-02 | 0.21%  | 0.06%  | 6.19%  | 8.68%  | 2.01%  | 65.58% | 11.52% | 0.64% | 0.07% | 0.06% | 4.98%  |
| 61 | 4.373 | 8.50E-02 | 0.06%  | 1.11%  | 21.08% | 2.48%  | 0.64%  | 63.95% | 0.91%  | 0.66% | 0.09% | 0.01% | 9.02%  |
| 62 | 4.378 | 2.53E-01 | 1.11%  | 0.07%  | 19.05% | 67.62% | 0.08%  | 11.07% | 0.08%  | 0.04% | 0.07% | 0.00% | 0.83%  |
| 63 | 4.406 | 3.90E-02 | 11.74% | 0.01%  | 13.25% | 61.27% | 0.04%  | 10.35% | 0.05%  | 0.01% | 0.04% | 0.00% | 3.25%  |
| 64 | 4.444 | 2.54E-01 | 0.35%  | 0.34%  | 9.61%  | 4.50%  | 0.42%  | 12.51% | 1.57%  | 0.85% | 1.60% | 0.01% | 68.22% |
| 65 | 4.448 | 1.33E-01 | 8.17%  | 0.01%  | 19.83% | 54.64% | 0.10%  | 8.53%  | 0.51%  | 0.05% | 0.23% | 0.01% | 7.92%  |
| 66 | 4.453 | 1.90E-02 | 0.10%  | 1.56%  | 10.59% | 4.22%  | 0.92%  | 28.65% | 0.98%  | 1.51% | 1.26% | 0.02% | 50.20% |
| 67 | 4.457 | 1.10E-01 | 0.16%  | 0.60%  | 18.09% | 3.47%  | 0.38%  | 4.24%  | 0.56%  | 0.60% | 0.68% | 0.01% | 71.22% |
| 68 | 4.471 | 7.76E-01 | 2.50%  | 0.07%  | 26.10% | 62.27% | 0.06%  | 5.80%  | 0.07%  | 0.09% | 0.06% | 0.00% | 2.98%  |
| 69 | 4.527 | 8.00E-03 | 9.68%  | 0.00%  | 10.14% | 57.75% | 0.04%  | 16.66% | 0.25%  | 0.02% | 0.30% | 0.00% | 5.15%  |
| 70 | 4.532 | 3.00E-03 | 0.47%  | 0.01%  | 5.06%  | 5.78%  | 0.31%  | 79.21% | 2.43%  | 0.14% | 0.10% | 0.01% | 6.48%  |
| 71 | 4.541 | 3.40E-01 | 0.35%  | 0.14%  | 44.74% | 4.99%  | 0.17%  | 21.58% | 2.26%  | 0.32% | 0.67% | 0.00% | 24.78% |
| 72 | 4.571 | 1.50E-02 | 30.98% | 0.00%  | 8.60%  | 44.33% | 0.02%  | 7.26%  | 0.04%  | 0.01% | 0.18% | 0.01% | 8.57%  |
| 73 | 4.572 | 3.30E-02 | 36.68% | 0.00%  | 7.93%  | 38.74% | 0.02%  | 6.38%  | 0.02%  | 0.01% | 0.20% | 0.01% | 10.01% |
| 74 | 4.670 | 1.10E-02 | 5.19%  | 0.00%  | 5.90%  | 18.17% | 0.04%  | 64.74% | 0.16%  | 0.01% | 0.15% | 0.00% | 5.63%  |
| 75 | 4.680 | 0.00E+00 | 34.41% | 0.00%  | 5.64%  | 37.85% | 0.02%  | 11.04% | 0.03%  | 0.01% | 0.21% | 0.01% | 10.77% |
| 76 | 4.707 | 4.30E-02 | 7.93%  | 0.01%  | 6.02%  | 54.50% | 0.03%  | 27.86% | 0.08%  | 0.03% | 0.28% | 0.00% | 3.28%  |
| 77 | 4.764 | 5.20E-02 | 0.88%  | 0.08%  | 14.88% | 56.23% | 0.61%  | 20.44% | 2.34%  | 0.50% | 0.38% | 0.04% | 3.62%  |
| 78 | 4.771 | 1.00E-03 | 0.75%  | 0.05%  | 5.66%  | 16.31% | 0.20%  | 71.72% | 0.25%  | 0.03% | 0.20% | 0.01% | 4.82%  |
| 79 | 4.830 | 2.00E-03 | 0.09%  | 7.64%  | 10.70% | 2.85%  | 4.26%  | 6.41%  | 2.33%  | 1.83% | 1.42% | 0.07% | 62.42% |
| 80 | 4.831 | 0.00E+00 | 2.20%  | 0.22%  | 14.93% | 56.48% | 0.35%  | 19.49% | 1.34%  | 0.15% | 0.29% | 0.01% | 4.53%  |

Table S14: Energy (in Ev), oscillator strength and nature of the singlet states of 1-Hg

| State | Energy | Oscillator | M <sub>0</sub> C | M <sub>1</sub> C | LC     | M <sub>0</sub> LCT | M <sub>1</sub> LCT | LLCT   | XLCT   | XMCT   | M <sub>0</sub> M <sub>1</sub> CT | M <sub>1</sub> M <sub>0</sub> CT | Other  |
|-------|--------|------------|------------------|------------------|--------|--------------------|--------------------|--------|--------|--------|----------------------------------|----------------------------------|--------|
| 1     | 2.204  | 0.00E+00   | 3.64%            | 0.00%            | 5.43%  | 77.94%             | 0.04%              | 11.80% | 0.05%  | 0.00%  | 0.18%                            | 0.00%                            | 0.91%  |
| 2     | 2.346  | 1.00E-03   | 3.19%            | 0.00%            | 4.76%  | 71.76%             | 0.05%              | 18.86% | 0.06%  | 0.00%  | 0.16%                            | 0.00%                            | 1.17%  |
| 3     | 2.550  | 1.52E-01   | 1.89%            | 0.01%            | 12.10% | 71.93%             | 0.01%              | 12.77% | 0.02%  | 0.01%  | 0.25%                            | 0.00%                            | 1.01%  |
| 4     | 2.813  | 3.00E-03   | 1.99%            | 0.00%            | 12.23% | 79.80%             | 0.03%              | 5.49%  | 0.03%  | 0.00%  | 0.01%                            | 0.00%                            | 0.42%  |
| 5     | 2.851  | 1.00E-03   | 5.35%            | 0.00%            | 11.27% | 76.91%             | 0.03%              | 5.29%  | 0.03%  | 0.00%  | 0.01%                            | 0.00%                            | 1.11%  |
| 6     | 2.943  | 2.30E-02   | 2.26%            | 0.00%            | 5.96%  | 78.35%             | 0.05%              | 12.02% | 0.06%  | 0.00%  | 0.52%                            | 0.00%                            | 0.79%  |
| 7     | 2.965  | 1.20E-01   | 2.08%            | 0.00%            | 19.41% | 72.56%             | 0.03%              | 5.20%  | 0.04%  | 0.00%  | 0.01%                            | 0.00%                            | 0.67%  |
| 8     | 3.016  | 3.00E-03   | 1.81%            | 0.00%            | 13.60% | 73.30%             | 0.01%              | 10.65% | 0.02%  | 0.00%  | 0.03%                            | 0.00%                            | 0.58%  |
| 9     | 3.054  | 7.00E-02   | 2.65%            | 0.00%            | 9.56%  | 71.69%             | 0.03%              | 14.74% | 0.03%  | 0.00%  | 0.25%                            | 0.00%                            | 1.04%  |
| 10    | 3.096  | 9.40E-02   | 3.82%            | 0.00%            | 9.57%  | 70.65%             | 0.02%              | 14.32% | 0.03%  | 0.00%  | 0.23%                            | 0.00%                            | 1.36%  |
| 11    | 3.140  | 2.11E-01   | 3.03%            | 0.00%            | 15.60% | 71.12%             | 0.03%              | 8.78%  | 0.03%  | 0.00%  | 0.24%                            | 0.00%                            | 1.18%  |
| 12    | 3.174  | 7.00E-03   | 1.72%            | 0.00%            | 7.37%  | 77.91%             | 0.03%              | 12.22% | 0.04%  | 0.00%  | 0.13%                            | 0.00%                            | 0.57%  |
| 13    | 3.301  | 2.40E-02   | 0.96%            | 0.00%            | 5.89%  | 72.85%             | 0.06%              | 18.77% | 0.07%  | 0.00%  | 0.53%                            | 0.00%                            | 0.87%  |
| 14    | 3.355  | 1.00E-03   | 0.42%            | 0.02%            | 0.65%  | 7.65%              | 0.00%              | 1.37%  | 0.01%  | 0.03%  | 44.42%                           | 0.00%                            | 45.44% |
| 15    | 3.393  | 1.07E-01   | 0.97%            | 0.00%            | 12.26% | 73.20%             | 0.01%              | 13.11% | 0.01%  | 0.00%  | 0.05%                            | 0.00%                            | 0.40%  |
| 16    | 3.480  | 0.00E+00   | 0.34%            | 0.03%            | 1.14%  | 10.42%             | 0.01%              | 2.64%  | 0.01%  | 0.05%  | 38.42%                           | 0.00%                            | 46.95% |
| 17    | 3.493  | 0.00E+00   | 0.47%            | 0.00%            | 1.04%  | 6.16%              | 0.00%              | 1.19%  | 0.00%  | 0.01%  | 41.31%                           | 0.00%                            | 49.81% |
| 18    | 3.545  | 9.40E-02   | 1.55%            | 0.01%            | 12.73% | 64.76%             | 0.02%              | 13.59% | 0.02%  | 0.01%  | 2.83%                            | 0.00%                            | 4.48%  |
| 19    | 3.624  | 6.00E-03   | 0.10%            | 0.00%            | 2.48%  | 3.14%              | 0.00%              | 90.71% | 0.00%  | 0.00%  | 0.03%                            | 0.00%                            | 3.54%  |
| 20    | 3.673  | 4.00E-03   | 0.10%            | 0.00%            | 2.22%  | 1.58%              | 0.01%              | 92.55% | 0.02%  | 0.00%  | 0.00%                            | 0.00%                            | 3.54%  |
| 21    | 3.737  | 6.00E-03   | 2.00%            | 0.00%            | 14.41% | 76.31%             | 0.03%              | 6.54%  | 0.04%  | 0.00%  | 0.04%                            | 0.00%                            | 0.62%  |
| 22    | 3.881  | 4.00E-02   | 8.25%            | 0.00%            | 18.29% | 66.60%             | 0.03%              | 4.92%  | 0.04%  | 0.00%  | 0.07%                            | 0.00%                            | 1.80%  |
| 23    | 3.931  | 1.00E-03   | 13.23%           | 0.00%            | 12.62% | 64.71%             | 0.02%              | 6.49%  | 0.03%  | 0.00%  | 0.13%                            | 0.00%                            | 2.77%  |
| 24    | 3.936  | 4.00E-03   | 44.52%           | 0.00%            | 6.30%  | 36.37%             | 0.02%              | 3.36%  | 0.02%  | 0.02%  | 0.27%                            | 0.02%                            | 9.09%  |
| 25    | 3.946  | 0.00E+00   | 29.52%           | 0.00%            | 11.03% | 49.12%             | 0.02%              | 3.80%  | 0.02%  | 0.00%  | 0.22%                            | 0.00%                            | 6.26%  |
| 26    | 3.955  | 1.20E-02   | 7.65%            | 0.00%            | 16.31% | 65.82%             | 0.02%              | 8.21%  | 0.02%  | 0.00%  | 0.08%                            | 0.00%                            | 1.90%  |
| 27    | 4.043  | 4.00E-03   | 7.69%            | 0.00%            | 14.67% | 69.75%             | 0.02%              | 5.87%  | 0.03%  | 0.00%  | 0.04%                            | 0.00%                            | 1.94%  |
| 28    | 4.055  | 3.10E-02   | 18.37%           | 0.00%            | 10.23% | 60.54%             | 0.01%              | 5.86%  | 0.02%  | 0.00%  | 0.12%                            | 0.00%                            | 4.84%  |
| 29    | 4.070  | 5.40E-02   | 27.81%           | 0.00%            | 8.70%  | 51.66%             | 0.03%              | 4.42%  | 0.04%  | 0.00%  | 0.19%                            | 0.00%                            | 7.15%  |
| 30    | 4.077  | 1.00E-03   | 1.62%            | 0.00%            | 28.50% | 64.58%             | 0.03%              | 4.49%  | 0.04%  | 0.00%  | 0.01%                            | 0.00%                            | 0.73%  |
| 31    | 4.101  | 6.50E-02   | 4.79%            | 0.00%            | 28.41% | 55.76%             | 0.01%              | 9.06%  | 0.01%  | 0.00%  | 0.04%                            | 0.00%                            | 1.92%  |
| 32    | 4.164  | 1.20E-02   | 0.19%            | 0.06%            | 37.31% | 1.77%              | 13.29%             | 1.81%  | 42.23% | 1.45%  | 0.00%                            | 0.39%                            | 1.50%  |
| 33    | 4.172  | 1.19E-01   | 1.59%            | 0.00%            | 41.84% | 44.60%             | 0.21%              | 10.10% | 0.66%  | 0.03%  | 0.01%                            | 0.01%                            | 0.97%  |
| 34    | 4.174  | 1.35E-01   | 1.74%            | 0.00%            | 38.57% | 50.31%             | 0.09%              | 7.99%  | 0.25%  | 0.01%  | 0.01%                            | 0.00%                            | 1.02%  |
| 35    | 4.186  | 2.10E-02   | 4.24%            | 0.00%            | 13.36% | 69.52%             | 0.03%              | 11.46% | 0.09%  | 0.00%  | 0.01%                            | 0.00%                            | 1.28%  |
| 36    | 4.240  | 9.30E-02   | 1.02%            | 0.00%            | 49.90% | 34.91%             | 0.02%              | 12.78% | 0.03%  | 0.00%  | 0.01%                            | 0.00%                            | 1.33%  |
| 37    | 4.266  | 9.50E-02   | 0.19%            | 0.00%            | 81.38% | 8.23%              | 0.01%              | 7.73%  | 0.01%  | 0.00%  | 0.00%                            | 0.00%                            | 2.45%  |
| 38    | 4.295  | 2.00E-03   | 0.01%            | 0.00%            | 25.19% | 1.76%              | 0.00%              | 68.27% | 0.01%  | 0.00%  | 0.00%                            | 0.00%                            | 4.76%  |
| 39    | 4.305  | 9.79E-01   | 1.00%            | 0.00%            | 52.66% | 20.32%             | 0.01%              | 22.57% | 0.02%  | 0.00%  | 0.01%                            | 0.00%                            | 3.42%  |
| 40    | 4.315  | 3.00E-03   | 0.06%            | 0.02%            | 68.43% | 1.68%              | 5.93%              | 4.78%  | 15.64% | 0.54%  | 0.01%                            | 0.18%                            | 2.74%  |
| 41    | 4.347  | 4.08E-01   | 0.54%            | 0.00%            | 71.90% | 12.85%             | 0.03%              | 9.84%  | 0.07%  | 0.00%  | 0.00%                            | 0.00%                            | 4.76%  |
| 42    | 4.357  | 5.84E-01   | 0.17%            | 0.00%            | 26.26% | 6.28%              | 0.01%              | 62.49% | 0.01%  | 0.00%  | 0.00%                            | 0.00%                            | 4.79%  |
| 43    | 4.481  | 1.00E-03   | 0.02%            | 0.04%            | 0.10%  | 0.18%              | 7.01%              | 0.04%  | 89.10% | 3.01%  | 0.00%                            | 0.20%                            | 0.31%  |
| 44    | 4.501  | 2.00E-02   | 6.87%            | 0.00%            | 14.88% | 63.01%             | 0.09%              | 10.68% | 0.42%  | 0.20%  | 0.14%                            | 0.01%                            | 3.66%  |
| 45    | 4.514  | 0.00E+00   | 0.00%            | 0.03%            | 0.22%  | 0.00%              | 5.70%              | 0.02%  | 90.51% | 3.03%  | 0.00%                            | 0.16%                            | 0.34%  |
| 46    | 4.516  | 1.00E-03   | 0.15%            | 0.00%            | 0.24%  | 0.13%              | 0.01%              | 9.77%  | 0.07%  | 0.01%  | 0.24%                            | 0.00%                            | 89.39% |
| 47    | 4.537  | 3.00E-03   | 0.05%            | 0.00%            | 1.57%  | 0.40%              | 0.00%              | 94.75% | 0.00%  | 0.00%  | 0.01%                            | 0.00%                            | 3.22%  |
| 48    | 4.558  | 3.00E-03   | 47.91%           | 0.00%            | 4.73%  | 30.04%             | 0.03%              | 4.28%  | 0.09%  | 0.00%  | 0.41%                            | 0.00%                            | 12.51% |
| 49    | 4.566  | 0.00E+00   | 41.67%           | 0.00%            | 5.15%  | 27.73%             | 0.02%              | 6.95%  | 0.02%  | 0.02%  | 0.15%                            | 0.02%                            | 18.28% |
| 50    | 4.570  | 0.00E+00   | 4.76%            | 0.02%            | 0.79%  | 3.20%              | 0.00%              | 8.93%  | 0.02%  | 0.09%  | 0.57%                            | 0.00%                            | 81.61% |
| 51    | 4.588  | 3.00E-03   | 0.74%            | 0.00%            | 1.52%  | 2.55%              | 0.01%              | 90.98% | 0.03%  | 0.01%  | 0.02%                            | 0.00%                            | 4.14%  |
| 52    | 4.681  | 4.00E-03   | 43.49%           | 0.05%            | 6.82%  | 30.81%             | 0.02%              | 4.69%  | 0.11%  | 0.32%  | 0.25%                            | 0.01%                            | 13.44% |
| 53    | 4.704  | 8.01E-01   | 0.06%            | 0.29%            | 82.50% | 0.90%              | 0.16%              | 6.04%  | 0.43%  | 1.55%  | 0.04%                            | 0.00%                            | 8.03%  |
| 54    | 4.713  | 1.00E-03   | 0.06%            | 3.62%            | 0.17%  | 0.06%              | 0.53%              | 7.59%  | 52.87% | 0.00%  | 0.01%                            | 0.01%                            | 35.06% |
| 55    | 4.721  | 3.50E-02   | 0.01%            | 3.80%            | 0.56%  | 0.01%              | 0.69%              | 0.04%  | 8.02%  | 52.05% | 0.00%                            | 0.02%                            | 34.82% |

|    |       |          |       |       |        |        |        |        |        |        |       |       |        |
|----|-------|----------|-------|-------|--------|--------|--------|--------|--------|--------|-------|-------|--------|
| 56 | 4.736 | 1.19E-01 | 0.20% | 5.97% | 2.48%  | 0.83%  | 0.83%  | 0.30%  | 5.31%  | 38.50% | 0.19% | 0.01% | 45.38% |
| 57 | 4.817 | 1.40E-02 | 0.09% | 0.14% | 42.90% | 0.75%  | 12.67% | 2.59%  | 36.46% | 1.89%  | 0.00% | 0.38% | 2.11%  |
| 58 | 4.871 | 1.00E-03 | 1.56% | 0.01% | 18.33% | 57.24% | 1.98%  | 13.91% | 5.23%  | 0.10%  | 0.13% | 0.05% | 1.48%  |
| 59 | 4.909 | 1.00E-03 | 0.39% | 0.03% | 46.02% | 16.67% | 6.90%  | 7.63%  | 19.60% | 0.31%  | 0.04% | 0.14% | 2.29%  |
| 60 | 4.948 | 7.00E-03 | 0.59% | 0.02% | 11.76% | 21.21% | 2.33%  | 16.68% | 44.49% | 1.72%  | 0.04% | 0.06% | 1.11%  |
| 61 | 4.953 | 3.80E-02 | 0.50% | 0.95% | 12.99% | 33.59% | 0.16%  | 10.70% | 2.79%  | 18.31% | 0.14% | 0.00% | 19.88% |
| 62 | 4.965 | 1.80E-02 | 1.29% | 0.01% | 10.60% | 47.81% | 1.27%  | 13.31% | 23.62% | 0.91%  | 0.09% | 0.04% | 1.07%  |
| 63 | 4.971 | 1.88E-01 | 0.41% | 1.03% | 17.51% | 27.30% | 0.16%  | 5.92%  | 3.30%  | 21.95% | 0.13% | 0.00% | 22.28% |
| 64 | 5.004 | 1.00E-03 | 0.07% | 0.00% | 10.23% | 2.22%  | 0.14%  | 82.30% | 2.02%  | 0.08%  | 0.00% | 0.01% | 2.93%  |
| 65 | 5.040 | 3.60E-02 | 0.02% | 0.00% | 86.29% | 1.68%  | 0.02%  | 10.36% | 0.16%  | 0.01%  | 0.00% | 0.00% | 1.46%  |
| 66 | 5.046 | 4.40E-02 | 0.09% | 0.02% | 10.38% | 4.04%  | 0.59%  | 73.63% | 7.11%  | 0.64%  | 0.01% | 0.02% | 3.47%  |
| 67 | 5.077 | 0.00E+00 | 0.02% | 0.03% | 17.05% | 0.45%  | 5.98%  | 15.02% | 58.01% | 1.88%  | 0.00% | 0.19% | 1.38%  |
| 68 | 5.092 | 5.80E-02 | 0.02% | 0.00% | 86.55% | 2.56%  | 0.02%  | 9.43%  | 0.11%  | 0.00%  | 0.00% | 0.00% | 1.31%  |
| 69 | 5.092 | 2.00E-03 | 0.15% | 0.00% | 13.87% | 3.56%  | 0.52%  | 74.36% | 4.01%  | 0.14%  | 0.00% | 0.02% | 3.37%  |
| 70 | 5.136 | 3.00E-03 | 0.14% | 0.00% | 20.53% | 5.41%  | 0.65%  | 66.24% | 3.62%  | 0.12%  | 0.01% | 0.03% | 3.24%  |
| 71 | 5.141 | 0.00E+00 | 0.01% | 0.00% | 5.59%  | 0.60%  | 12.07% | 30.54% | 48.78% | 1.39%  | 0.00% | 0.26% | 0.76%  |
| 72 | 5.165 | 0.00E+00 | 0.00% | 0.05% | 0.06%  | 0.00%  | 6.89%  | 0.06%  | 89.73% | 2.85%  | 0.00% | 0.17% | 0.20%  |
| 73 | 5.193 | 0.00E+00 | 0.00% | 0.05% | 0.29%  | 0.02%  | 5.93%  | 0.15%  | 90.12% | 3.01%  | 0.00% | 0.15% | 0.28%  |
| 74 | 5.201 | 1.80E-02 | 0.07% | 0.01% | 62.14% | 5.83%  | 0.60%  | 26.91% | 2.88%  | 0.27%  | 0.00% | 0.02% | 1.28%  |
| 75 | 5.215 | 2.00E-03 | 0.26% | 0.00% | 58.32% | 8.22%  | 3.31%  | 14.10% | 13.30% | 0.70%  | 0.00% | 0.17% | 1.61%  |
| 76 | 5.230 | 1.00E-03 | 0.04% | 0.02% | 32.03% | 1.54%  | 9.27%  | 13.97% | 40.96% | 0.85%  | 0.00% | 0.16% | 1.16%  |
| 77 | 5.235 | 1.00E-03 | 0.08% | 0.01% | 26.58% | 3.05%  | 9.60%  | 15.46% | 40.84% | 2.17%  | 0.00% | 0.51% | 1.72%  |
| 78 | 5.242 | 6.80E-02 | 0.05% | 0.01% | 65.91% | 4.45%  | 0.12%  | 26.60% | 0.51%  | 0.15%  | 0.00% | 0.01% | 2.19%  |
| 79 | 5.253 | 6.70E-02 | 0.02% | 0.02% | 57.30% | 2.96%  | 0.04%  | 36.73% | 0.22%  | 0.27%  | 0.01% | 0.00% | 2.44%  |
| 80 | 5.271 | 0.00E+00 | 0.02% | 0.03% | 9.22%  | 0.44%  | 0.05%  | 3.37%  | 0.28%  | 0.02%  | 0.51% | 0.00% | 86.07% |

Table S15: Energy (in Ev), oscillator strength and nature of the singlet states of 1-Pb

| State | Energy | Oscillator | M <sub>0</sub> C | M <sub>1</sub> C | LC     | M <sub>0</sub> LCT | M <sub>1</sub> LCT | LLCT   | XLCT   | XMCT  | M <sub>0</sub> M <sub>1</sub> CT | M <sub>1</sub> M <sub>0</sub> CT | Other  |
|-------|--------|------------|------------------|------------------|--------|--------------------|--------------------|--------|--------|-------|----------------------------------|----------------------------------|--------|
| 1     | 2.151  | 2.00E-03   | 3.35%            | 0.00%            | 5.60%  | 77.29%             | 0.06%              | 11.74% | 0.04%  | 0.00% | 0.68%                            | 0.00%                            | 1.23%  |
| 2     | 2.308  | 3.00E-03   | 2.97%            | 0.00%            | 4.73%  | 70.57%             | 0.08%              | 19.44% | 0.02%  | 0.00% | 0.64%                            | 0.00%                            | 1.56%  |
| 3     | 2.490  | 1.36E-01   | 1.81%            | 0.01%            | 11.93% | 70.86%             | 0.02%              | 12.87% | 0.09%  | 0.01% | 0.90%                            | 0.00%                            | 1.50%  |
| 4     | 2.833  | 3.00E-03   | 2.17%            | 0.00%            | 12.71% | 78.38%             | 0.04%              | 6.04%  | 0.03%  | 0.00% | 0.05%                            | 0.00%                            | 0.57%  |
| 5     | 2.870  | 1.00E-03   | 4.95%            | 0.00%            | 11.80% | 75.90%             | 0.04%              | 6.06%  | 0.04%  | 0.00% | 0.03%                            | 0.00%                            | 1.17%  |
| 6     | 2.904  | 2.90E-02   | 2.26%            | 0.00%            | 5.89%  | 75.98%             | 0.07%              | 13.00% | 0.05%  | 0.01% | 1.19%                            | 0.00%                            | 1.56%  |
| 7     | 2.994  | 1.03E-01   | 2.38%            | 0.00%            | 19.60% | 70.85%             | 0.05%              | 6.15%  | 0.03%  | 0.00% | 0.06%                            | 0.00%                            | 0.89%  |
| 8     | 3.042  | 1.30E-02   | 1.74%            | 0.00%            | 10.39% | 71.09%             | 0.03%              | 14.98% | 0.05%  | 0.00% | 0.54%                            | 0.00%                            | 1.17%  |
| 9     | 3.044  | 2.30E-02   | 1.49%            | 0.00%            | 10.88% | 71.78%             | 0.04%              | 14.33% | 0.05%  | 0.00% | 0.43%                            | 0.00%                            | 1.01%  |
| 10    | 3.098  | 1.53E-01   | 4.53%            | 0.00%            | 12.48% | 70.03%             | 0.02%              | 11.12% | 0.06%  | 0.00% | 0.17%                            | 0.00%                            | 1.59%  |
| 11    | 3.125  | 1.70E-01   | 3.40%            | 0.00%            | 14.47% | 70.20%             | 0.03%              | 9.38%  | 0.08%  | 0.01% | 0.69%                            | 0.00%                            | 1.75%  |
| 12    | 3.165  | 4.90E-02   | 1.80%            | 0.00%            | 7.96%  | 76.83%             | 0.06%              | 12.48% | 0.05%  | 0.00% | 0.15%                            | 0.00%                            | 0.68%  |
| 13    | 3.313  | 3.40E-02   | 1.01%            | 0.00%            | 6.65%  | 71.54%             | 0.08%              | 20.07% | 0.03%  | 0.00% | 0.12%                            | 0.00%                            | 0.51%  |
| 14    | 3.383  | 9.10E-02   | 1.00%            | 0.00%            | 11.77% | 73.24%             | 0.01%              | 13.24% | 0.12%  | 0.00% | 0.13%                            | 0.00%                            | 0.49%  |
| 15    | 3.522  | 9.00E-03   | 0.10%            | 0.01%            | 3.40%  | 4.56%              | 0.96%              | 82.46% | 3.95%  | 0.17% | 0.02%                            | 0.03%                            | 4.34%  |
| 16    | 3.558  | 6.50E-02   | 1.58%            | 0.00%            | 12.27% | 58.88%             | 0.25%              | 23.91% | 1.05%  | 0.06% | 0.19%                            | 0.01%                            | 1.80%  |
| 17    | 3.596  | 1.30E-02   | 0.23%            | 0.01%            | 3.96%  | 8.27%              | 0.32%              | 81.81% | 1.04%  | 0.05% | 0.03%                            | 0.01%                            | 4.29%  |
| 18    | 3.739  | 4.00E-03   | 2.21%            | 0.06%            | 15.26% | 61.76%             | 3.81%              | 5.76%  | 9.49%  | 0.41% | 0.25%                            | 0.10%                            | 0.91%  |
| 19    | 3.748  | 6.00E-03   | 0.41%            | 0.25%            | 14.69% | 13.59%             | 16.96%             | 7.58%  | 42.65% | 1.87% | 0.07%                            | 0.48%                            | 1.45%  |
| 20    | 3.883  | 2.10E-02   | 23.78%           | 0.01%            | 11.86% | 51.68%             | 0.04%              | 4.32%  | 0.03%  | 0.01% | 2.32%                            | 0.02%                            | 5.96%  |
| 21    | 3.911  | 1.90E-02   | 29.37%           | 0.01%            | 10.38% | 44.78%             | 0.03%              | 3.71%  | 0.02%  | 0.02% | 3.75%                            | 0.01%                            | 7.92%  |
| 22    | 3.931  | 6.00E-03   | 24.56%           | 0.00%            | 9.74%  | 53.35%             | 0.02%              | 6.14%  | 0.04%  | 0.01% | 0.82%                            | 0.01%                            | 5.31%  |
| 23    | 3.949  | 0.00E+00   | 8.43%            | 0.00%            | 17.37% | 66.03%             | 0.05%              | 5.14%  | 0.07%  | 0.00% | 0.67%                            | 0.00%                            | 2.25%  |
| 24    | 3.969  | 8.00E-03   | 13.51%           | 0.00%            | 14.66% | 60.22%             | 0.03%              | 7.62%  | 0.10%  | 0.01% | 0.54%                            | 0.00%                            | 3.30%  |
| 25    | 4.017  | 2.00E-03   | 0.05%            | 0.02%            | 1.20%  | 0.13%              | 0.74%              | 1.15%  | 91.88% | 4.10% | 0.01%                            | 0.02%                            | 0.72%  |
| 26    | 4.050  | 6.00E-03   | 26.78%           | 0.00%            | 8.64%  | 48.12%             | 0.02%              | 5.18%  | 0.24%  | 0.02% | 2.62%                            | 0.01%                            | 8.37%  |
| 27    | 4.056  | 6.00E-03   | 21.71%           | 0.00%            | 10.39% | 53.93%             | 0.02%              | 5.33%  | 0.05%  | 0.01% | 2.06%                            | 0.00%                            | 6.50%  |
| 28    | 4.073  | 6.60E-02   | 2.96%            | 0.00%            | 13.39% | 75.42%             | 0.05%              | 6.34%  | 0.07%  | 0.00% | 0.73%                            | 0.00%                            | 1.04%  |
| 29    | 4.099  | 1.60E-02   | 1.10%            | 0.00%            | 31.10% | 60.29%             | 0.08%              | 6.06%  | 0.24%  | 0.01% | 0.24%                            | 0.00%                            | 0.89%  |
| 30    | 4.124  | 9.00E-02   | 1.28%            | 0.00%            | 32.83% | 51.49%             | 0.07%              | 8.68%  | 3.88%  | 0.19% | 0.28%                            | 0.00%                            | 1.29%  |
| 31    | 4.127  | 7.00E-03   | 0.09%            | 0.01%            | 5.60%  | 2.77%              | 0.73%              | 2.34%  | 83.69% | 3.81% | 0.02%                            | 0.02%                            | 0.93%  |
| 32    | 4.167  | 1.09E-01   | 1.29%            | 0.00%            | 37.88% | 36.96%             | 0.17%              | 20.81% | 1.59%  | 0.05% | 0.20%                            | 0.00%                            | 1.06%  |
| 33    | 4.177  | 1.74E-01   | 1.64%            | 0.00%            | 33.79% | 53.23%             | 0.04%              | 9.40%  | 0.06%  | 0.00% | 0.59%                            | 0.00%                            | 1.24%  |
| 34    | 4.191  | 5.00E-03   | 3.86%            | 0.00%            | 14.63% | 68.72%             | 0.01%              | 11.31% | 0.09%  | 0.01% | 0.16%                            | 0.00%                            | 1.21%  |
| 35    | 4.228  | 1.00E-03   | 0.79%            | 0.01%            | 10.57% | 26.79%             | 0.52%              | 53.51% | 2.31%  | 0.14% | 0.89%                            | 0.02%                            | 4.46%  |
| 36    | 4.252  | 6.30E-02   | 0.49%            | 0.00%            | 68.39% | 11.05%             | 0.25%              | 13.42% | 1.50%  | 0.09% | 0.50%                            | 0.01%                            | 4.29%  |
| 37    | 4.254  | 1.60E-02   | 0.74%            | 0.01%            | 35.91% | 12.99%             | 0.39%              | 42.12% | 2.40%  | 0.12% | 1.79%                            | 0.02%                            | 3.53%  |
| 38    | 4.274  | 2.00E-03   | 0.13%            | 0.04%            | 5.39%  | 0.68%              | 2.31%              | 1.10%  | 84.84% | 3.79% | 0.58%                            | 0.06%                            | 1.08%  |
| 39    | 4.281  | 2.40E-02   | 6.63%            | 0.02%            | 10.56% | 13.66%             | 0.06%              | 2.40%  | 1.82%  | 0.14% | 45.87%                           | 0.00%                            | 18.84% |
| 40    | 4.289  | 5.10E-02   | 0.33%            | 0.01%            | 45.87% | 4.09%              | 0.18%              | 37.57% | 0.74%  | 0.04% | 3.83%                            | 0.01%                            | 7.34%  |
| 41    | 4.332  | 1.03E+00   | 1.77%            | 0.02%            | 51.89% | 20.15%             | 0.29%              | 7.45%  | 1.40%  | 0.14% | 8.80%                            | 0.02%                            | 8.08%  |
| 42    | 4.340  | 7.48E-01   | 0.83%            | 0.00%            | 67.66% | 19.71%             | 0.03%              | 5.22%  | 0.15%  | 0.01% | 1.62%                            | 0.00%                            | 4.77%  |
| 43    | 4.356  | 4.00E-03   | 0.11%            | 0.05%            | 22.42% | 0.76%              | 2.05%              | 2.11%  | 66.97% | 3.15% | 0.39%                            | 0.07%                            | 1.92%  |
| 44    | 4.373  | 1.37E-01   | 7.18%            | 0.02%            | 12.33% | 19.25%             | 0.08%              | 3.17%  | 1.07%  | 0.11% | 36.14%                           | 0.00%                            | 20.64% |
| 45    | 4.435  | 1.10E-02   | 9.56%            | 0.03%            | 2.66%  | 15.18%             | 0.13%              | 2.75%  | 0.34%  | 0.04% | 45.07%                           | 0.01%                            | 24.23% |
| 46    | 4.442  | 2.00E-03   | 0.10%            | 0.42%            | 13.44% | 1.01%              | 19.13%             | 9.73%  | 50.17% | 2.89% | 0.44%                            | 0.63%                            | 2.05%  |
| 47    | 4.488  | 6.00E-03   | 0.52%            | 0.03%            | 3.91%  | 4.57%              | 1.86%              | 80.10% | 6.12%  | 0.21% | 0.57%                            | 0.05%                            | 2.07%  |
| 48    | 4.502  | 2.30E-02   | 7.37%            | 0.01%            | 11.39% | 49.92%             | 0.24%              | 15.31% | 1.02%  | 0.06% | 7.72%                            | 0.01%                            | 6.95%  |
| 49    | 4.560  | 3.00E-03   | 0.49%            | 0.00%            | 2.32%  | 1.09%              | 0.38%              | 92.13% | 1.31%  | 0.02% | 0.36%                            | 0.01%                            | 1.88%  |
| 50    | 4.571  | 0.00E+00   | 34.80%           | 0.01%            | 5.81%  | 28.78%             | 0.08%              | 4.80%  | 0.19%  | 0.03% | 10.68%                           | 0.02%                            | 14.81% |
| 51    | 4.588  | 4.00E-03   | 35.96%           | 0.00%            | 5.56%  | 26.47%             | 0.06%              | 4.19%  | 0.16%  | 0.03% | 12.47%                           | 0.02%                            | 15.08% |
| 52    | 4.630  | 6.07E-01   | 0.75%            | 0.06%            | 72.25% | 1.96%              | 2.28%              | 8.55%  | 8.14%  | 0.40% | 0.43%                            | 0.05%                            | 5.15%  |
| 53    | 4.689  | 1.90E-02   | 0.17%            | 0.05%            | 13.64% | 0.54%              | 20.24%             | 8.35%  | 54.05% | 1.51% | 0.04%                            | 0.53%                            | 0.89%  |
| 54    | 4.697  | 6.00E-03   | 7.33%            | 0.04%            | 4.17%  | 6.49%              | 1.88%              | 2.29%  | 67.08% | 3.82% | 2.47%                            | 0.05%                            | 4.39%  |
| 55    | 4.700  | 2.00E-02   | 23.65%           | 0.02%            | 8.53%  | 19.10%             | 1.17%              | 4.91%  | 21.04% | 1.16% | 8.17%                            | 0.05%                            | 12.21% |
| 56    | 4.707  | 1.60E-02   | 1.10%            | 0.06%            | 9.44%  | 1.65%              | 19.98%             | 9.05%  | 55.06% | 1.38% | 0.79%                            | 0.36%                            | 1.14%  |
| 57    | 4.721  | 1.37E-01   | 1.84%            | 0.08%            | 34.95% | 4.33%              | 5.84%              | 9.62%  | 35.14% | 1.76% | 2.07%                            | 0.18%                            | 4.19%  |
| 58    | 4.727  | 4.60E-02   | 3.94%            | 0.06%            | 6.28%  | 15.33%             | 0.57%              | 3.70%  | 2.25%  | 0.14% | 44.07%                           | 0.02%                            | 23.65% |
| 59    | 4.795  | 4.00E-03   | 0.02%            | 0.01%            | 1.57%  | 0.36%              | 21.13%             | 9.94%  | 61.74% | 3.16% | 0.24%                            | 1.07%                            | 0.75%  |
| 60    | 4.804  | 2.00E-02   | 0.02%            | 0.02%            | 4.83%  | 0.14%              | 0.94%              | 1.59%  | 86.13% | 5.02% | 0.00%                            | 0.04%                            | 1.26%  |
| 61    | 4.837  | 4.00E-03   | 3.14%            | 0.02%            | 2.55%  | 31.36%             | 0.07%              | 8.66%  | 0.12%  | 0.02% | 32.99%                           | 0.00%                            | 21.08% |
| 62    | 4.860  | 0.00E+00   | 5.63%            | 0.02%            | 4.13%  | 27.51%             | 0.08%              | 5.48%  | 0.38%  | 0.05% | 33.40%                           | 0.00%                            | 23.31% |
| 63    | 4.904  | 1.60E-02   | 2.96%            | 0.03%            | 7.46%  | 22.14%             | 0.62%              | 38.12% | 3.65%  | 0.17% | 13.68%                           | 0.02%                            | 11.16% |

|    |       |          |       |       |        |        |       |        |        |       |        |       |       |
|----|-------|----------|-------|-------|--------|--------|-------|--------|--------|-------|--------|-------|-------|
| 64 | 4.910 | 8.00E-03 | 0.73% | 0.01% | 3.91%  | 6.62%  | 1.18% | 17.54% | 63.02% | 2.51% | 2.11%  | 0.04% | 2.35% |
| 65 | 4.913 | 2.10E-02 | 1.40% | 0.02% | 6.10%  | 12.16% | 1.39% | 28.02% | 41.22% | 1.53% | 3.93%  | 0.04% | 4.21% |
| 66 | 4.930 | 1.10E-02 | 0.02% | 0.07% | 4.73%  | 0.45%  | 2.13% | 4.50%  | 81.82% | 4.68% | 0.11%  | 0.06% | 1.43% |
| 67 | 4.960 | 1.10E-02 | 0.26% | 0.07% | 19.63% | 7.90%  | 3.93% | 39.36% | 21.70% | 1.05% | 1.80%  | 0.11% | 4.21% |
| 68 | 4.971 | 5.20E-02 | 0.26% | 0.04% | 12.85% | 11.20% | 0.41% | 47.55% | 13.81% | 0.50% | 6.61%  | 0.01% | 6.75% |
| 69 | 4.987 | 6.00E-03 | 0.14% | 0.03% | 6.34%  | 5.17%  | 1.96% | 16.23% | 64.95% | 1.82% | 1.15%  | 0.04% | 2.17% |
| 70 | 4.997 | 2.30E-02 | 0.90% | 0.01% | 7.01%  | 36.47% | 0.15% | 36.49% | 0.72%  | 0.04% | 10.85% | 0.00% | 7.36% |
| 71 | 5.007 | 2.10E-02 | 0.73% | 0.02% | 13.67% | 37.32% | 0.91% | 11.92% | 16.86% | 0.64% | 10.82% | 0.03% | 7.09% |
| 72 | 5.020 | 2.00E-03 | 0.03% | 0.00% | 7.99%  | 0.86%  | 1.03% | 3.33%  | 82.28% | 3.91% | 0.12%  | 0.05% | 0.40% |
| 73 | 5.026 | 1.50E-02 | 0.05% | 0.01% | 34.57% | 1.97%  | 0.66% | 15.38% | 43.67% | 1.93% | 0.22%  | 0.02% | 1.53% |
| 74 | 5.035 | 1.00E-02 | 0.03% | 0.01% | 31.61% | 1.56%  | 0.64% | 8.56%  | 54.31% | 2.21% | 0.13%  | 0.02% | 0.93% |
| 75 | 5.038 | 1.40E-02 | 0.25% | 0.01% | 31.15% | 7.19%  | 0.52% | 52.78% | 3.26%  | 0.13% | 0.89%  | 0.02% | 3.83% |
| 76 | 5.080 | 7.10E-02 | 0.02% | 0.01% | 86.72% | 2.40%  | 0.26% | 7.04%  | 1.86%  | 0.07% | 0.05%  | 0.01% | 1.57% |
| 77 | 5.088 | 1.00E-03 | 0.05% | 0.06% | 14.99% | 1.61%  | 2.25% | 9.38%  | 66.25% | 3.05% | 0.26%  | 0.05% | 2.06% |
| 78 | 5.108 | 1.70E-02 | 0.08% | 0.03% | 17.33% | 2.90%  | 2.16% | 52.61% | 19.77% | 1.05% | 0.31%  | 0.08% | 3.68% |
| 79 | 5.130 | 8.00E-03 | 0.02% | 0.02% | 4.56%  | 0.25%  | 0.96% | 2.39%  | 86.97% | 3.38% | 0.67%  | 0.03% | 0.76% |
| 80 | 5.136 | 5.00E-03 | 0.02% | 0.03% | 4.01%  | 0.31%  | 0.93% | 4.29%  | 86.69% | 2.64% | 0.48%  | 0.02% | 0.60% |
